# Supplementary material for: From π‐Bonded Gallapnictenes to Nucleophilic, Redox‐Active Metal‐Coordinated Pnictanides
Source: PubMed Central journal article supplement — Angew Chem Int Ed Engl. 2020 Dec 15;60(7):3572–5. doi: 10.1002/anie.202013618 (PMC7898314; doi:10.1002/anie.202013618), 2020-12-15
Supplement: ANIE-60-3572-s001.pdf [file ANIE-60-3572-s001.pdf]

Supporting Information

**From  $\pi$ -Bonded Gallapnictenes to Nucleophilic, Redox-Active  
Metal-Coordinated Pnictanides**

*Julia Krüger, Christoph Wölper, and Stephan Schulz\**

anie\_202013618\_sm\_miscellaneous\_information.pdf

# Supporting Information

## Contents

### A) Experimental Details

#### B) Characterization

**Fig. S1 – S4.**  $^1\text{H}$ ,  $^{13}\text{C}\{^1\text{H}\}$ , and IR spectra of **1**.

**Fig. S5 – S8.**  $^1\text{H}$ ,  $^{13}\text{C}\{^1\text{H}\}$ , and IR spectra of **2**.

**Fig. S9 – S11.**  $^1\text{H}$ ,  $^{13}\text{C}\{^1\text{H}\}$ , and IR spectra of **5**.

**Fig. S12 – S14.**  $^1\text{H}$ ,  $^{13}\text{C}\{^1\text{H}\}$ , and IR spectra of **6**.

**Fig. S15 – S17.**  $^1\text{H}$ ,  $^{13}\text{C}\{^1\text{H}\}$ , and IR spectra of **7**.

**Fig. S18 – S20.**  $^1\text{H}$ ,  $^{13}\text{C}\{^1\text{H}\}$ , and IR spectra of **8**.

**Fig. S21 – S23.**  $^1\text{H}$ ,  $^{13}\text{C}\{^1\text{H}\}$ , and IR spectra of **9**.

**Fig. S24 – S26.**  $^1\text{H}$ ,  $^{13}\text{C}\{^1\text{H}\}$ , and IR spectra of **10**.

**Fig. S27.**  $^1\text{H}$  NMR spectrum of the reaction of  $[[\text{LGa}(\text{Cl})]_2\text{As}][\text{IPrH}]$  with TMSOTf in THF- $d_8$ .

**Fig. S28.**  $^1\text{H}$  NMR spectrum of the reaction of  $[[\text{LGa}(\text{Cl})]_2\text{Sb}][\text{IPrH}]$  with TMSOTf in THF- $d_8$ .

**Fig. S29.**  $^1\text{H}$  NMR spectrum of the reaction of  $[[\text{LGa}(\text{Cl})]_2\text{As}][\text{IPrH}]$  with  $[\text{FeCp}_2][\text{BARF}_4]$  in  $\text{C}_6\text{D}_6$ .

**Fig. S30.**  $^1\text{H}$  NMR spectrum of the reaction of  $[[\text{LGa}(\text{Cl})]_2\text{Sb}][\text{IPrH}]$  with  $[\text{FeCp}_2][\text{BARF}_4]$  in  $\text{C}_6\text{D}_6$ .

**Fig. S31.**  $^1\text{H}$  NMR spectrum of the reaction of  $\text{LGa}(\text{Cl})\text{AsGaL}$  with HCl in  $\text{C}_6\text{D}_6$ .

**Fig. S32.**  $^1\text{H}$  NMR spectrum of the reaction of  $\text{LGa}(\text{Cl})\text{SbGaL}$  with HCl in  $\text{C}_6\text{D}_6$ .

**Fig. S33.** *In-situ*  $^1\text{H}$  NMR spectrum of the reaction of  $\text{LGa}(\text{Cl})\text{AsGaL}$  with  $[\text{H}(\text{OEt}_2)_2][\text{BARF}_4]$  in THF- $d_8$ .

**Fig. S34.** *In-situ*  $^1\text{H}$  NMR spectrum of the reaction of  $\text{LGa}(\text{Cl})\text{SbGaL}$  with  $[\text{H}(\text{OEt}_2)_2][\text{Al}(\text{OC}(\text{CF}_3)_3)_4]$  in THF- $d_8$ .

**Fig. S35.**  $^1\text{H}$  NMR spectrum of the product from the stepwise reactions of  $\text{LGa}(\text{Cl})\text{AsGaL}$  with  $[\text{H}(\text{OEt}_2)_2][\text{BARF}_4]$  and  $\text{IPrHCl}$  in  $\text{C}_6\text{D}_6$ .

**Fig. S36.**  $^1\text{H}$  NMR spectrum of the product from the stepwise reactions of  $\text{LGa}(\text{Cl})\text{SbGaL}$  with  $[\text{H}(\text{OEt}_2)_2][\text{BARF}_4]$  and  $\text{IPrHCl}$  in  $\text{C}_6\text{D}_6$ .

#### C) Cyclic voltammetry

**Fig. S37.** Cyclic voltammograms of **1** and **2**.

#### D) Crystallographic Detail

**Table S1.** Single crystal X-ray diffraction data of **1**, **2**, **5** and **6**.

**Table S2.** Crystallographic details of **7-10**.

**Table S3.** Selected bond lengths and angles of  $[\text{LGa}(\text{Cl})]_2\text{E}[\text{IPrH}]$  (E = As **1**, Sb **2**),  $[\text{LGa}(\text{Cl})]_2\text{E}^*$  (E = As, Sb) and  $\text{LGaEGa}(\text{Cl})\text{L}$  (E = As, Sb).

**Table S4.** Central structural bond lengths [ $\text{\AA}$ ] and angles [ $^\circ$ ] of **1**, **2**, **5** and **6**.

**Table S5.** Central structural bond lengths [ $\text{\AA}$ ] and angles [ $^\circ$ ] of **7 - 10**.

**Fig. S38.** Solid state structure of **1**.

**Table S6, S7.** Bond lengths and angles of **1**.

**Fig. S39.** Solid state structure of **2**.

**Table S8, S9.** Bond lengths and angles of **2**.

**Fig. S40.** Solid state structure of **5**.

**Table S10, S11.** Bond lengths and angles of **5**.

**Fig. S41.** Solid state structure of **6**.

**Table S12, S13.** Bond lengths and angles of **6**.

**Fig. S42.** Solid state structure of **7**.

**Table S14, S15.** Bond lengths and angles of **7**.

**Fig. S43.** Solid state structure of **8**.

**Table S16, S17.** Bond lengths and angles of **8**.

**Fig. S44.** Solid state structure of **9**.

**Table S18, S19.** Bond lengths and angles of **9**.

**Fig. S45.** Solid state structure of **10**.

**Table S20, S21.** Bond lengths and angles of **10**.

#### **E) Quantum chemical calculations**

**Table S22.** Calculated bond lengths, Mayer bond order, natural charge ( $e$ ) and Wiberg bond index of anionic model system  $[ER_2]^-$  ( $E = As, Sb$ ;  $R = Me, NMe_2, OMe, SiMe_3, GaMe_2$ ).

**Fig. S46.** Calculated HOMO's and LUMO's with their corresponding orbital energy in eV of **1'** and **2'**.

**Table S23.** Mayer bond order of LGaEGa(Cl)L ( $E = As, Sb$ ), **1'**, **2'**, **5**, **6**, **9** and **10**.

**Table S24.** Wiberg bond index of LGaEGa(Cl)L ( $E = As, Sb$ ), **1'**, **2'**, **5**, **6**, **9** and **10**.

**Table S25.** Natural Charge of LGaEGa(Cl)L ( $E = As, Sb$ ), **1'**, **2'**, **5**, **6**, **9** and **10**.

**Table S26.** Bond polarization  $P(X; Y)$  of LGaEGa(Cl)L ( $E = As, Sb$ ) **1'**, **2'**, **5**, **6**, **9** and **10**.

**Table S27-S34.** Cartesian coordinates ( $x, y, z$ ) for the optimized geometry of **1'**, **2'**, **5**, **6**, **9**, **10**, **III** and **IV**.

**Table S35, S36.** Cartesian coordinates ( $x, y, z$ ) for the optimized geometry of  $[EMe_2]^-$  ( $E = As, Sb$ ).

**Table S37, S38.** Cartesian coordinates ( $x, y, z$ ) for the optimized geometry of  $[E(NMe_2)_2]^-$  ( $E = As, Sb$ ).

**Table S39, S40.** Cartesian coordinates ( $x, y, z$ ) for the optimized geometry of  $[E(OMe)_2]^-$  ( $E = As, Sb$ ).

**Table S41, S42.** Cartesian coordinates ( $x, y, z$ ) for the optimized geometry of  $[E(SiMe_3)_2]^-$  ( $E = As, Sb$ ).

**Table S43, S44.** Cartesian coordinates ( $x, y, z$ ) for the optimized geometry of  $[As(GaMe_2)_2]^-$  ( $E = As, Sb$ ).

## General Synthetic methods

All manipulations were performed in an atmosphere of purified argon using standard Schlenk and glovebox techniques. Toluene, Et<sub>2</sub>O and *n*-hexane were dried using an mBraun Solvent Purification System (SPS). Benzene and THF were carefully dried over K. Deuterated solvents were dried over activated molecular sieves (4 Å) and degassed prior to use. The anhydrous nature of the solvents was verified by Karl Fischer titration. LGa,<sup>[1]</sup> IPr,<sup>[2]</sup> [H(OEt<sub>2</sub>)<sub>2</sub>][BARF<sub>4</sub>],<sup>[3]</sup> [H(OEt<sub>2</sub>)<sub>2</sub>][Al(OC(CF<sub>3</sub>)<sub>3</sub>)<sub>4</sub>],<sup>[4]</sup> LGaEGa(Cl)L (E = As, Sb)<sup>[5]</sup> were prepared according to literature methods, whereas other chemicals were obtained from commercial sources and purified prior to use. Microanalyses were performed at the Elementaranalyselabor of the University of Duisburg-Essen. The melting points were measured using a Thermo Scientific 9300 apparatus. Cyclic voltammetry measurements were performed in a glovebox using a Metrohm Autolab PGSTAT 204 potentiostat with a three electrodes setup consisting of a Pt disc (*d* = 1 mm) working electrode, Pt wire counter electrode, and Ag wire pseudo-reference electrode using ferrocene as the internal standard.

## Spectroscopic methods NMR Spectroscopy

<sup>1</sup>H (300.1 MHz; 400 MHz) and <sup>13</sup>C{<sup>1</sup>H} (75.5 MHz; 150 MHz) NMR spectra were recorded using a Bruker Avance DPX-300 spectrometer or Ascend™ 400 spectrometer. The spectra were referenced to internal C<sub>6</sub>D<sub>6</sub>H (<sup>1</sup>H: δ = 7.16; <sup>13</sup>C: δ = 128.06), CDHCl<sub>2</sub> (<sup>1</sup>H: δ = 5.32; <sup>13</sup>C: δ = 53.84 and C<sub>4</sub>D<sub>7</sub>HO (<sup>1</sup>H: δ = 3.58, 1.72; <sup>13</sup>C: δ = 67.21, 25,31). IR spectra were recorded with an ALPHA-T FT-IR spectrometer equipped with a single reflection ATR sampling module. The IR spectrometer was placed in a glovebox to guarantee measurements under inert gas conditions.

## Synthesis [IPrH][Cl]

IPr (500 mg, 2.66 mmol) was dissolved in 4 mL toluene and HCl in Et<sub>2</sub>O (2.66 mmol; 1.33 mL 2 M) was added at ambient temperature. The reaction mixture was stirred for 1 h while a white precipitate was formed. The raw product was separated from the mother liquor and washed two times with 1 mL toluene. The white residue was dried in vacuum to yield analytically pure [IPrH][Cl] (yield 545 mg; 93 %). **<sup>1</sup>H-NMR (CD<sub>2</sub>Cl<sub>2</sub>, 300 MHz, 25 °C) δ [ppm]:** 10.84(s, 1 H, C<sup>+</sup>H), 4.49 (s, 2 H, <sup>3</sup>J<sub>HH</sub> = 6.8 Hz, CH(CH<sub>3</sub>)<sub>2</sub>), 2.23 (s, 6 H, CCH<sub>3</sub>), 1.68 (d, 12 H, <sup>3</sup>J<sub>HH</sub> = 6.8 Hz, CH(CH<sub>3</sub>)<sub>2</sub>).

## Synthesis [[LGa(Cl)]<sub>2</sub>E][IPrH]

*LGaEGa(Cl)L (E = As, Sb) is prepared in-situ from the reaction of 3 equivalents LGa with ECl<sub>3</sub> (E = As, Sb) as the purification of LGaEGa(Cl)L from LGaCl<sub>2</sub> results in a low yield of the starting compound LGaEGa(Cl)L. Since LGaCl<sub>2</sub> does not react with [IPrH][Cl] and [LGa(Cl)Sb]<sub>2</sub>, which is always formed in small amount as by-product, can be separated by filtration before starting the reaction with [IPrH][Cl] due to its low solubility in benzene, the in-situ synthesis generates significantly higher yields referred to ECl<sub>3</sub>.*

LGa (500 mg; 1.03 mmol) was dissolved in 2 mL benzene and AsCl<sub>3</sub> (62 mg; 28.7 μL; 0.34 mmol) in 0.5 mL benzene was added (*in-situ* synthesis of LGaAsGa(Cl)L). The solution was stirred for 3 days and then filtered in a Schlenk flask with [IPrH][Cl] (52 mg; 0.24 mmol). The suspension was stirred vigorously

for 2 h while a rose crystalline precipitate was formed. The raw product was separated from the mother liquor and washed three times with 0.3 mL benzene. The rose residue was dried in vacuum to yield analytically pure **1**.

**1**: Yield 234 mg (75 % referred to [IPrH][Cl]). M.p.: 198 °C (dec.). Anal. Calcd. for C<sub>69</sub>H<sub>103</sub>N<sub>6</sub>Cl<sub>2</sub>Ga<sub>2</sub>As: C, 63.66; H, 7.97; N, 6.46. Found: C, 64.8; H, 7.87; N, 5.95 % **<sup>1</sup>H-NMR (THF-*d*<sub>8</sub>, 300 MHz, 25 °C) δ [ppm]**: 9.21 (s, 1 H, HC<sup>+</sup>), 6.90-7.09 (m, 12 H, C<sub>6</sub>H<sub>3</sub>), 4.76 (s, 2 H, γ-CH), 4.67 (sept, 2 H, <sup>3</sup>J<sub>HH</sub> = 6.7 Hz, CH(CH<sub>3</sub>)<sub>2</sub>), 3.56 (sept (br), 4 H, CH(CH<sub>3</sub>)<sub>2</sub>), 3.28 (sept (br), 4 H, CH(CH<sub>3</sub>)<sub>2</sub>), 2.35 (s, 6 H, CCH<sub>3</sub>), 1.60 (d, 12 H, <sup>3</sup>J<sub>HH</sub> = 6.7 Hz, CH(CH<sub>3</sub>)<sub>2</sub>), 1.48 (s, 12 H, CCH<sub>3</sub>), 1.03-1.06 (m, 24 H, CH(CH<sub>3</sub>)<sub>2</sub>), 0.82-0.86 (m, 24 H, CH(CH<sub>3</sub>)<sub>2</sub>). **<sup>13</sup>C{<sup>1</sup>H}-NMR (THF-*d*<sub>8</sub>, 150 MHz, 25 °C) δ [ppm]**: 165.7 (NCCH<sub>3</sub>), 145.7 (C<sub>6</sub>H<sub>3</sub>), 145.4 (C<sub>6</sub>H<sub>3</sub>), 144.4 (C<sub>6</sub>H<sub>3</sub>), 131.5 (+CH), 127.9 (NCCH<sub>3</sub>), 125.9 (C<sub>6</sub>H<sub>3</sub>), 123.9 (C<sub>6</sub>H<sub>3</sub>), 123.6 (C<sub>6</sub>H<sub>3</sub>), 96.8 (γ-CH), 58.1 (CH(CH<sub>3</sub>)<sub>2</sub>), 29.9 (CH(CH<sub>3</sub>)<sub>2</sub>), 29.2 (CH(CH<sub>3</sub>)<sub>2</sub>), 28.1 (CH(CH<sub>3</sub>)<sub>2</sub>), 25.5 (CH(CH<sub>3</sub>)<sub>2</sub>), 25.0 (CH(CH<sub>3</sub>)<sub>2</sub>), 24.7 (CH(CH<sub>3</sub>)<sub>2</sub>), 23.1 (CH(CH<sub>3</sub>)<sub>2</sub>), 8.7 (NCCH<sub>3</sub>). **IR ν [cm<sup>-1</sup>]**: 3120, 3055, 2956, 2928, 2862, 1630, 1550, 1524, 1460, 1437, 1393, 1346, 1319, 1258, 1128, 1175, 1106, 1057, 1020, 937, 852, 793, 758, 638, 527, 498, 442, 395.

LGa (300 mg; 0.616 mmol) was dissolved in 2 mL benzene and SbCl<sub>3</sub> (47 mg; 0.201 mmol) in 0.5 mL benzene was added (*in-situ* synthesis of LGaSbGa(Cl)L). The solution was stirred overnight and then filtered in a Schlenk flask with [IPrH][Cl] (23 mg; 0.105 mmol). The suspension was stirred vigorously for 2 h while a purple crystalline precipitate of [[LGa(Cl)]<sub>2</sub>Sb][IPrH] was formed. The raw product was separated from the mother liquor and washed three times with 0.3 mL benzene. The purple residue was dried in vacuum to yield analytically pure **2**.

**2**: Yield 102 mg (72 % referred to [IPrH][Cl]). M. p.: 196 °C (dec.). Anal. Calcd. for C<sub>69</sub>H<sub>103</sub>N<sub>6</sub>Cl<sub>2</sub>Ga<sub>2</sub>Sb: C, 61.45; H, 7.70; N, 6.23. Found: C, 61.6; H, 7.62; N, 6.15 % **<sup>1</sup>H-NMR (THF-*d*<sub>8</sub>, 600 MHz, 25 °C) δ [ppm]**: 9.23 (s, 1 H, HC<sup>+</sup>), 6.78-7.00 (m, 12 H, C<sub>6</sub>H<sub>3</sub>), 4.82 (s, 2 H, γ-CH), 4.67 (sept, 2 H, <sup>3</sup>J<sub>HH</sub> = 6.7 Hz, CH(CH<sub>3</sub>)<sub>2</sub>), 3.61 (sept (br), 4 H, CH(CH<sub>3</sub>)<sub>2</sub>), 3.17 (sept (br), 4 H, CH(CH<sub>3</sub>)<sub>2</sub>), 2.36 (s, 6 H, CCH<sub>3</sub>), 1.61 (d, 12 H, <sup>3</sup>J<sub>HH</sub> = 6.7 Hz, CH(CH<sub>3</sub>)<sub>2</sub>), 1.54 (s, 12 H, CCH<sub>3</sub>), 1.10 (d, 12 H, <sup>3</sup>J<sub>HH</sub> = 6.5 Hz, CH(CH<sub>3</sub>)<sub>2</sub>), 1.05 (d, 12 H, <sup>3</sup>J<sub>HH</sub> = 6.5 Hz, CH(CH<sub>3</sub>)<sub>2</sub>), 0.85-0.87 (m (br), 24 H, CH(CH<sub>3</sub>)<sub>2</sub>). **<sup>13</sup>C{<sup>1</sup>H}-NMR (THF-*d*<sub>8</sub>, 150 MHz, 25 °C) δ [ppm]**: 165.6 (NCCH<sub>3</sub>), 146.1 (C<sub>6</sub>H<sub>3</sub>), 145.2 (C<sub>6</sub>H<sub>3</sub>), 144.2 (C<sub>6</sub>H<sub>3</sub>), 133.4 (+CH), 127.2 (NCCH<sub>3</sub>), 125.9 (C<sub>6</sub>H<sub>3</sub>), 124.0 (C<sub>6</sub>H<sub>3</sub>), 123.5 (C<sub>6</sub>H<sub>3</sub>), 97.2 (γ-CH), 51.7 (CH(CH<sub>3</sub>)<sub>2</sub>), 30.1 (CH(CH<sub>3</sub>)<sub>2</sub>), 29.4 (CH(CH<sub>3</sub>)<sub>2</sub>), 28.2 (CH(CH<sub>3</sub>)<sub>2</sub>), 25.5 (CH(CH<sub>3</sub>)<sub>2</sub>), 25.1 (CH(CH<sub>3</sub>)<sub>2</sub>), 24.8 (CH(CH<sub>3</sub>)<sub>2</sub>), 23.2 (CH(CH<sub>3</sub>)<sub>2</sub>), 8.6 (NCCH<sub>3</sub>). **IR ν [cm<sup>-1</sup>]**: 3124, 3058, 2961, 2923, 2862, 1630, 1550, 1523, 1461, 1437, 1392, 1346, 1319, 1283, 1260, 1228, 1175, 1139, 1100, 1059, 1018, 937, 852, 792, 758, 638, 592, 527, 442.

### Synthesis [LGa(Cl)]<sub>2</sub>EH (E = As **5**, Sb **6**)

**a**) [LGa(Cl)]<sub>2</sub>E[IPrH] (0.023 mmol) and [H(OEt)<sub>2</sub>][BAR<sup>F</sup><sub>4</sub>] (19 mg; 0.023 mmol) were weighed in a Schlenk flask, cooled to -78 °C and 2 mL THF were added. The reaction mixture was slowly warmed to ambient temperature over a period of 2 h and stirred for an additional hour at room temperature. The solvent was removed in vacuum and 6 mL n-hexane were added to the residue. The filtrate was

separated from the white precipitate of [IPrH][BARF<sub>4</sub>], which was formed immediately, concentrated and stored for 5 days at ambient temperature to yield colorless crystals of **5** and **6**.

**b)** LGaEGa(Cl)L (0.026 mmol) and [H(OEt<sub>2</sub>)<sub>2</sub>][BARF<sub>4</sub>] (22 mg; 0.026 mmol) were weighed in a Schlenk flask, cooled to -78°C and 1 mL Et<sub>2</sub>O were added (*in situ* synthesis of the supposed cationic species [LGaE(H)Ga(Cl)L]). The reaction mixture was stirred for 10 minutes at -78°C. IPrHCl (6 mg; 0.026 mmol), suspended in 2 mL Et<sub>2</sub>O, was added to the colorless reaction solution and stirred for 10 minutes at -78°C. The reaction mixture was warmed up to ambient temperature and stirred for additional 30 minutes. The purification is carried out according to the procedure described before.

**c)** LGaEGa(Cl)L (0.017 mmol) was weighed in a Schlenk flask, cooled to -78°C and 2 mL THF were added. HCl (0.018 mmol) in Et<sub>2</sub>O was added and the reaction mixture was stirred for 10 minutes at -78°C. The colorless solution was warmed up to ambient temperature and stirred for an additional hour at room temperature. The solvent was removed in vacuum and the residue was dissolved in 3 mL n-hexane and stored for 3 days at ambient temperature to yield colorless crystals of **5** and **6**.

**5:** Yield 19 mg (65 %). M.p.: 186 °C (dec.). Anal. Calcd. for C<sub>58</sub>H<sub>83</sub>N<sub>4</sub>Cl<sub>2</sub>Ga<sub>2</sub>As: C, 62.11; H, 7.46; N, 5.00. Found: C, 62.3; H, 7.60; N, 5.21 % **<sup>1</sup>H-NMR (C<sub>6</sub>D<sub>6</sub>, 300 MHz, 25 °C) δ [ppm]:** 6.96-7.13 (m, 12 H, C<sub>6</sub>H<sub>3</sub>), 4.81 (s, 2 H, γ-CH), 3.58 (sept, 4 H, <sup>3</sup>J<sub>HH</sub> = 6.8 Hz, CH(CH<sub>3</sub>)<sub>2</sub>), 3.10 (sept (br), 4 H, CH(CH<sub>3</sub>)<sub>2</sub>), 1.48 (s, 12 H, CCH<sub>3</sub>) 1.19 (d, 36 H, <sup>3</sup>J<sub>HH</sub> = 6.8 Hz, CH(CH<sub>3</sub>)<sub>2</sub>), 0.98 (d, 12 H, <sup>3</sup>J<sub>HH</sub> = 6.8 Hz, CH(CH<sub>3</sub>)<sub>2</sub>), -1.32 (s, 1 H, AsH). **<sup>13</sup>C{<sup>1</sup>H}-NMR (C<sub>6</sub>D<sub>6</sub>, 150 MHz, 25 °C) δ [ppm]:** 169.1 (NCCH<sub>3</sub>), 146.7 (C<sub>6</sub>H<sub>3</sub>), 142.8 (C<sub>6</sub>H<sub>3</sub>), 141.3 (C<sub>6</sub>H<sub>3</sub>), 127.7 (C<sub>6</sub>H<sub>3</sub>), 125.7 (C<sub>6</sub>H<sub>3</sub>), 123.9 (C<sub>6</sub>H<sub>3</sub>), 98.0 (γ-CH), 29.9 (CH(CH<sub>3</sub>)<sub>2</sub>), 28.5 (CH(CH<sub>3</sub>)<sub>2</sub>), 28.2 (CH(CH<sub>3</sub>)<sub>2</sub>), 25.4 (CH(CH<sub>3</sub>)<sub>2</sub>), 24.6 (CH(CH<sub>3</sub>)<sub>2</sub>), 24.2 (CH(CH<sub>3</sub>)<sub>2</sub>). **IR ν [cm<sup>-1</sup>]:** 3061, 2961, 2925, 2867, 2078, 1626, 1547, 1526, 1460, 1438, 1383, 1345, 1317, 1257, 1178, 1100, 1059, 1020, 937, 865, 797, 757, 722, 638, 616, 535, 461, 394,

**6:** Yield 16 mg (53 %). M.p.: 181 °C (dec.). Anal. Calcd. for C<sub>58</sub>H<sub>83</sub>N<sub>4</sub>Cl<sub>2</sub>Ga<sub>2</sub>Sb: C, 59.62; H, 7.16; N, 4.80. Found: C, 60.7; H, 7.08; N, 4.56 % **<sup>1</sup>H-NMR (C<sub>6</sub>D<sub>6</sub>, 400 MHz, 25 °C) δ [ppm]:** 6.99-7.20 (m, 12 H, C<sub>6</sub>H<sub>3</sub>), 4.84 (s, 2 H, γ-CH), 3.63 (sept, 4 H, <sup>3</sup>J<sub>HH</sub> = 6.7 Hz, CH(CH<sub>3</sub>)<sub>2</sub>), 3.16 (sept, 2 H, <sup>3</sup>J<sub>HH</sub> = 6.7 Hz, CH(CH<sub>3</sub>)<sub>2</sub>), 2.99 (sept, 2 H, CH(CH<sub>3</sub>)<sub>2</sub>), 1.55 (s, 6 H, CCH<sub>3</sub>), 1.51 (s, 6 H, CCH<sub>3</sub>), 1.28 (d, 6 H, <sup>3</sup>J<sub>HH</sub> = 6.8 Hz, CH(CH<sub>3</sub>)<sub>2</sub>), 1.26 (d, 6 H, <sup>3</sup>J<sub>HH</sub> = 6.7 Hz, CH(CH<sub>3</sub>)<sub>2</sub>), 1.23-1.18 (m, 18 H, CH(CH<sub>3</sub>)<sub>2</sub>), 1.16 (d, 6 H, <sup>3</sup>J<sub>HH</sub> = 6.7 Hz, CH(CH<sub>3</sub>)<sub>2</sub>), 0.98 (d, 6 H, <sup>3</sup>J<sub>HH</sub> = 6.8 Hz, CH(CH<sub>3</sub>)<sub>2</sub>), 0.96 (d, 6 H, <sup>3</sup>J<sub>HH</sub> = 6.8 Hz, CH(CH<sub>3</sub>)<sub>2</sub>), -3.59 (s, 1 H, SbH). **<sup>13</sup>C{<sup>1</sup>H}-NMR (C<sub>6</sub>D<sub>6</sub>, 150 MHz, 25 °C) δ [ppm]:** 168.7 (NCCH<sub>3</sub>), 168.6 (NCCH<sub>3</sub>), 146.4 (C<sub>6</sub>H<sub>3</sub>), 146.4 (C<sub>6</sub>H<sub>3</sub>), 142.5 (C<sub>6</sub>H<sub>3</sub>), 142.5 (C<sub>6</sub>H<sub>3</sub>), 141.2 (C<sub>6</sub>H<sub>3</sub>), 141.1 (C<sub>6</sub>H<sub>3</sub>), 127.5 (C<sub>6</sub>H<sub>3</sub>), 127.4 (C<sub>6</sub>H<sub>3</sub>), 125.5 (C<sub>6</sub>H<sub>3</sub>), 125.4 (C<sub>6</sub>H<sub>3</sub>), 123.7 (C<sub>6</sub>H<sub>3</sub>), ) 123.5 (C<sub>6</sub>H<sub>3</sub>), 97.9 (γ-CH), 30.0 (CH(CH<sub>3</sub>)<sub>2</sub>), 29.8 (CH(CH<sub>3</sub>)<sub>2</sub>), 28.3 (CH(CH<sub>3</sub>)<sub>2</sub>), 28.2 (CH(CH<sub>3</sub>)<sub>2</sub>), 28.0 (CH(CH<sub>3</sub>)<sub>2</sub>), 28.0 (CH(CH<sub>3</sub>)<sub>2</sub>), 25.0 (CH(CH<sub>3</sub>)<sub>2</sub>), 25.0 (CH(CH<sub>3</sub>)<sub>2</sub>), 24.5 (CH(CH<sub>3</sub>)<sub>2</sub>), 24.3 (CH(CH<sub>3</sub>)<sub>2</sub>), 24.3 (CH(CH<sub>3</sub>)<sub>2</sub>), 24.0 (CH(CH<sub>3</sub>)<sub>2</sub>), 23.9 (CH(CH<sub>3</sub>)<sub>2</sub>), 23.7 (CH(CH<sub>3</sub>)<sub>2</sub>). **IR ν [cm<sup>-1</sup>]:** 3061, 2959, 2925, 2867, 1858, 1621, 1547, 1521, 1460, 1437, 1382, 1316, 1257, 1175, 1099, 1057, 1018, 935, 863, 796, 757, 710, 634, 528, 436.

### Synthesis LGa(Cl)E(Me)Ga(I)L (As 7, Sb 8)

LGaEGa(Cl)L (0.029 mmol) was dissolved in 2 mL toluene, cooled to  $-78^{\circ}\text{C}$  and methyl iodide (4.2 mg; 1.84  $\mu\text{L}$ ; 0.029 mmol) in 0.5 mL toluene was added. The reaction mixture was warmed up to ambient temperature and the solvent was removed. The residue was dissolved in 3 mL n-hexane, concentrated until crystallization started and stored for 2 days at ambient temperature to yield colorless crystals of **7** and **8**.

**7**: Yield 18 mg (51 %). M.p.:  $209^{\circ}\text{C}$  (dec.). Anal. Calcd. for  $\text{C}_{59}\text{H}_{85}\text{N}_4\text{ClGa}_2\text{IAs}$ : C, 57.75; H, 6.98; N, 4.57. Found: C, 57.6; H, 6.82; N, 4.51 %.  **$^1\text{H-NMR}$  ( $\text{C}_6\text{D}_6$ , 300 MHz,  $25^{\circ}\text{C}$ )  $\delta$  [ppm]**: .6.89-7.14 (m, 12 H,  $\text{C}_6\text{H}_3$ ), 5.04 (s, 1 H,  $\gamma\text{-CH}$ ), 4.87 (s, 1 H,  $\gamma\text{-CH}$ ), 3.83 (sept, 2 H,  $^3J_{\text{HH}} = 6.7$  Hz,  $\text{CH}(\text{CH}_3)_2$ ), 3.86 (sept, 2 H,  $^3J_{\text{HH}} = 6.7$  Hz,  $\text{CH}(\text{CH}_3)_2$ ), 3.14-3.24 (m, 4 H,  $\text{CH}(\text{CH}_3)_2$ ), 1.50 (s, 6 H,  $\text{CCH}_3$ ), 1.49 (s, 6 H,  $\text{CCH}_3$ ), 1.37-1.41 (m, 9 H,  $\text{CH}(\text{CH}_3)_2$ ), 1.16-1.23 (m, 27 H,  $\text{CH}(\text{CH}_3)_2$ ), 0.95-0.99 (m, 12 H,  $\text{CH}(\text{CH}_3)_2$ ), 0.04 (s, 3 H,  $\text{CH}_3$ ).  **$^{13}\text{C}\{^1\text{H}\}\text{-NMR}$  ( $\text{C}_6\text{D}_6$ , 150 MHz,  $25^{\circ}\text{C}$ )  $\delta$  [ppm]**: 169.4 ( $\text{NCCH}_3$ ), 169.0 ( $\text{NCCH}_3$ ), 146.3 ( $\text{C}_6\text{H}_3$ ), 145.9 ( $\text{C}_6\text{H}_3$ ), 143.2 ( $\text{C}_6\text{H}_3$ ), 142.7 ( $\text{C}_6\text{H}_3$ ), 127.4 ( $\text{C}_6\text{H}_3$ ), 127.4 ( $\text{C}_6\text{H}_3$ ), 125.6 ( $\text{C}_6\text{H}_3$ ), 125.5 ( $\text{C}_6\text{H}_3$ ), 123.8 ( $\text{C}_6\text{H}_3$ ), 123.5 ( $\text{C}_6\text{H}_3$ ), 99.2 ( $\gamma\text{-CH}$ ), 98.2 ( $\gamma\text{-CH}$ ), 29.6 ( $\text{CH}(\text{CH}_3)_2$ ), 29.5 ( $\text{CH}(\text{CH}_3)_2$ ), 28.8 ( $\text{CH}(\text{CH}_3)_2$ ), 28.2 ( $\text{CH}(\text{CH}_3)_2$ ), 28.2 ( $\text{CH}(\text{CH}_3)_2$ ), 25.2 ( $\text{CH}(\text{CH}_3)_2$ ), 25.1 ( $\text{CH}(\text{CH}_3)_2$ ), 24.7 ( $\text{CH}(\text{CH}_3)_2$ ), 24.6 ( $\text{C}(\text{CH}_3)_2$ ), 24.4 ( $\text{C}(\text{CH}_3)_2$ ), 24.1 ( $\text{CH}(\text{CH}_3)_2$ ), 24.0 ( $\text{CH}(\text{CH}_3)_2$ ), 23.8 ( $\text{CH}(\text{CH}_3)_2$ ), 23.8 ( $\text{CH}(\text{CH}_3)_2$ ),  $-8.5$  ( $\text{AsCH}_3$ ). **IR  $\nu$  [ $\text{cm}^{-1}$ ]**: 3041, 2961, 2926, 2867, 1523, 1458, 1437, 1386, 1316, 1206, 1177, 1095, 1056, 1018, 937, 862, 796, 757, 723, 707, 661, 636, 490, 442, 398.

**8**: Yield 15 mg (42 %). M.p.:  $207^{\circ}\text{C}$  (dec.). Anal. Calcd. for  $\text{C}_{59}\text{H}_{85}\text{N}_4\text{ClGa}_2\text{ISb}$ : C, 55.63; H, 6.73; N, 4.40. Found: C, 55.7 H, 6.73; N, 4.38%.  **$^1\text{H-NMR}$  ( $\text{C}_6\text{D}_6$ , 400 MHz,  $25^{\circ}\text{C}$ )  $\delta$  [ppm]**: 6.93-7.14 (m, 12 H,  $\text{C}_6\text{H}_3$ ), 5.06 (s, 1 H,  $\gamma\text{-CH}$ ), 4.90 (s, 1 H,  $\gamma\text{-CH}$ ), 4.05 (sept, 1 H,  $^3J_{\text{HH}} = 6.7$  Hz,  $\text{CH}(\text{CH}_3)_2$ ), 3.86 (sept, 1 H,  $^3J_{\text{HH}} = 6.7$  Hz,  $\text{CH}(\text{CH}_3)_2$ ), 3.71 (sept, 1 H,  $^3J_{\text{HH}} = 6.7$  Hz,  $\text{CH}(\text{CH}_3)_2$ ), 3.54 (sept, 1 H,  $^3J_{\text{HH}} = 6.7$  Hz,  $\text{CH}(\text{CH}_3)_2$ ), 3.14-3.31 (m, 4 H,  $\text{CH}(\text{CH}_3)_2$ ), 1.56 (d, 3 H,  $^3J_{\text{HH}} = 6.7$  Hz,  $\text{CH}(\text{CH}_3)_2$ ), 1.51 (d, 3 H,  $^3J_{\text{HH}} = 6.7$  Hz,  $\text{CH}(\text{CH}_3)_2$ ), 1.49 (s, 12 H,  $\text{CCH}_3$ ), 1.18-1.32 (m, 30 H,  $\text{CH}(\text{CH}_3)_2$ ), 0.94-0.98 (m, 12 H,  $\text{CH}(\text{CH}_3)_2$ ),  $-0.35$  (s, 3 H,  $\text{CH}_3$ ).  **$^{13}\text{C}\{^1\text{H}\}\text{-NMR}$  ( $\text{C}_6\text{D}_6$ , 150 MHz,  $25^{\circ}\text{C}$ )  $\delta$  [ppm]**: 169.2 ( $\text{NCCH}_3$ ), 168.9 ( $\text{NCCH}_3$ ), 168.6 ( $\text{NCCH}_3$ ), 146.7 ( $\text{C}_6\text{H}_3$ ), 146.3 ( $\text{C}_6\text{H}_3$ ), 146.3 ( $\text{C}_6\text{H}_3$ ), 146.1 ( $\text{C}_6\text{H}_3$ ), 143.5 ( $\text{C}_6\text{H}_3$ ), 143.3 ( $\text{C}_6\text{H}_3$ ), 143.2 ( $\text{C}_6\text{H}_3$ ), 143.1 ( $\text{C}_6\text{H}_3$ ), 142.5 ( $\text{C}_6\text{H}_3$ ), 141.8 ( $\text{C}_6\text{H}_3$ ), 141.6 ( $\text{C}_6\text{H}_3$ ), 141.4 ( $\text{C}_6\text{H}_3$ ), 127.6 ( $\text{C}_6\text{H}_3$ ), 127.5 ( $\text{C}_6\text{H}_3$ ), 127.5 ( $\text{C}_6\text{H}_3$ ), 125.8 ( $\text{C}_6\text{H}_3$ ), 125.6 ( $\text{C}_6\text{H}_3$ ), 125.5 ( $\text{C}_6\text{H}_3$ ), 123.8 ( $\text{C}_6\text{H}_3$ ), 123.6 ( $\text{C}_6\text{H}_3$ ), 99.3 ( $\gamma\text{-CH}$ ), 98.5 ( $\gamma\text{-CH}$ ), 31.1 ( $\text{CH}(\text{CH}_3)_2$ ), 30.2 ( $\text{CH}(\text{CH}_3)_2$ ), 30.2 ( $\text{CH}(\text{CH}_3)_2$ ), 29.3 ( $\text{CH}(\text{CH}_3)_2$ ), 29.2 ( $\text{CH}(\text{CH}_3)_2$ ), 29.2 ( $\text{CH}(\text{CH}_3)_2$ ), 28.9 ( $\text{CH}(\text{CH}_3)_2$ ), 28.4 ( $\text{CH}(\text{CH}_3)_2$ ), 28.3 ( $\text{CH}(\text{CH}_3)_2$ ), 28.1 ( $\text{CH}(\text{CH}_3)_2$ ), 28.0 ( $\text{CH}(\text{CH}_3)_2$ ), 25.3 ( $\text{CH}(\text{CH}_3)_2$ ), 25.1 ( $\text{CH}(\text{CH}_3)_2$ ), 25.0 ( $\text{CH}(\text{CH}_3)_2$ ), 24.9 ( $\text{CH}(\text{CH}_3)_2$ ), 24.6 ( $\text{CH}(\text{CH}_3)_2$ ), 24.5 ( $\text{CH}(\text{CH}_3)_2$ ), 24.4 ( $\text{CH}(\text{CH}_3)_2$ ), 24.4 ( $\text{CH}(\text{CH}_3)_2$ ), 24.3 ( $\text{CH}(\text{CH}_3)_2$ ), 24.3 ( $\text{C}(\text{CH}_3)_2$ ), 24.1 ( $\text{C}(\text{CH}_3)_2$ ), 24.1 ( $\text{C}(\text{CH}_3)_2$ ), 23.9 ( $\text{CH}(\text{CH}_3)_2$ ), 23.6 ( $\text{CH}(\text{CH}_3)_2$ ), 23.6 ( $\text{CH}(\text{CH}_3)_2$ ),  $-28.2$  ( $\text{SbCH}_3$ ). **IR  $\nu$  [ $\text{cm}^{-1}$ ]**: 3060, 2961, 2925, 2866, 1551, 1521, 1460, 1435, 1383, 1314, 1287, 1258, 1195, 1175, 1098, 1057, 1017, 937, 859, 794, 758, 707, 638, 619, 529, 500, 437, 419.

### Synthesis $[\text{LGa}(\text{Cl})]_2\text{EMe}$ (As 9, Sb 10)

$[[\text{LGa}(\text{Cl})]_2\text{E}[\text{IPrH}]]$  (0.029 mmol) was dissolved in 2 mL THF, cooled to  $-78^{\circ}\text{C}$  and methyl iodide (4.2 mg; 1.84  $\mu\text{L}$ ; 0.029 mmol) in 0.5 mL THF was added. The reaction mixture was warmed up to

ambient temperature and the solvent was removed. 2 mL toluene were added to the residue and white precipitate of [IPrH][I] was formed. The mother liquor was separated and the solvent was removed. The residue was dissolved in 5 mL n-hexane, concentrated until crystallization started and stored for 6 days at 0 °C to yield colorless crystals of **7** and **8**.

**9**: Yield 21 mg (64 %). M.p.: 195 °C (dec.). Anal. Calcd. for C<sub>59</sub>H<sub>85</sub>N<sub>4</sub>Cl<sub>2</sub>Ga<sub>2</sub>As: C, 62.40; H, 7.54; N, 4.93. Found: C, 62.5; H, 7.56; N, 4.99 %. **<sup>1</sup>H-NMR (C<sub>6</sub>D<sub>6</sub>, 400 MHz, 25 °C) δ [ppm]**: 6.96-7.14 (m, 12 H, C<sub>6</sub>H<sub>3</sub>), 4.88 (s, 2 H, γ-CH), 3.71 (sept (br), 4 H, CH(CH<sub>3</sub>)<sub>2</sub>), 3.18 (sept, 4 H, <sup>3</sup>J<sub>HH</sub> = 6.8 Hz, CH(CH<sub>3</sub>)<sub>2</sub>), 1.48 (s, 12 H, CCH<sub>3</sub>), 1.33 (d, 12 H, <sup>3</sup>J<sub>HH</sub> = 6.6 Hz, CH(CH<sub>3</sub>)<sub>2</sub>), 1.22 (d, 12 H, <sup>3</sup>J<sub>HH</sub> = 6.8 Hz, CH(CH<sub>3</sub>)<sub>2</sub>), 1.20 (d, 12 H, <sup>3</sup>J<sub>HH</sub> = 6.8 Hz, CH(CH<sub>3</sub>)<sub>2</sub>), 0.98 (d, 12 H, <sup>3</sup>J<sub>HH</sub> = 6.8 Hz, CH(CH<sub>3</sub>)<sub>2</sub>), 0.04 (s, 3 H, CH<sub>3</sub>). **<sup>13</sup>C{<sup>1</sup>H}-NMR (C<sub>6</sub>D<sub>6</sub>, 150 MHz, 25 °C) δ [ppm]**: 169.0 (NCCH<sub>3</sub>), 146.1 (C<sub>6</sub>H<sub>3</sub>), 142.9 (C<sub>6</sub>H<sub>3</sub>), 142.6 (C<sub>6</sub>H<sub>3</sub>), 127.4 (C<sub>6</sub>H<sub>3</sub>), 125.3 (C<sub>6</sub>H<sub>3</sub>), 123.6 (C<sub>6</sub>H<sub>3</sub>), 98.5 (γ-CH), 29.5 (CH(CH<sub>3</sub>)<sub>2</sub>), 28.3 (CH(CH<sub>3</sub>)<sub>2</sub>), 27.8 (CH(CH<sub>3</sub>)<sub>2</sub>), 25.0 (CH(CH<sub>3</sub>)<sub>2</sub>), 24.5 (CH(CH<sub>3</sub>)<sub>2</sub>), 24.2 (C(CH<sub>3</sub>)<sub>2</sub>), 23.9 (CH(CH<sub>3</sub>)<sub>2</sub>), -10.2 (AsCH<sub>3</sub>). **IR ν [cm<sup>-1</sup>]**: 3038, 2958, 2925, 2867, 1551, 1524, 1460, 1435, 1383, 1316, 1287, 1253, 1177, 1100, 1057, 1018, 935, 860, 794, 758, 707, 639, 532, 448.

**10**: Yield 16 mg (47 %). M.p.: 192 °C (dec.). Anal. Calcd. for C<sub>59</sub>H<sub>85</sub>N<sub>4</sub>Cl<sub>2</sub>Ga<sub>2</sub>Sb: C, 59.93; H, 7.25; N, 4.74. Found: C, 60.8; H, 7.06; N, 4.47 %. **<sup>1</sup>H-NMR (C<sub>6</sub>D<sub>6</sub>, 400 MHz, 25 °C) δ [ppm]**: 6.93-7.15 (m, 12 H, C<sub>6</sub>H<sub>3</sub>), 4.91 (s, 2 H, γ-CH), 3.88 (sept, 2 H, <sup>3</sup>J<sub>HH</sub> = 6.8 Hz, CH(CH<sub>3</sub>)<sub>2</sub>), 3.58 (sept, 2 H, <sup>3</sup>J<sub>HH</sub> = 6.8 Hz, CH(CH<sub>3</sub>)<sub>2</sub>), 3.24 (sept, 2 H, <sup>3</sup>J<sub>HH</sub> = 6.8 Hz, CH(CH<sub>3</sub>)<sub>2</sub>), 3.16 (sept, 2 H, <sup>3</sup>J<sub>HH</sub> = 6.8 Hz, CH(CH<sub>3</sub>)<sub>2</sub>), 1.48-1.50 (m, 18 H, CCH<sub>3</sub>, CH(CH<sub>3</sub>)<sub>2</sub>), 1.29 (d, 6 H, <sup>3</sup>J<sub>HH</sub> = 6.8 Hz, CH(CH<sub>3</sub>)<sub>2</sub>), 1.19-1.23 (m, 24 H, CH(CH<sub>3</sub>)<sub>2</sub>), 0.97 (d, 12 H, <sup>3</sup>J<sub>HH</sub> = 6.8 Hz, CH(CH<sub>3</sub>)<sub>2</sub>), -0.32 (s, 3 H, CH<sub>3</sub>). **<sup>13</sup>C{<sup>1</sup>H}-NMR (C<sub>6</sub>D<sub>6</sub>, 150 MHz, 25 °C) δ [ppm]**: 168.9 (NCCH<sub>3</sub>), 168.7 (NCCH<sub>3</sub>), 146.4 (C<sub>6</sub>H<sub>3</sub>), 146.2 (C<sub>6</sub>H<sub>3</sub>), 143.1 (C<sub>6</sub>H<sub>3</sub>), 143.1 (C<sub>6</sub>H<sub>3</sub>), 142.1 (C<sub>6</sub>H<sub>3</sub>), 141.5 (C<sub>6</sub>H<sub>3</sub>), 127.6 (C<sub>6</sub>H<sub>3</sub>), 127.5 (C<sub>6</sub>H<sub>3</sub>), 125.5 (C<sub>6</sub>H<sub>3</sub>), 125.3 (C<sub>6</sub>H<sub>3</sub>), 123.7 (C<sub>6</sub>H<sub>3</sub>), 123.5 (C<sub>6</sub>H<sub>3</sub>), 98.7 (γ-CH), 30.1 (CH(CH<sub>3</sub>)<sub>2</sub>), 29.3 (CH(CH<sub>3</sub>)<sub>2</sub>), 28.8 (CH(CH<sub>3</sub>)<sub>2</sub>), 28.3 (CH(CH<sub>3</sub>)<sub>2</sub>), 28.0 (CH(CH<sub>3</sub>)<sub>2</sub>), 27.7 (CH(CH<sub>3</sub>)<sub>2</sub>), 25.2 (CH(CH<sub>3</sub>)<sub>2</sub>), 24.8 (CH(CH<sub>3</sub>)<sub>2</sub>), 24.6 (CH(CH<sub>3</sub>)<sub>2</sub>), 24.4 (CH(CH<sub>3</sub>)<sub>2</sub>), 24.1 (C(CH<sub>3</sub>)<sub>2</sub>), 24.1 (C(CH<sub>3</sub>)<sub>2</sub>), 23.9 (CH(CH<sub>3</sub>)<sub>2</sub>), 23.5 (CH(CH<sub>3</sub>)<sub>2</sub>), -30.0 (SbCH<sub>3</sub>). **IR ν [cm<sup>-1</sup>]**: 3059, 2961, 2928, 2867, 1551, 1523, 1460, 1435, 1382, 1316, 1287, 1258, 1195, 1177, 1093, 1016, 937, 862, 792, 757, 705, 638, 530, 500, 451, 401.



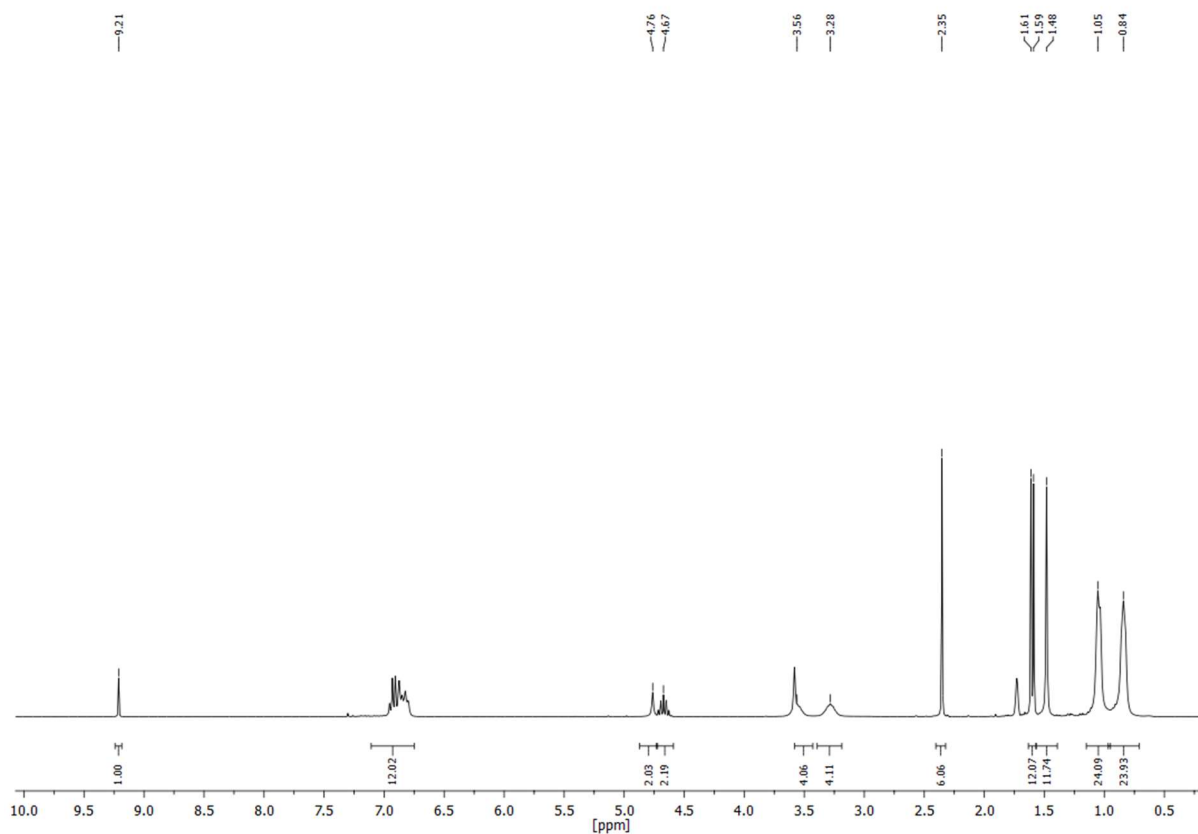

**Fig. S1.** <sup>1</sup>H NMR spectrum of [[LGa(Cl)<sub>2</sub>As][IPrH] (1) in THF-*d*<sub>8</sub>.

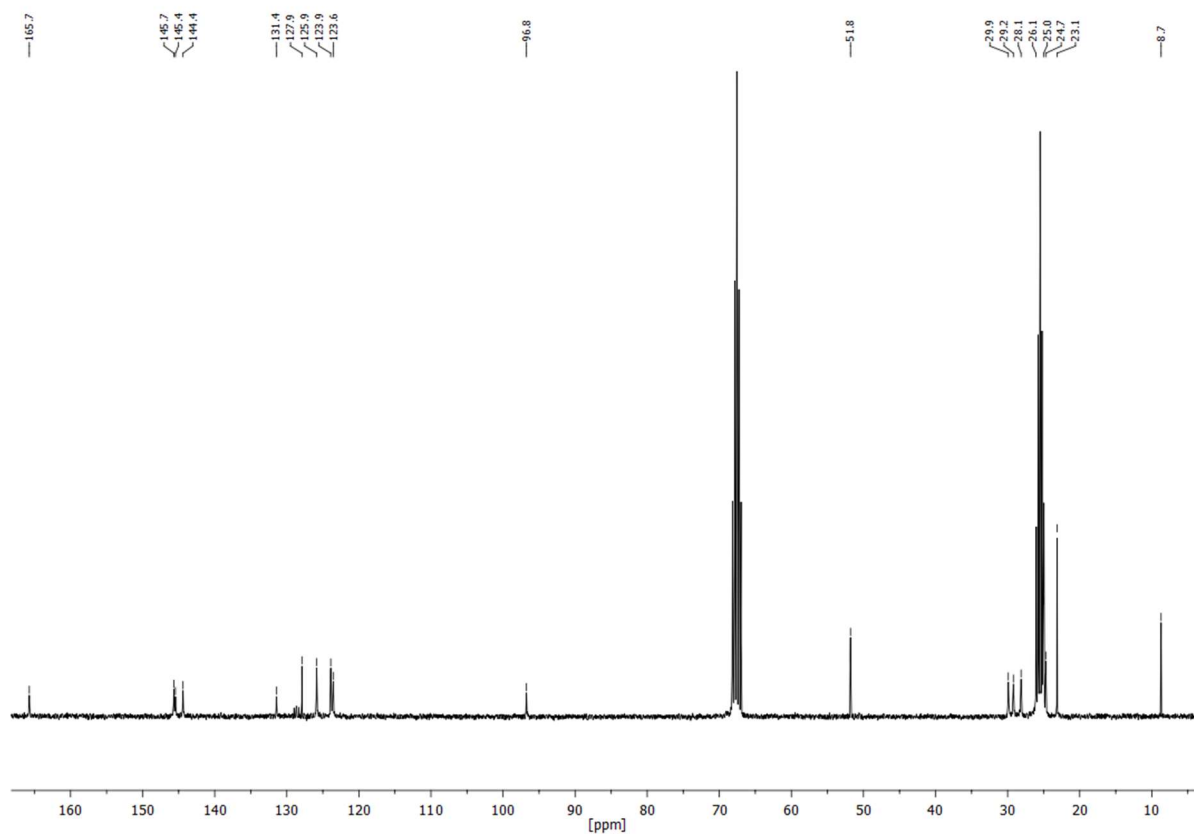

**Fig. S2.** <sup>13</sup>C NMR spectrum of [[LGa(Cl)<sub>2</sub>As][IPrH] (1) in THF-*d*<sub>8</sub>.

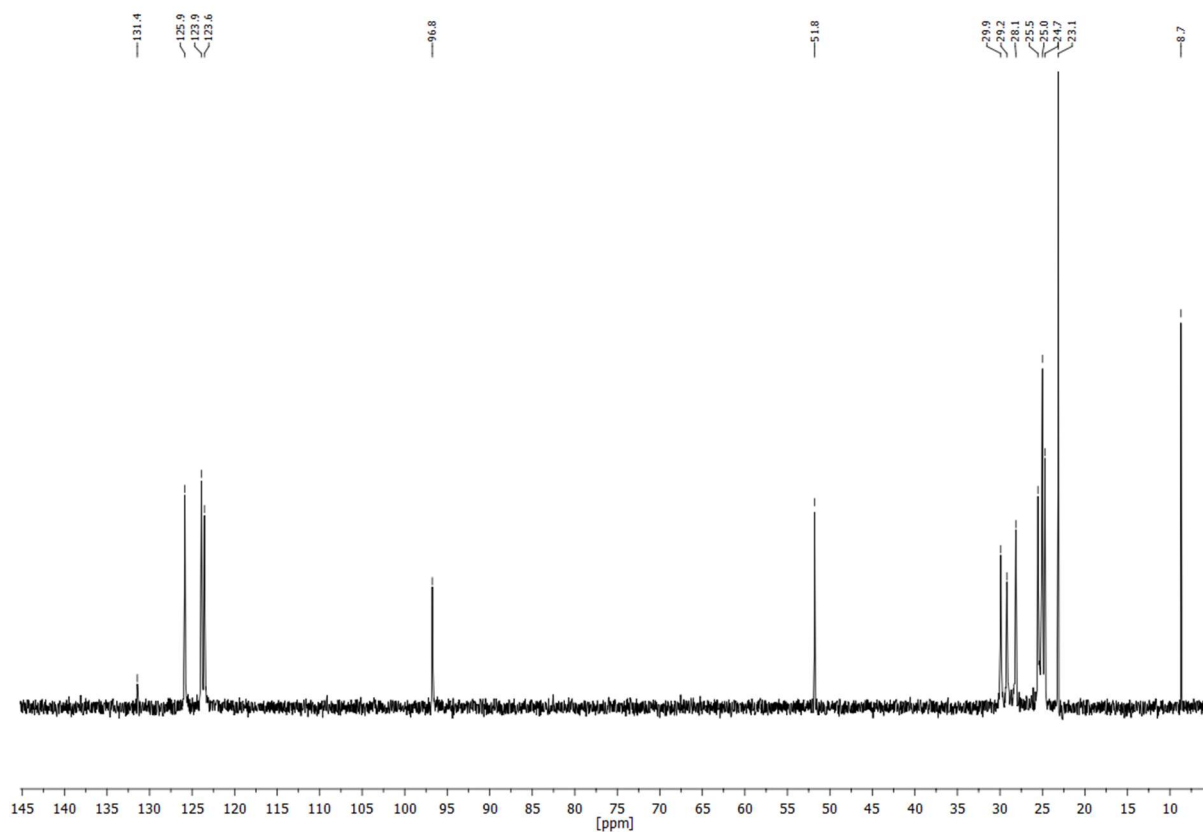

**Fig. S3.** DEPT135 spectrum of  $[[\text{LGa}(\text{Cl})_2\text{As}][\text{IPrH}]$  (**1**) in  $\text{THF-}d_8$ .

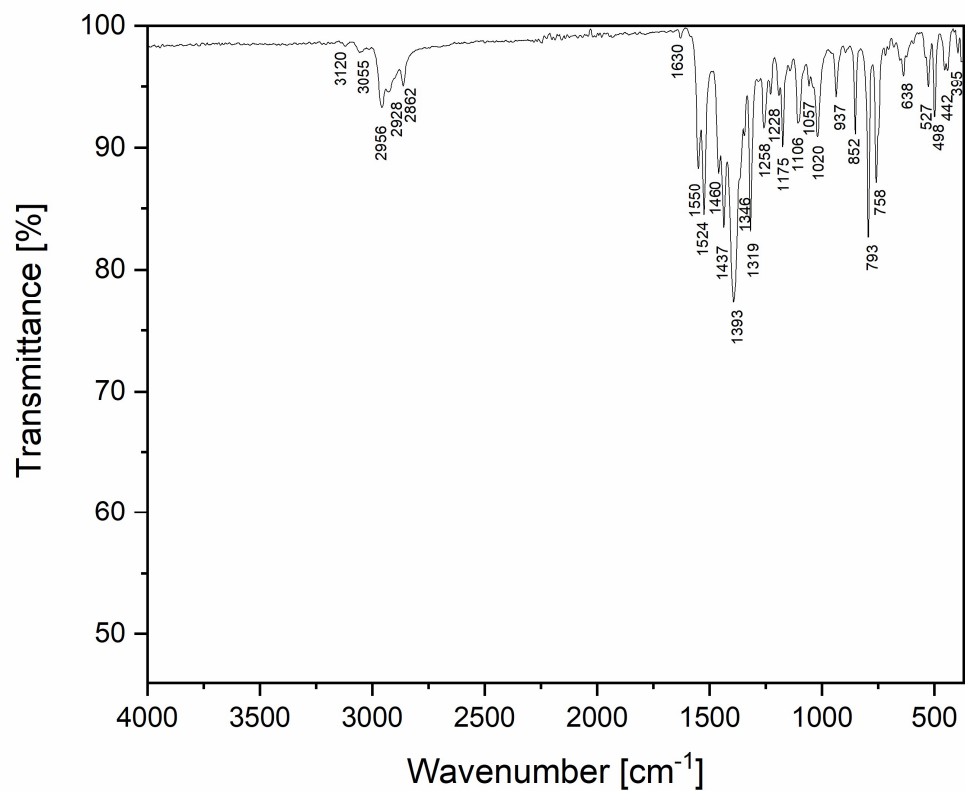

**Fig. S4.** ATR-IR spectrum of  $[[\text{LGa}(\text{Cl})_2\text{As}][\text{IPrH}]$  (**1**).

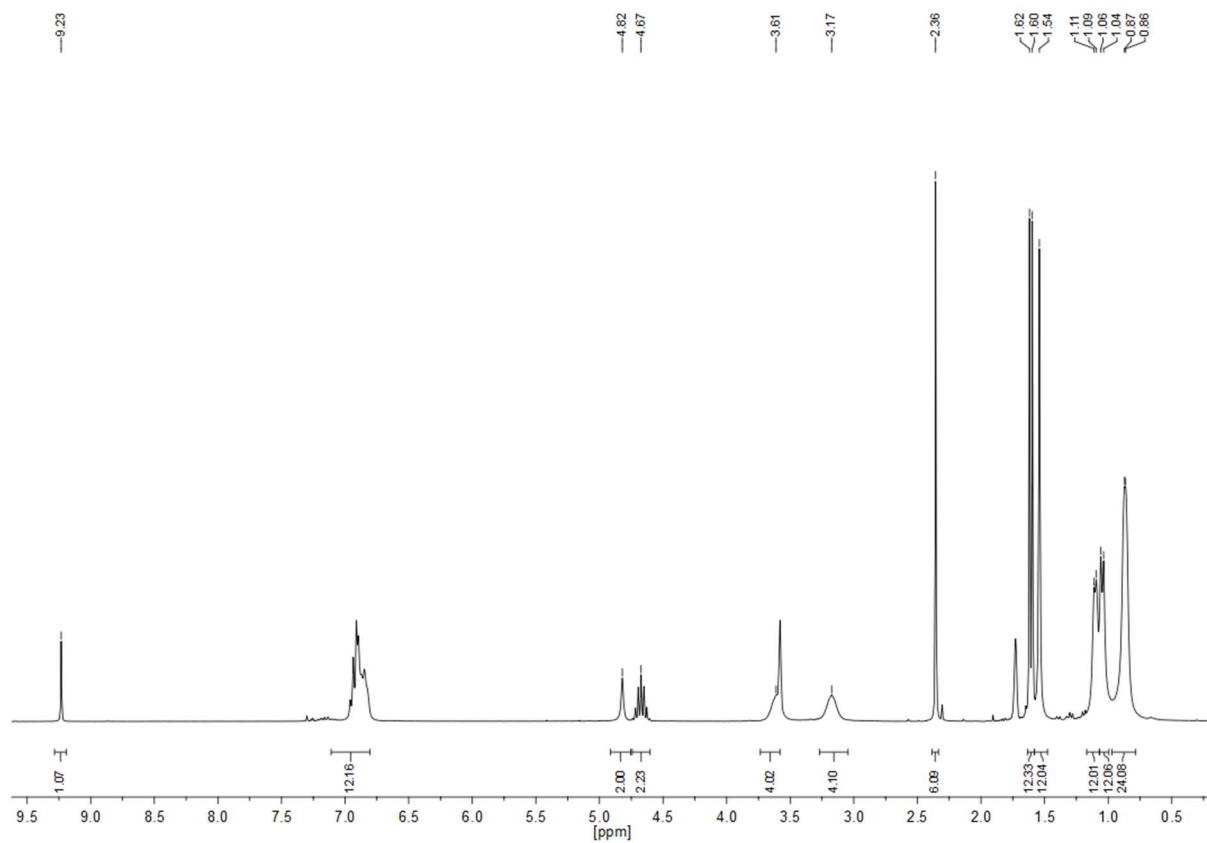

**Fig. S5.**  $^1\text{H}$  NMR spectrum of  $[[\text{LGa}(\text{Cl})_2\text{Sb}][\text{IPrH}]$  (**2**) in  $\text{THF-}d_8$ .

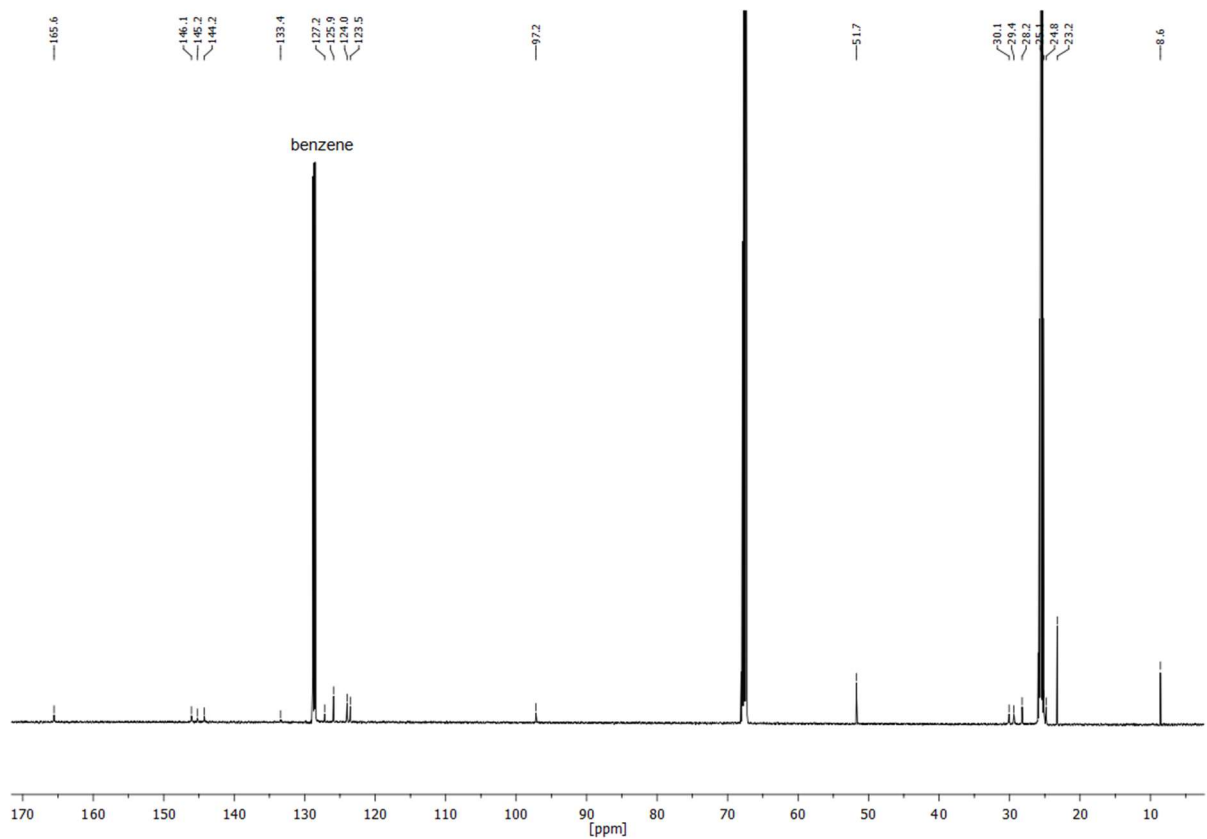

**Fig. S6.**  $^{13}\text{C}$  NMR spectrum of  $[[\text{LGa}(\text{Cl})_2\text{Sb}][\text{IPrH}]$  (**2**) in  $\text{THF-}d_8$ .

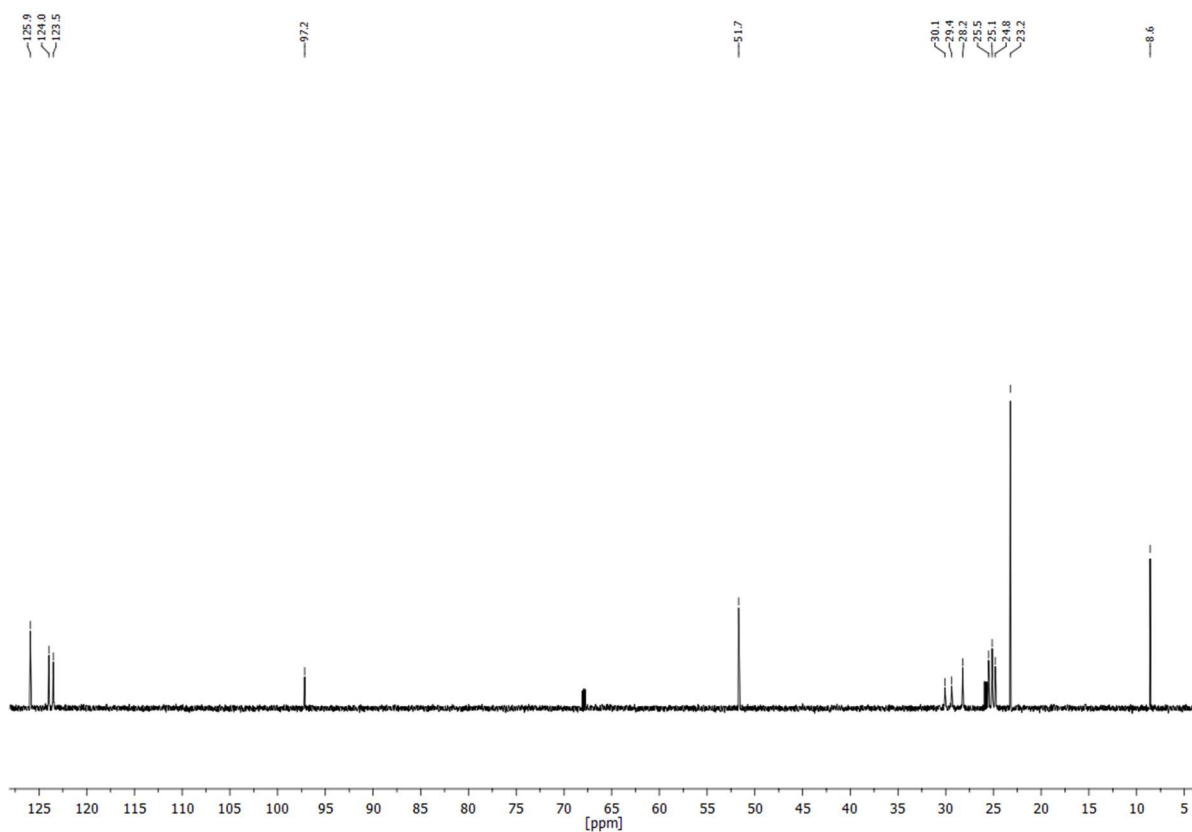

**Fig. S7.** DEPT135 spectrum of  $[[\text{LGa}(\text{Cl})_2\text{Sb}][\text{IPrH}]$  (**2**) in  $\text{THF-}d_8$ .

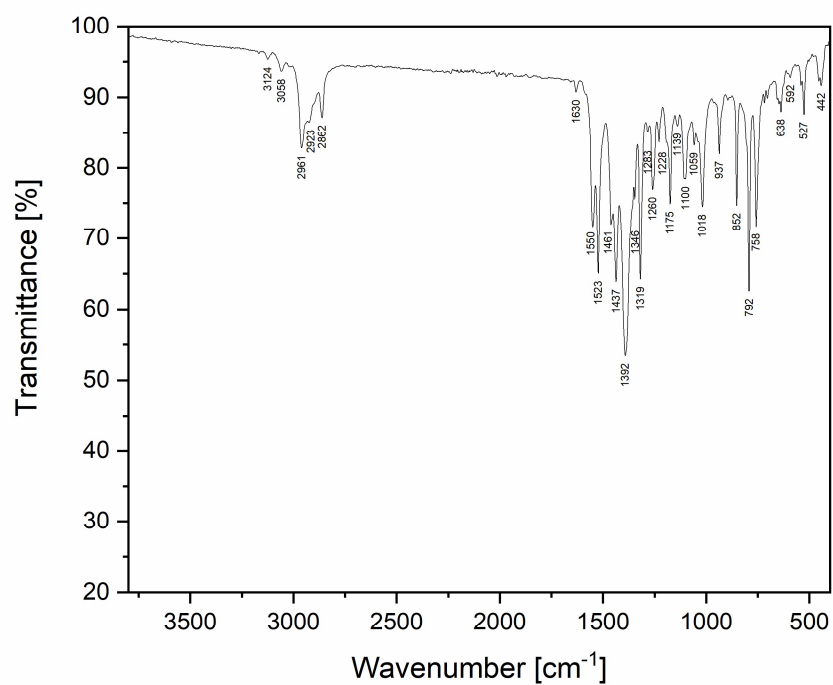

**Fig. S8.** ATR-IR spectrum of  $[[\text{LGa}(\text{Cl})_2\text{Sb}][\text{IPrH}]$  (**2**).

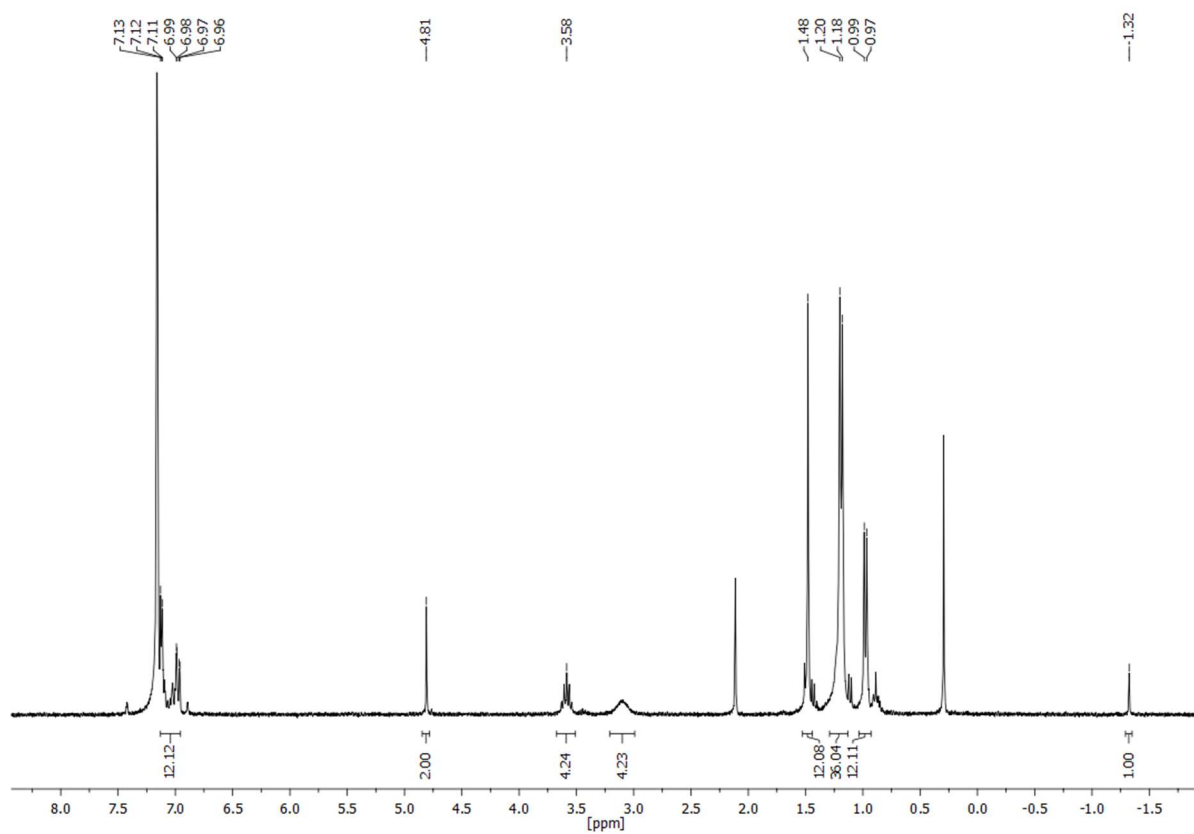

**Fig. S9.**  $^1\text{H}$  NMR spectrum of  $[\text{LGa}(\text{Cl})_2\text{AsH}$  (**5**) in  $\text{C}_6\text{D}_6$ .

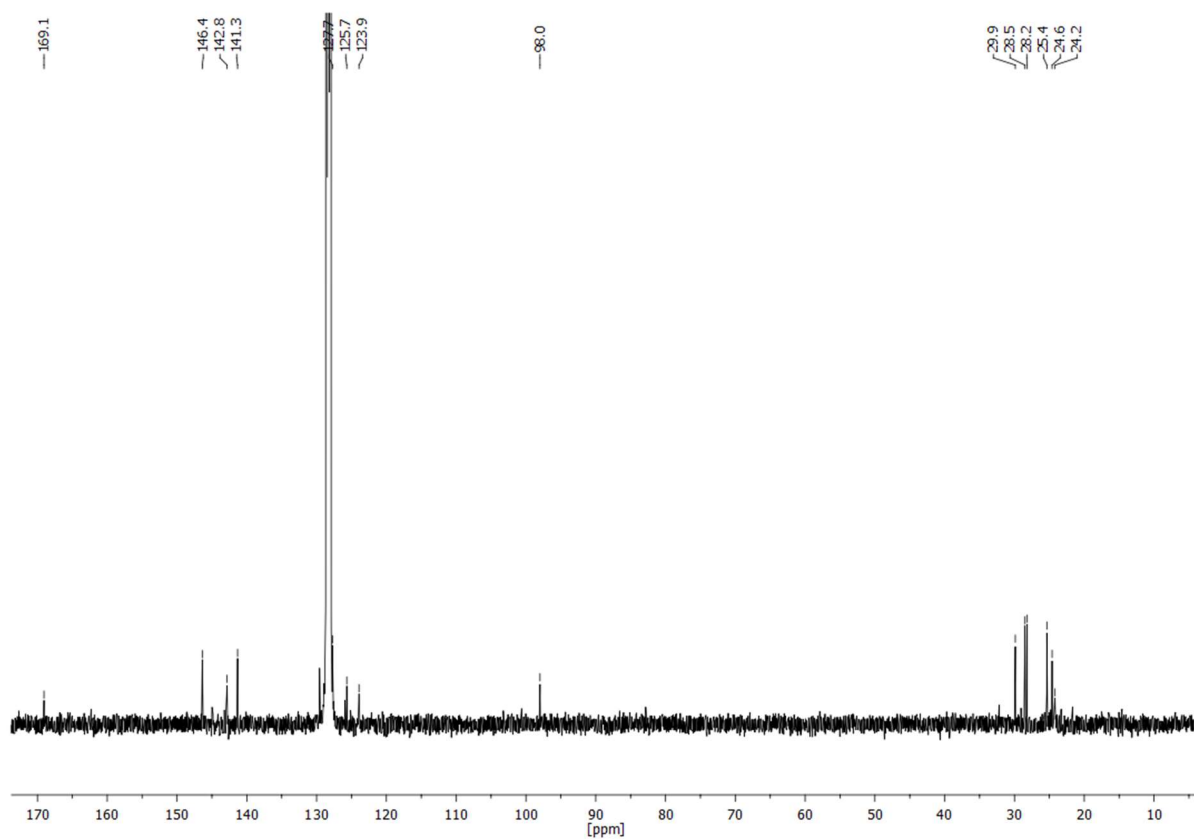

**Fig. S10.**  $^{13}\text{C}$  NMR spectrum of  $[\text{LGa}(\text{Cl})_2\text{AsH}$  (**5**) in  $\text{C}_6\text{D}_6$ .

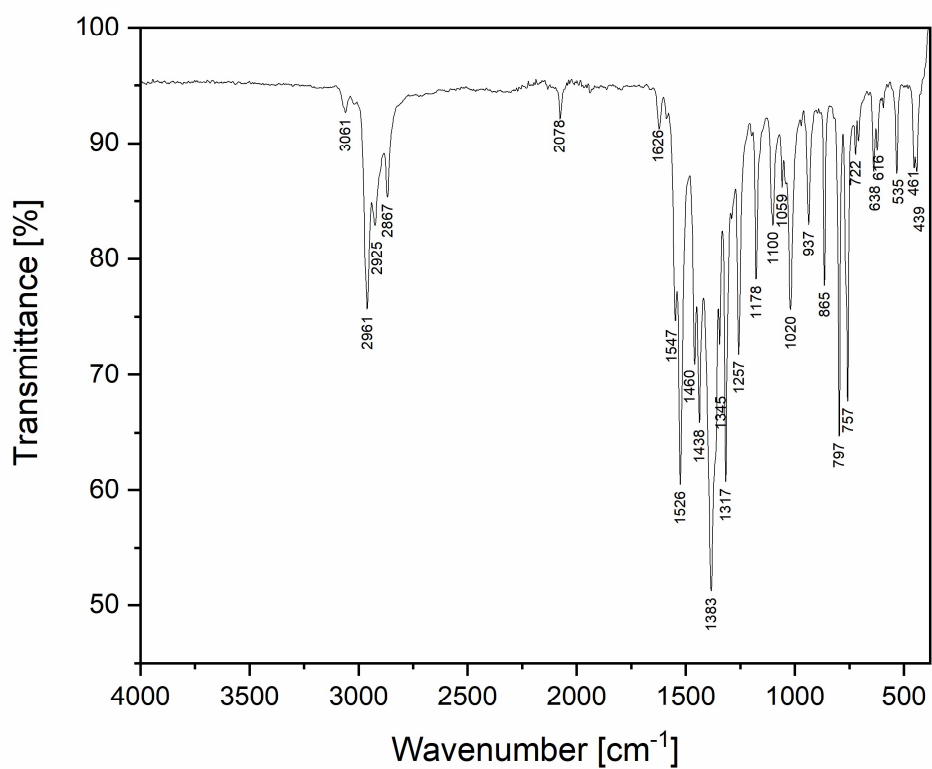

Fig. S11. ATR IR spectrum of [LGa(Cl)]<sub>2</sub>AsH (5).

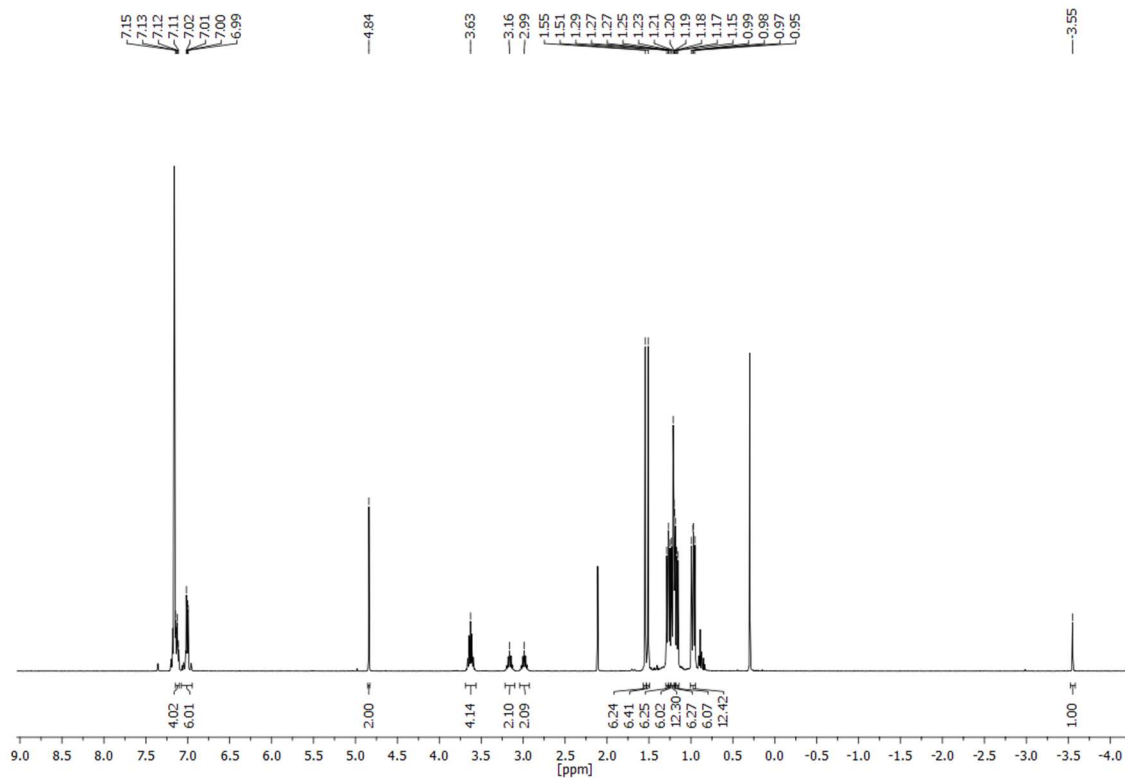

Fig. S12. <sup>1</sup>H NMR spectrum of [LGa(Cl)]<sub>2</sub>SbH (6) in C<sub>6</sub>D<sub>6</sub>.

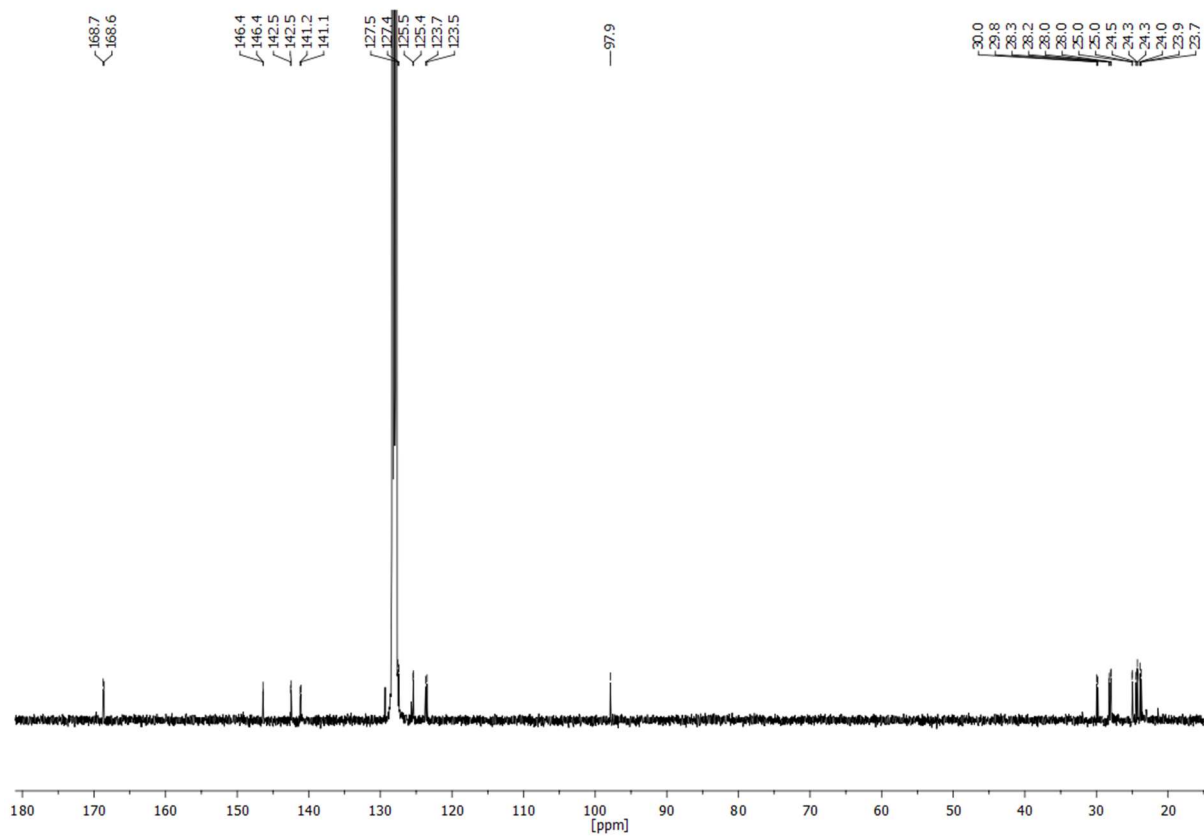

Fig. S13.  $^{13}\text{C}$  NMR spectrum of  $[\text{LGa}(\text{Cl})_2\text{SbH}$  (**6**) in  $\text{C}_6\text{D}_6$ .

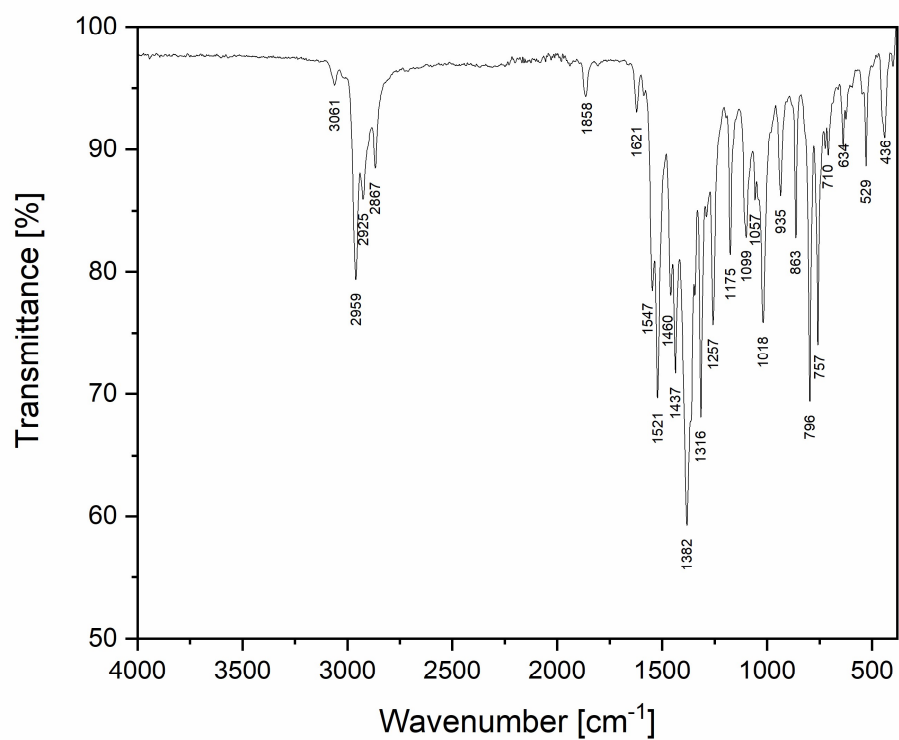

Fig. S14. ATR IR spectrum of  $[\text{LGa}(\text{Cl})_2\text{SbH}$  (**6**).

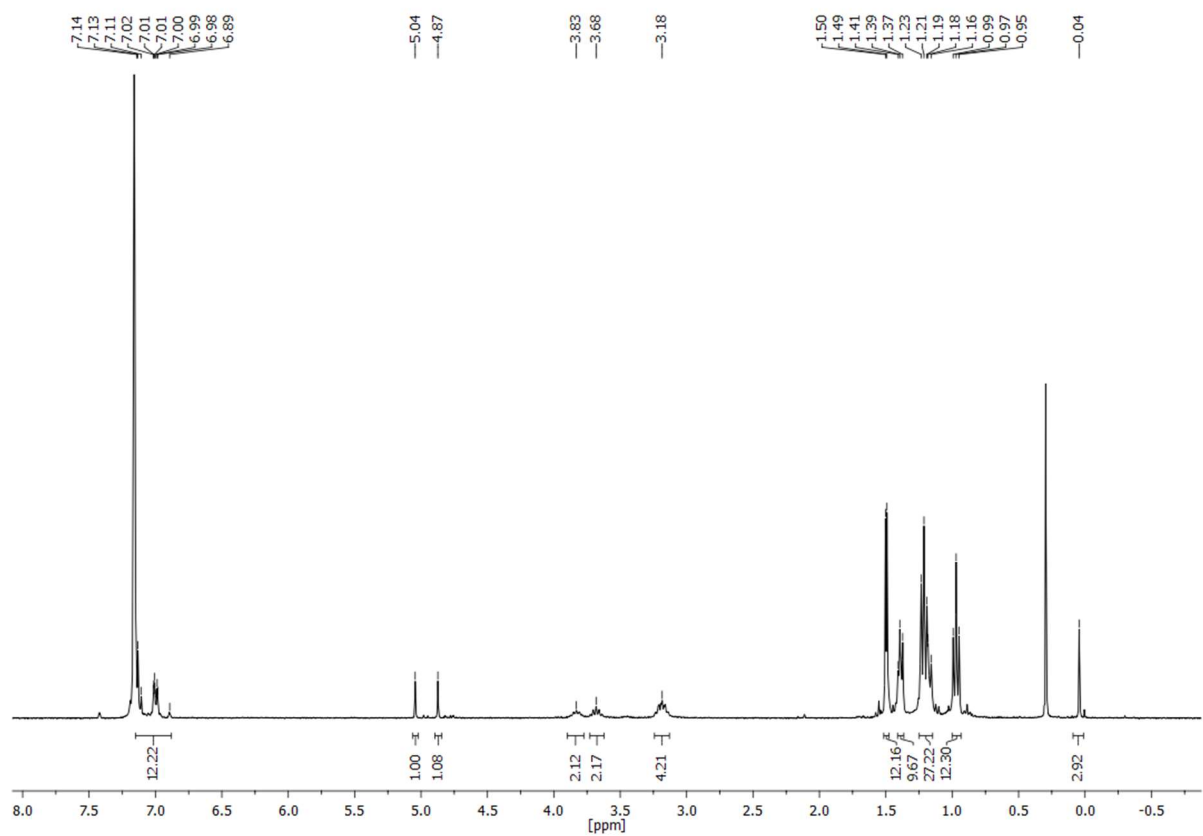

**Fig. S15.**  $^1\text{H}$  NMR spectrum of  $\text{LGa}(\text{Cl})\text{As}(\text{Me})\text{Ga}(\text{I})\text{L}$  (**7**) in  $\text{C}_6\text{D}_6$ .

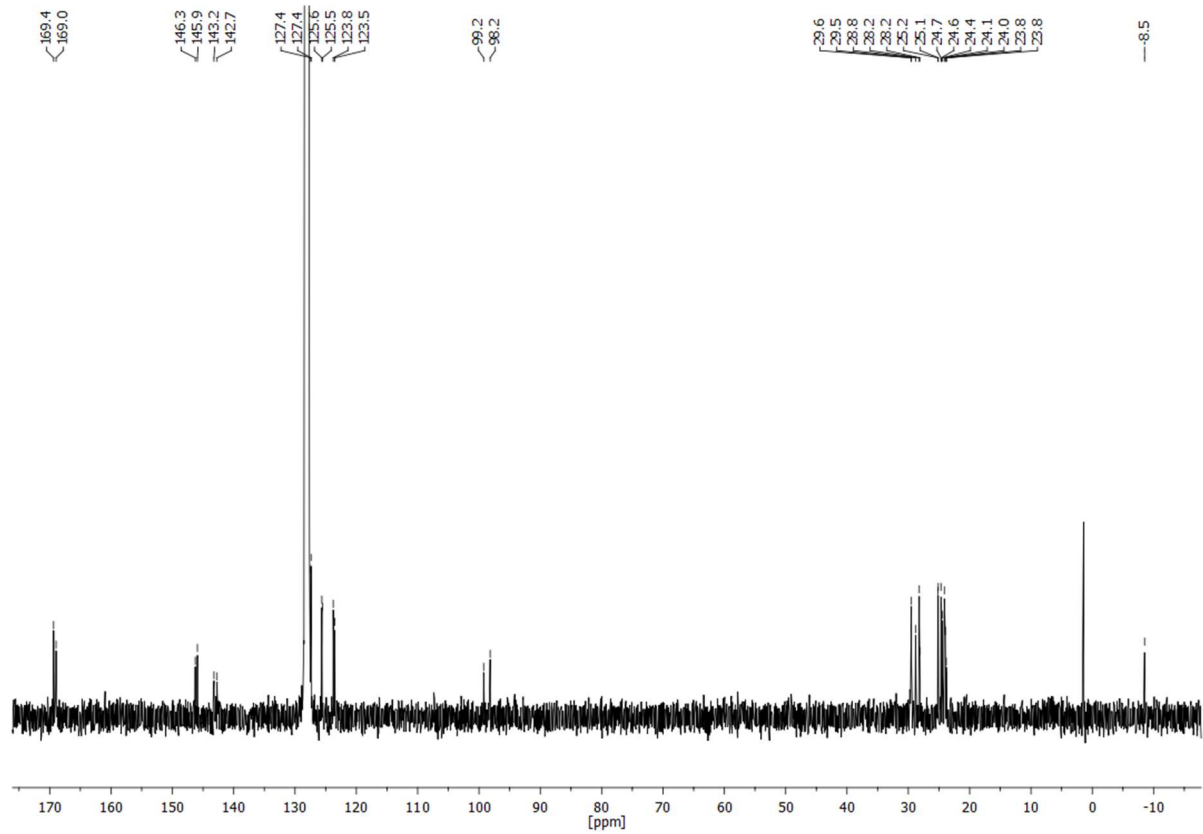

**Fig. S16.**  $^{13}\text{C}$  NMR spectrum of  $\text{LGa}(\text{Cl})\text{As}(\text{Me})\text{Ga}(\text{I})\text{L}$  (**7**) in  $\text{C}_6\text{D}_6$ .



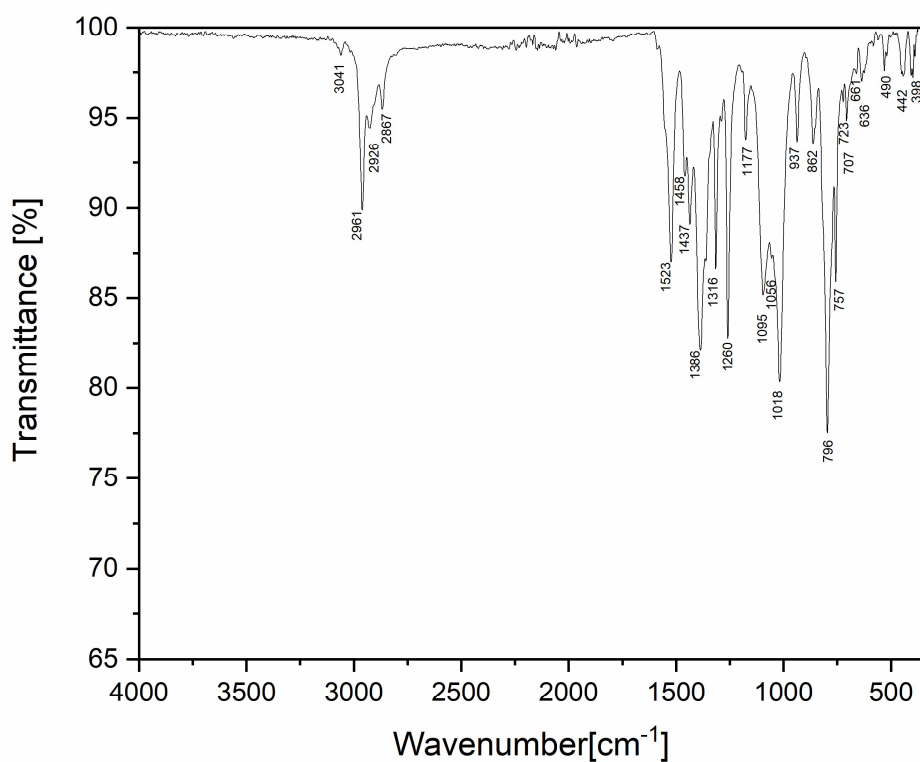

Fig. S17. ATR-IR spectrum of LGa(Cl)As(Me)Ga(I)L (7).

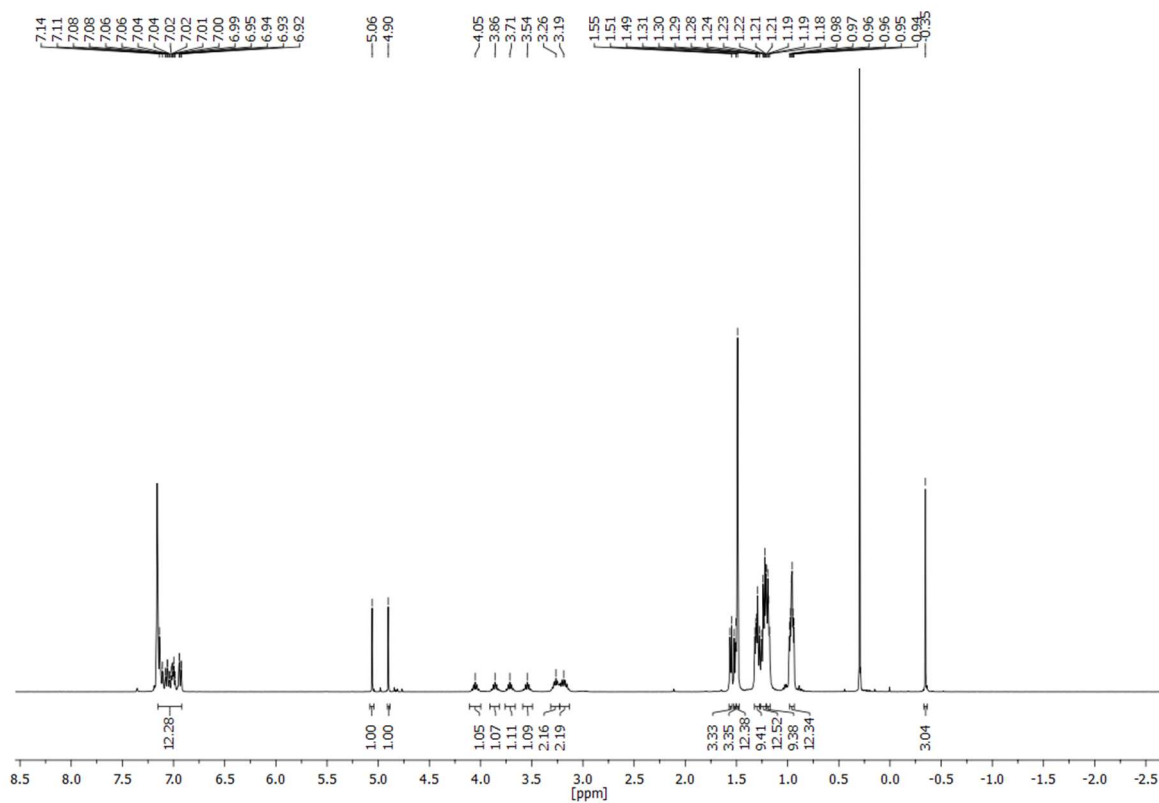

Fig. S18.  $^1\text{H}$  NMR spectrum of LGa(Cl)Sb(Me)Ga(I)L (8) in  $\text{C}_6\text{D}_6$ .

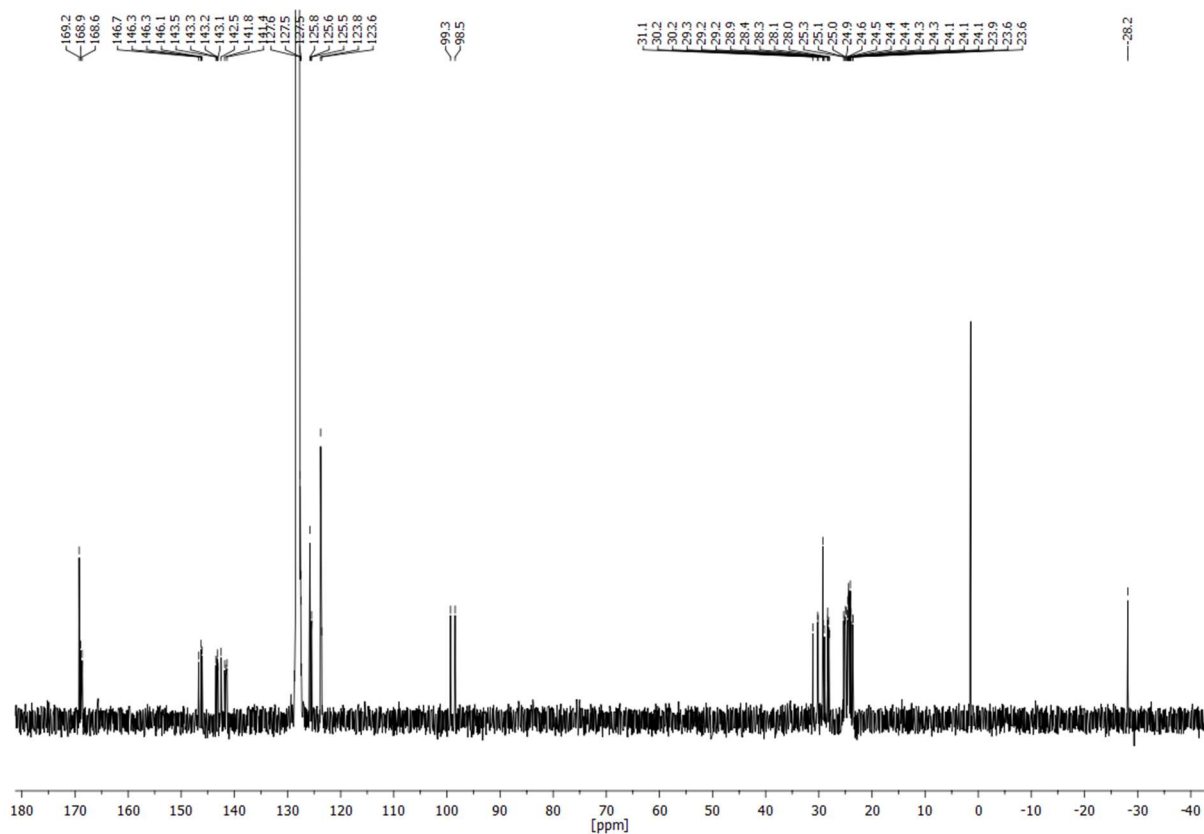

**Fig. S19.**  $^{13}\text{C}$  NMR spectrum of  $\text{LGa}(\text{Cl})\text{Sb}(\text{Me})\text{Ga}(\text{I})\text{L}$  (**8**) in  $\text{C}_6\text{D}_6$ .

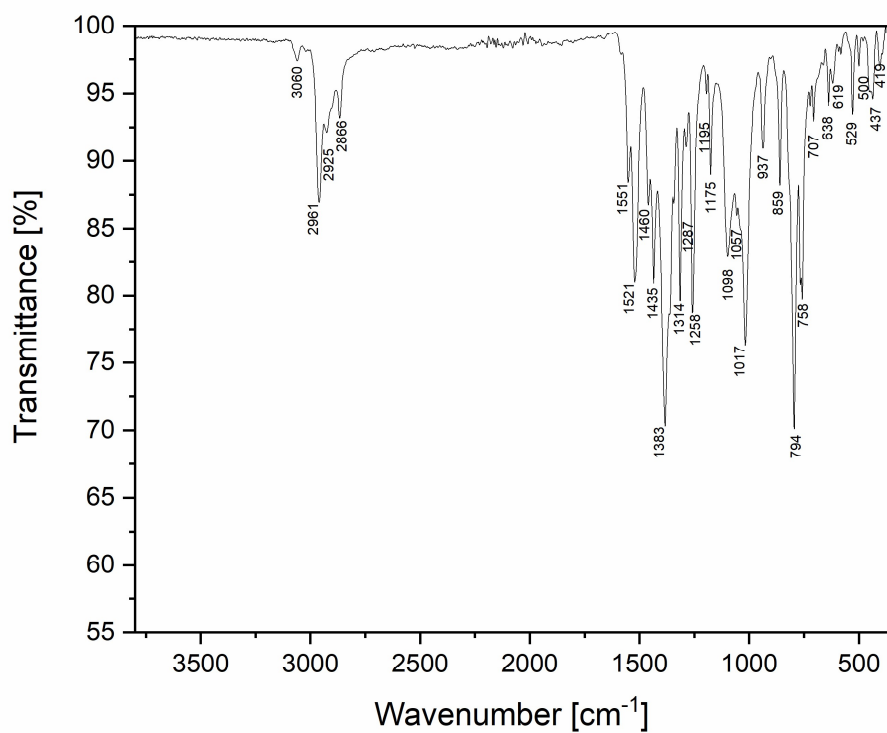

**Fig. S20.** ATR-IR spectrum of  $\text{LGa}(\text{Cl})\text{Sb}(\text{Me})\text{Ga}(\text{I})\text{L}$  (**8**).

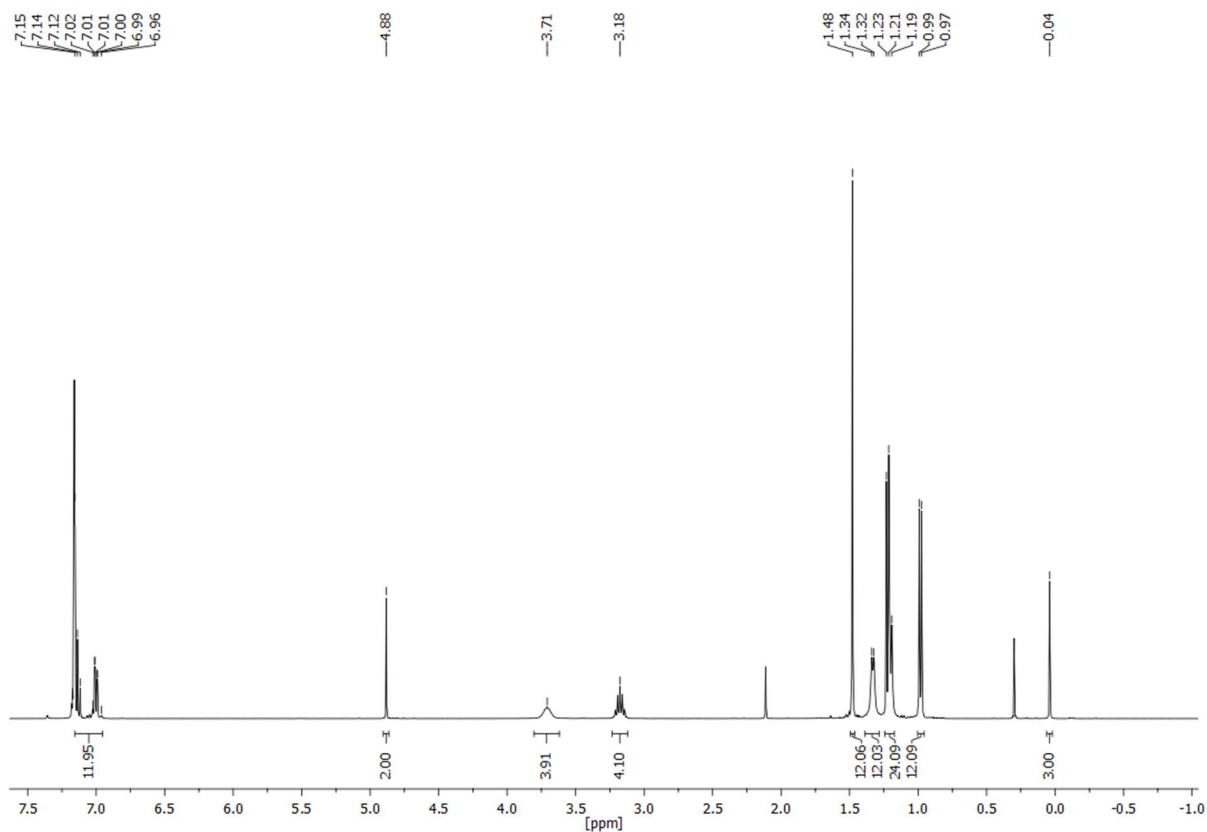

Fig. S21.  $^1\text{H}$  NMR spectrum of  $[\text{LGa}(\text{Cl})_2\text{AsMe}$  (**9**) in  $\text{C}_6\text{D}_6$ .

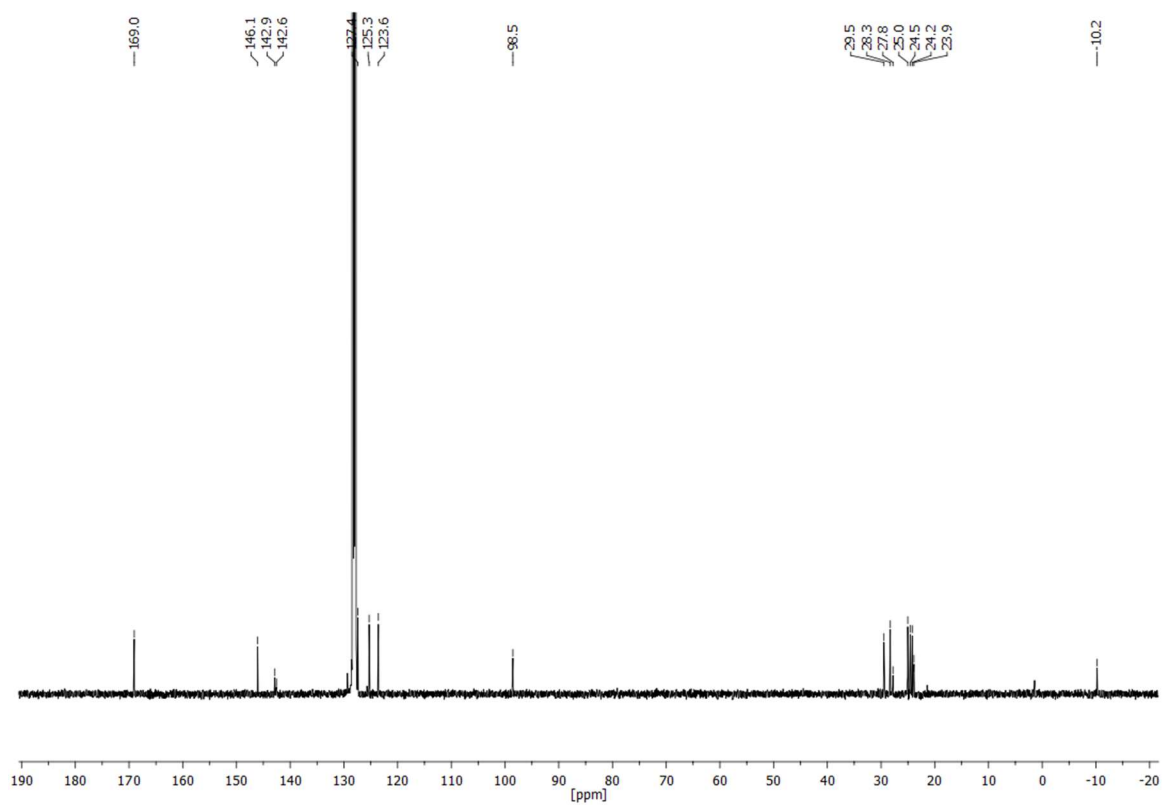

Fig. S22.  $^{13}\text{C}$  NMR spectrum of  $[\text{LGa}(\text{Cl})_2\text{AsMe}$  (**9**) in  $\text{C}_6\text{D}_6$ .

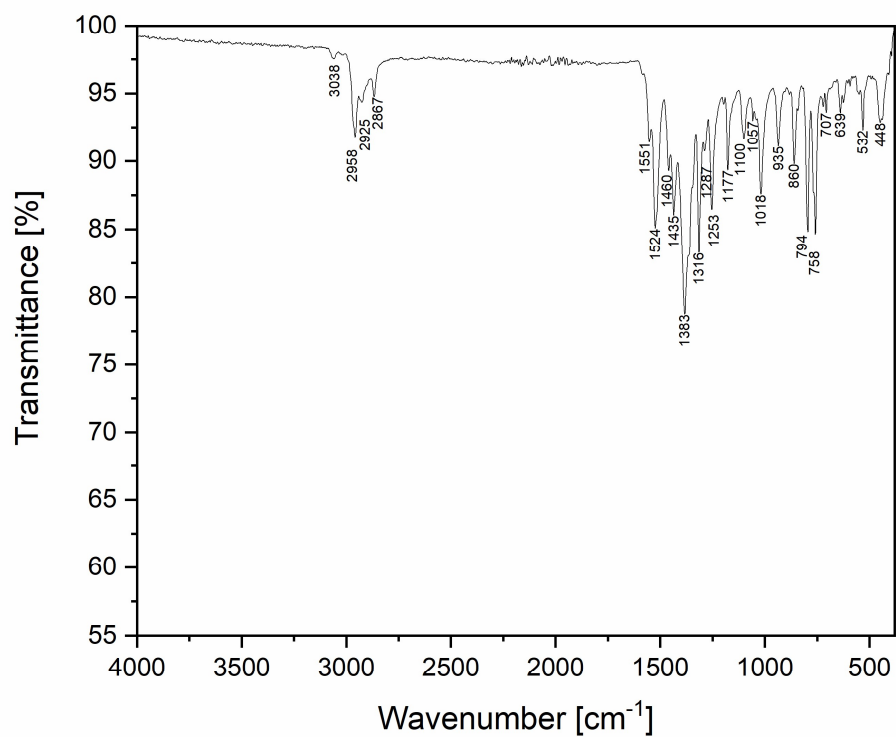

Fig. S23. ATR-IR spectrum of [LGa(Cl)<sub>2</sub>]AsMe (**9**).

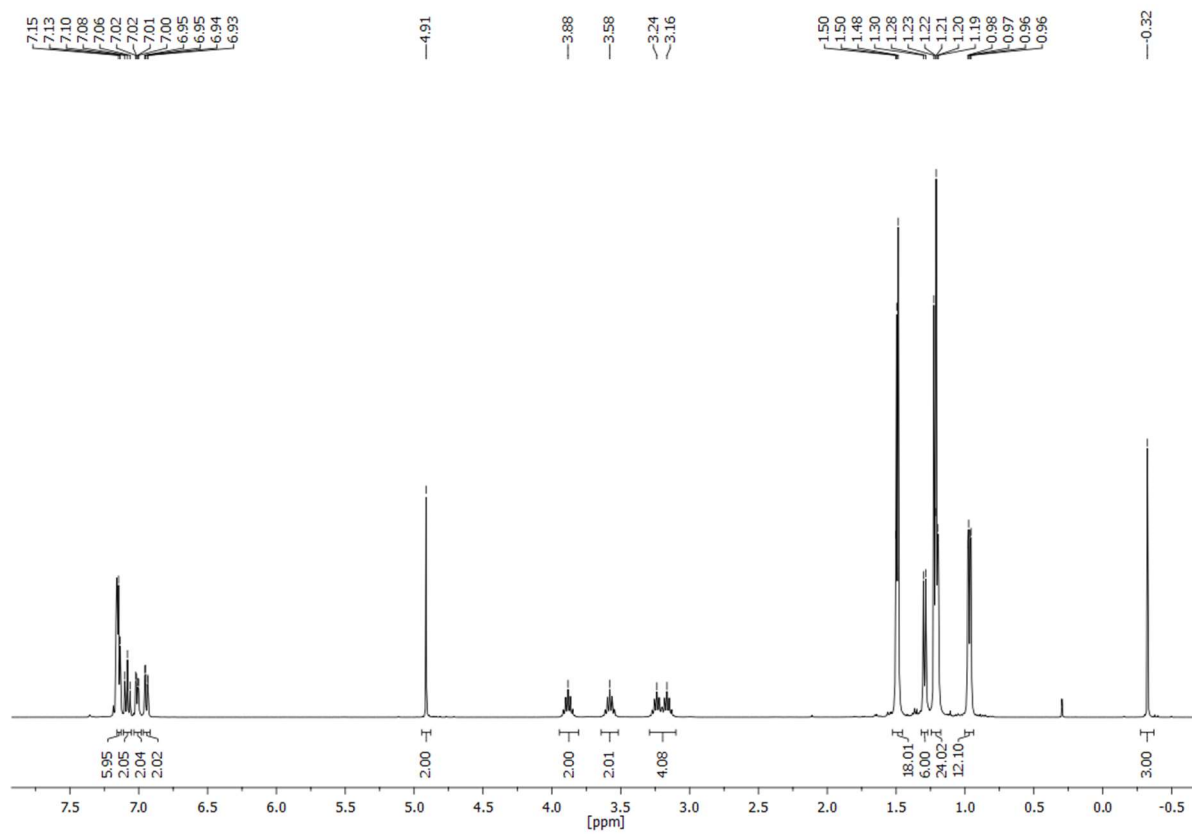

Fig. S24. <sup>1</sup>H NMR spectrum of [LGa(Cl)<sub>2</sub>]SbMe (**10**) in C<sub>6</sub>D<sub>6</sub>.

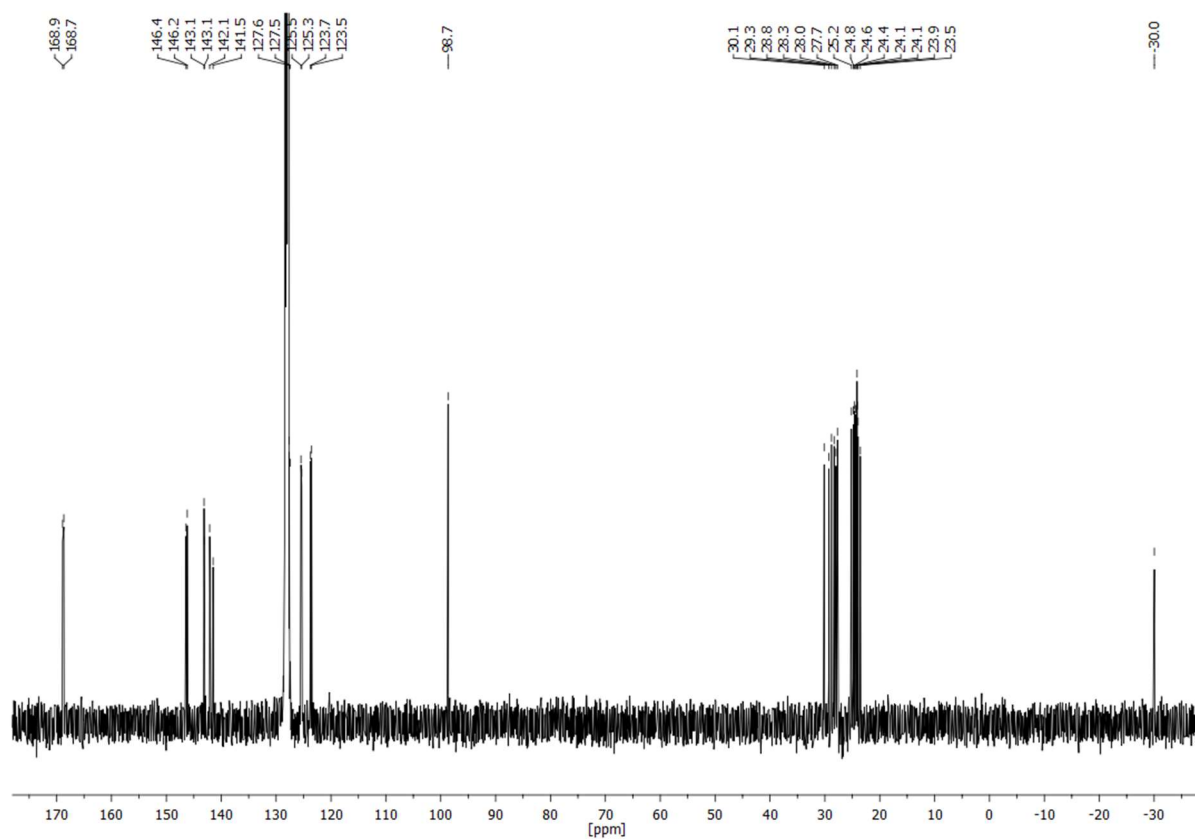

Fig. S25.  $^{13}\text{C}$  NMR spectrum of  $[\text{LGa}(\text{Cl})_2\text{SbMe}]$  (**10**) in  $\text{C}_6\text{D}_6$ .

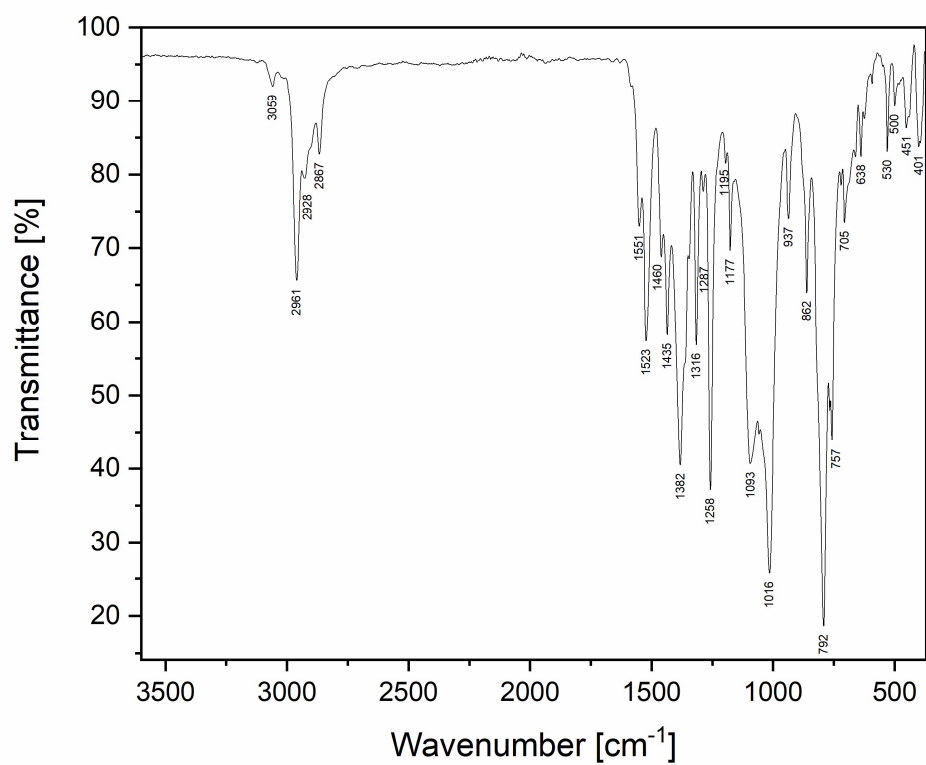

Fig. S26. ATR-IR spectrum of  $[\text{LGa}(\text{Cl})_2\text{SbMe}]$  (**10**).

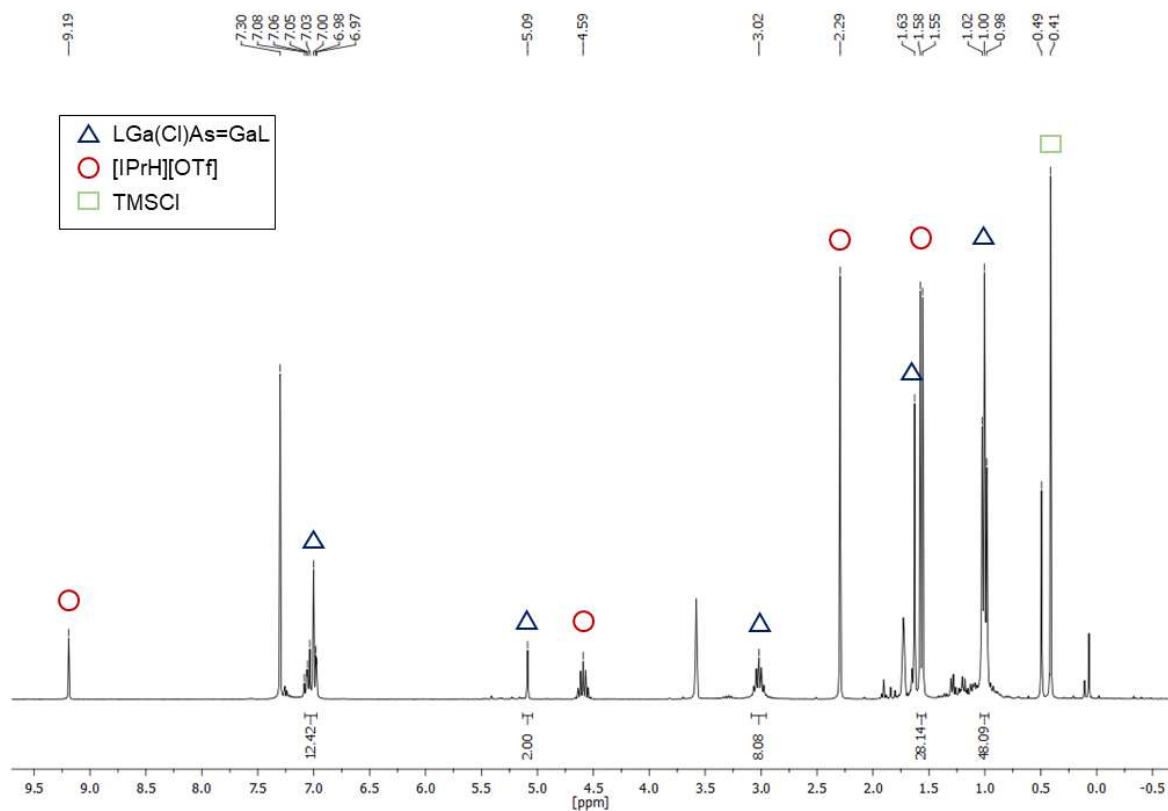

**Fig. S27.**  $^1\text{H}$  NMR spectrum of the reaction of  $[[\text{LGa}(\text{Cl})_2\text{As}][\text{IPrH}]$  with TMSOTf in  $\text{THF-}d_8$ .

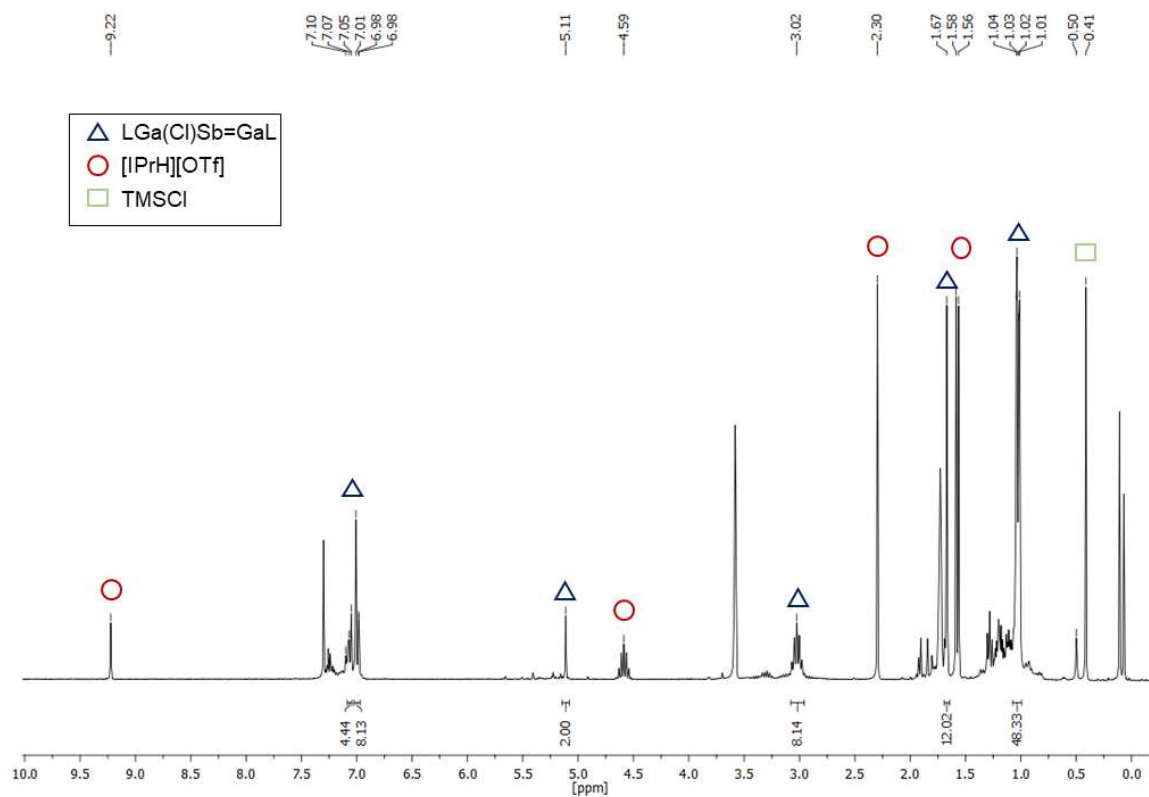

**Fig. S28.**  $^1\text{H}$  NMR spectrum of the reaction of  $[[\text{LGa}(\text{Cl})_2\text{Sb}][\text{IPrH}]$  with TMSOTf in  $\text{THF-}d_8$ .

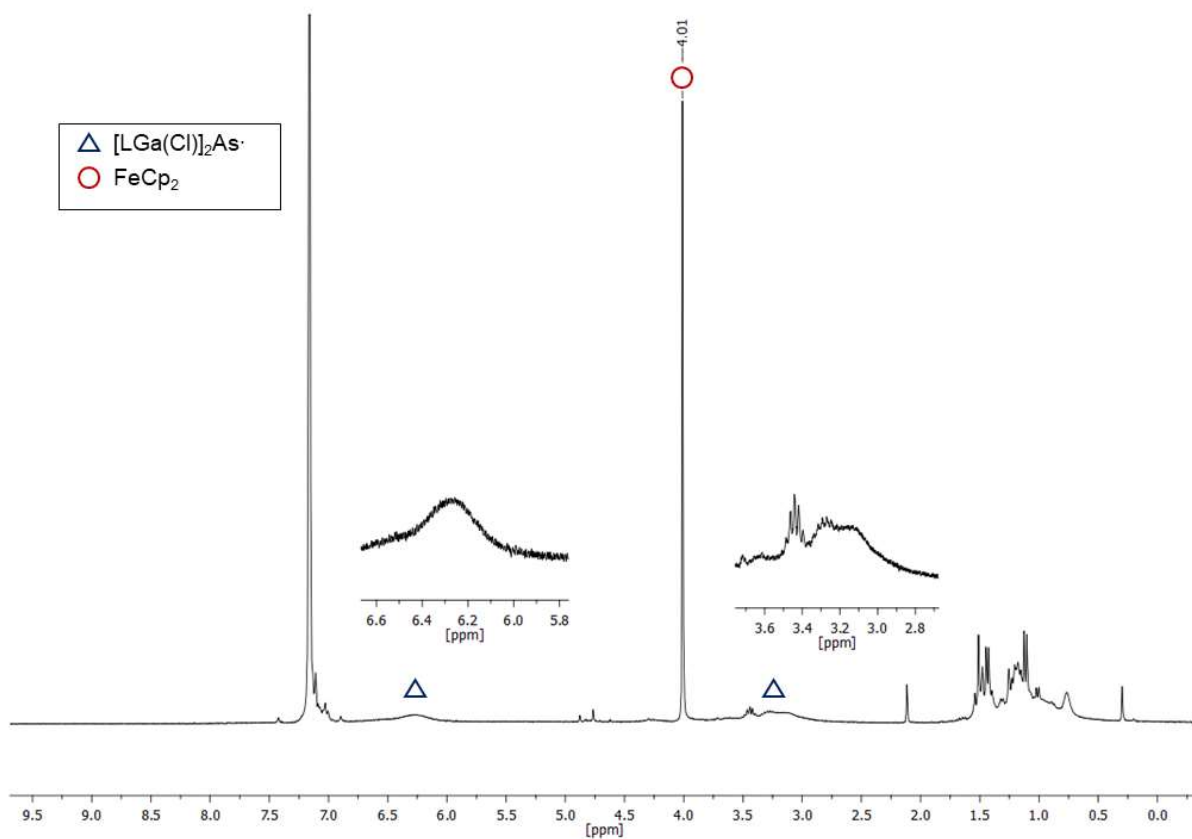

**Fig. S29.**  $^1\text{H}$  NMR spectrum of the reaction of  $[[\text{LGa}(\text{Cl})_2\text{As}][\text{IPrH}]$  with  $[\text{FeCp}_2][\text{BARF}_4]$  in  $\text{C}_6\text{D}_6$ .

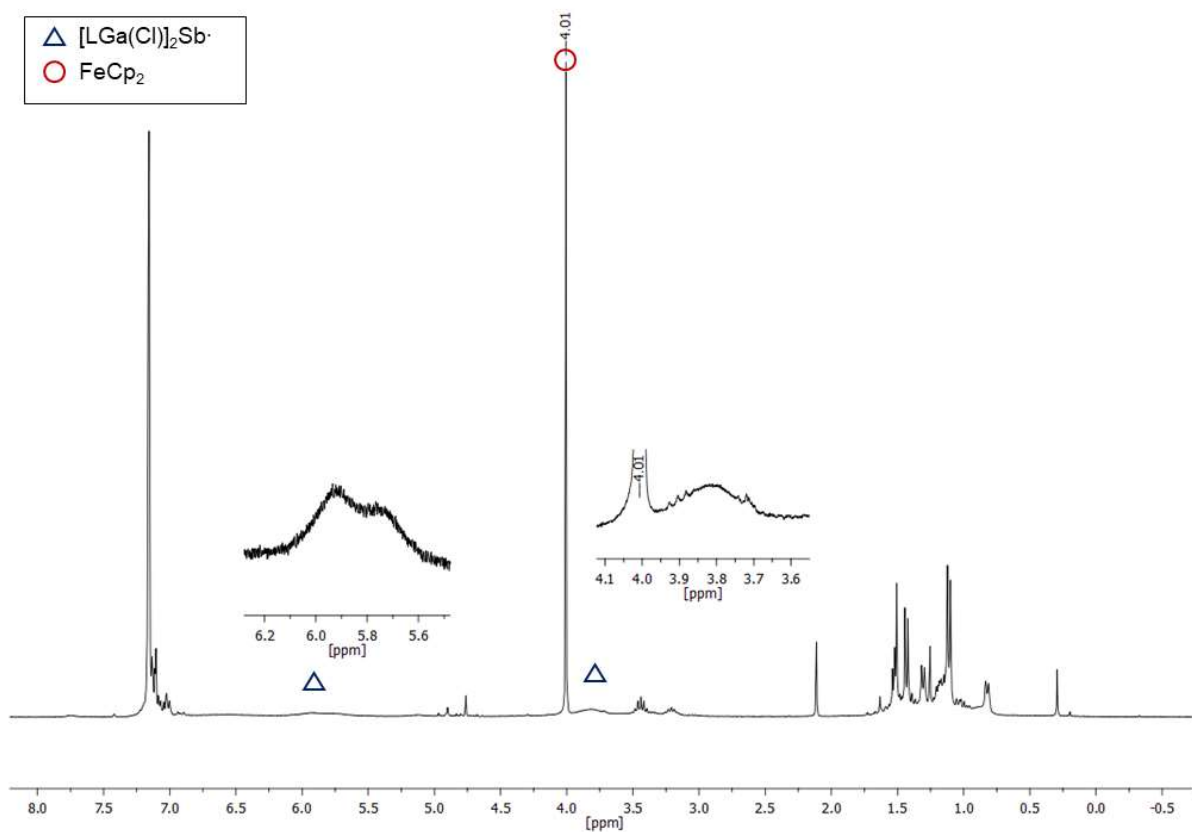

**Fig. S30.**  $^1\text{H}$  NMR spectrum of the reaction of  $[[\text{LGa}(\text{Cl})_2\text{Sb}][\text{IPrH}]$  with  $[\text{FeCp}_2][\text{BARF}_4]$  in  $\text{C}_6\text{D}_6$ .

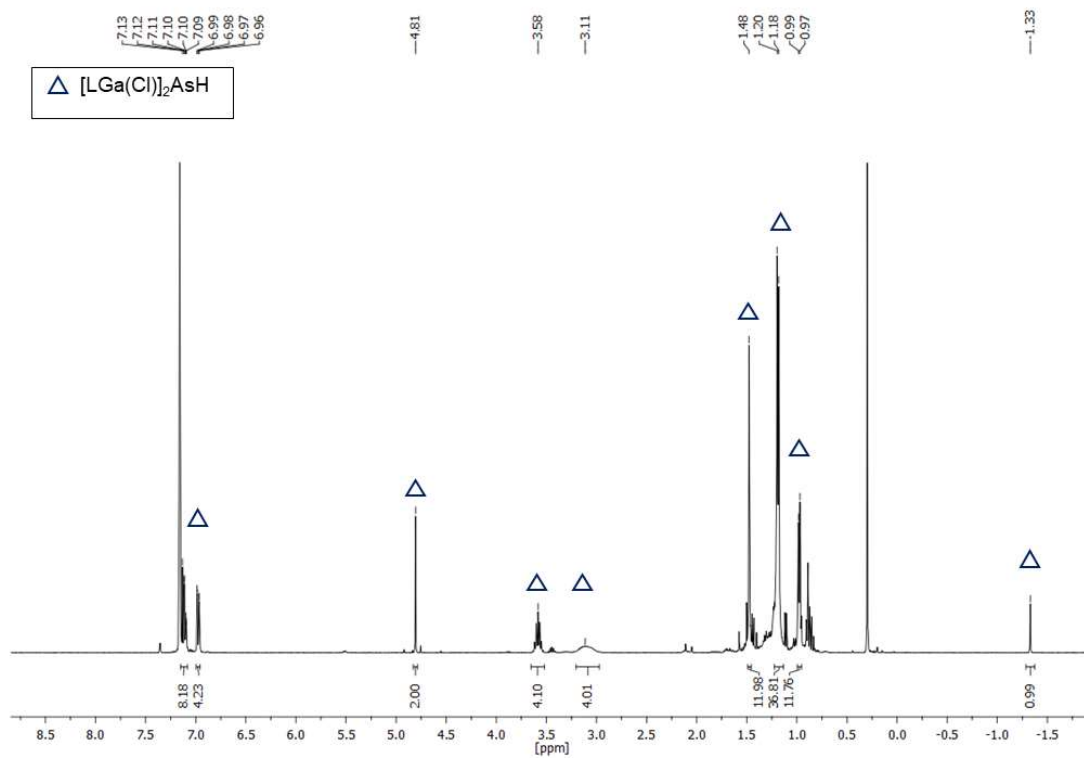

Fig. S31. <sup>1</sup>H NMR spectrum of the reaction of LGa(Cl)AsGaL with HCl in C<sub>6</sub>D<sub>6</sub>.

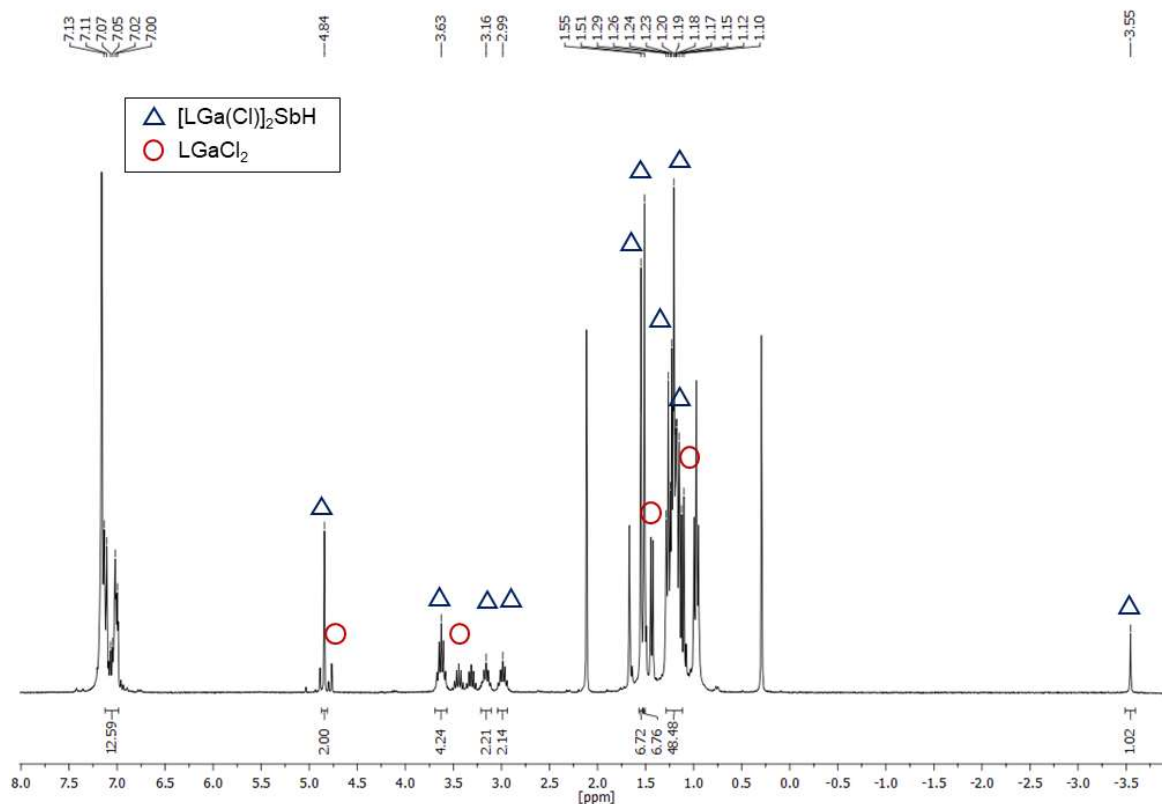

Fig. S32. In situ <sup>1</sup>H NMR spectrum of the reaction of LGa(Cl)SbGaL with HCl in C<sub>6</sub>D<sub>6</sub>.





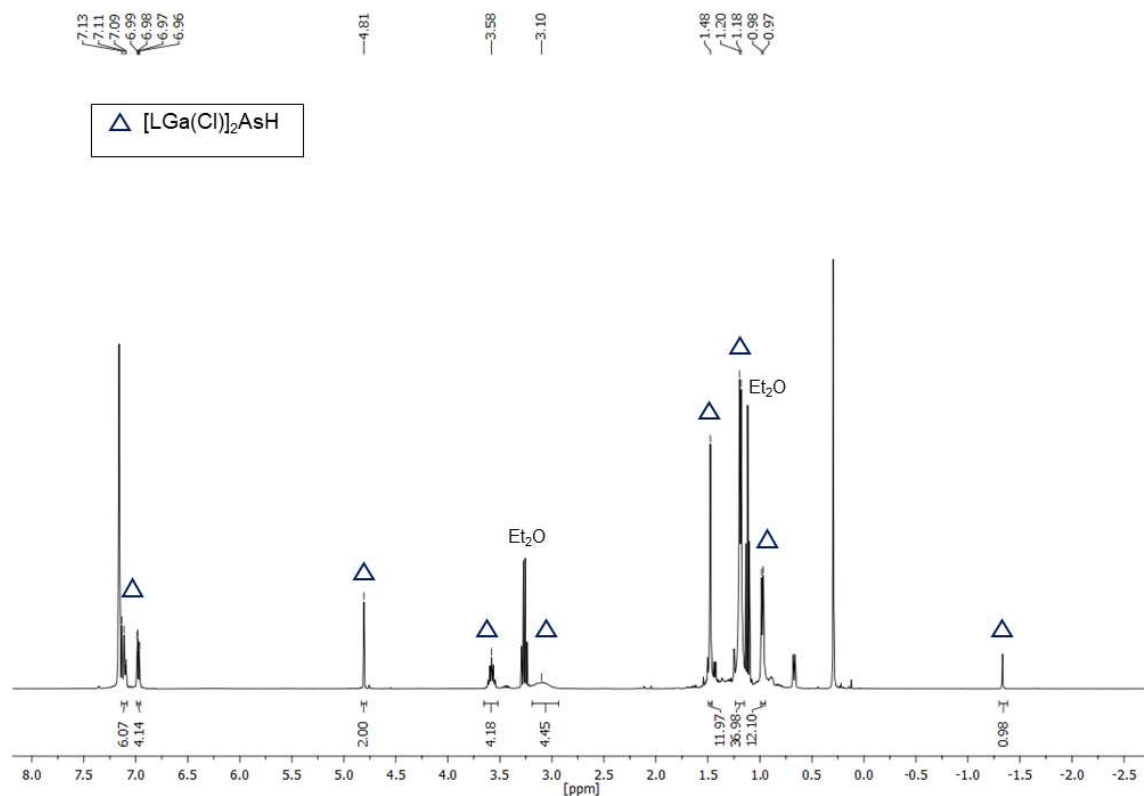

**Fig. S35.** <sup>1</sup>H NMR spectrum of the product from the stepwise reactions of LGa(Cl)AsGaL with [H(OEt<sub>2</sub>)<sub>2</sub>][BARF<sub>4</sub>] and IPrHCl in C<sub>6</sub>D<sub>6</sub>.

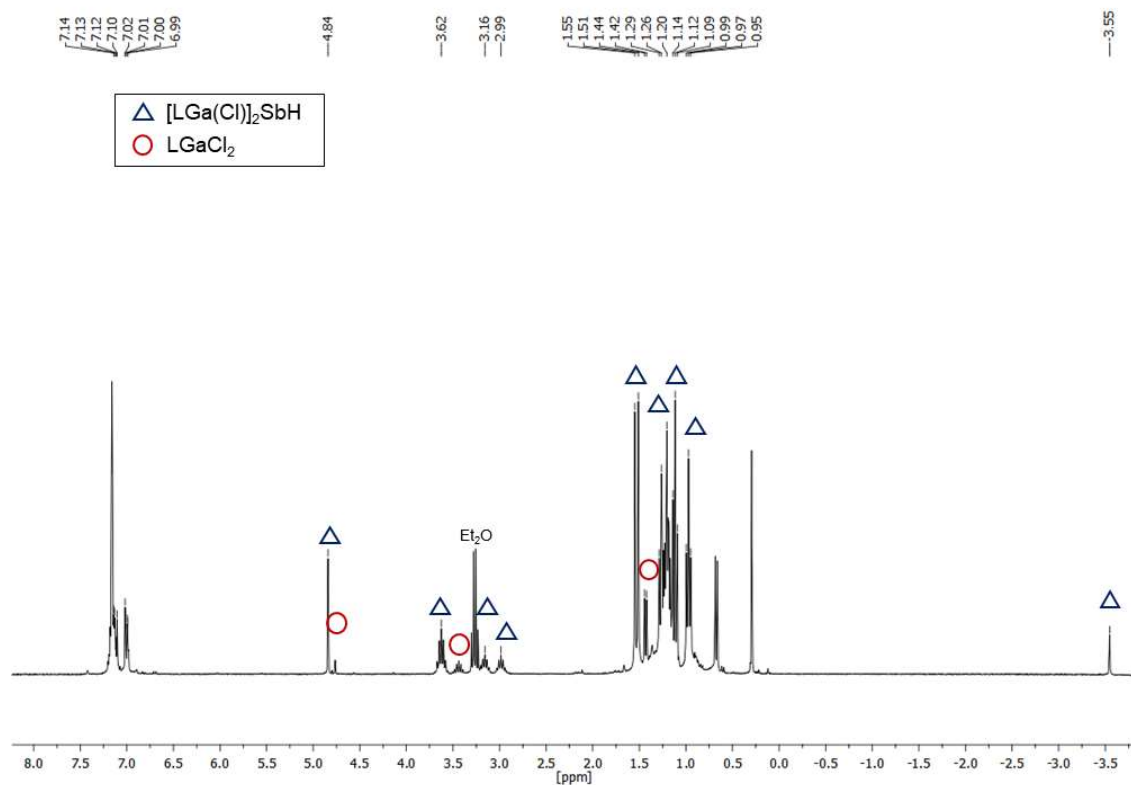

**Fig. S36.** <sup>1</sup>H NMR spectrum of the product from the stepwise reactions of LGa(Cl)SbGaL with [H(OEt<sub>2</sub>)<sub>2</sub>][BARF<sub>4</sub>] and IPrHCl in C<sub>6</sub>D<sub>6</sub>.

### C) Cyclic voltammetry

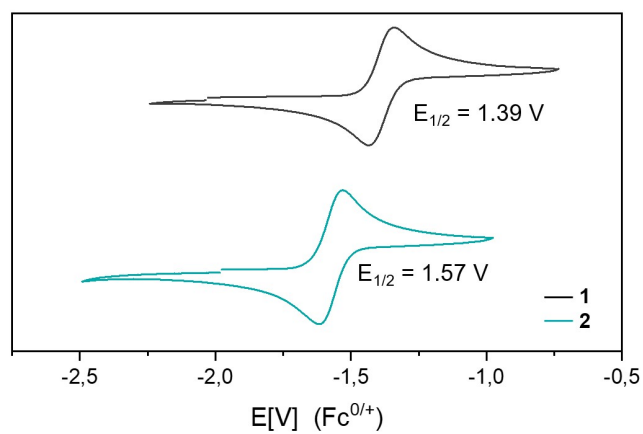

**Fig. S37.** Cyclic voltammograms of **1** and **2** in THF solution (1 mM) containing [n-Bu<sub>4</sub>N][B(3,5-(CF<sub>3</sub>)<sub>2</sub>-C<sub>6</sub>H<sub>3</sub>)<sub>4</sub>] (50 mM) as electrolyte at 100 mV s<sup>-1</sup> scan rate.

## D) Crystallographic Part

The crystals were mounted on nylon loops in inert oil. Data of **1** (jk\_332\_sq), **2** (jk\_186), **5** (jk\_460) and **9** (jk\_347) were collected on a Bruker AXS D8 Kappa diffractometer with APEX2 detector (mono-chromated Mo $\kappa\alpha$  radiation,  $\lambda = 0.71073$  Å) and data of **6** (jk\_489), **7** (jk\_577), **8** (jk\_573) and **10** (jk\_312) were collected on a Bruker AXS D8 Venture diffractometer with Photon II detector (mono-chromated Cu $\kappa\alpha$  radiation,  $\lambda = 1.54178$  Å, micro-focus source) at 100(2) K and 120 K (**7**). The structures were solved by Direct Methods (SHELXS-97)<sup>[6]</sup> and refined anisotropically by full-matrix least-squares on  $F^2$  (SHELXL-2014).<sup>[7,8]</sup> Absorption corrections were performed semi-empirically from equivalent reflections on basis of multi-scans (Bruker AXS APEX2/3). Hydrogen atoms were refined using a riding model or rigid methyl groups. In **1** (jk\_332\_sq) the i-Pr groups of the cation are disordered over two positions. The corresponding bond lengths were restrained to be equal (SADI). RIGU restraints were applied to the anisotropic displacement parameters of the disordered atoms. For the central C atoms additional SIMU restraints were used. The structure contains highly disordered molecules of benzene and THF. The final refinement was done with a solvent free dataset from a PLATON/SQUEEZE run.<sup>[9]</sup> Missing atoms were included in the sum formula for completeness. In **2** (jk\_186) an i-Pr group and a benzene molecule are disordered. The corresponding bond lengths and angles of the i-Pr groups were restrained to be equal (SADI) and its atoms' anisotropic displacement parameters were restrained with RIGU. The bond lengths of all benzene molecules were restrained to be equal to 1.39 Å (DFIX). The As-H atom of **5** (jk\_460) was identified in a difference Fourier map calculated only from the low angle data. The orientation found was realistic but the distance of 1.27 Å was rather short thus the bond length restrained to be equal to 1.52 Å (DFIX). All other parameters were refined freely. To exclude a misinterpretation of Fourier truncation effects the existence of this H atom was confirmed by <sup>1</sup>H-NMR spectroscopy. Despite large detector distance and small scan width per frame the integration was hampered by overlapping reflections. The worst runs were discarded leading to a reduced redundancy and a completeness of only 94% at high angles. The Sb-H atom of **6** (jk\_498) was refined freely with its bond length restrained to be equal to 1.7 Å (DFIX) and its displacement parameter constrained to 1.2 times the equivalent  $U_{ij}$  of the Sb atom. Since the original residual density peak was found (at realistic orientation) in the range of the fourier truncation peaks the existence of the H was additionally confirmed by H-NMR spectroscopic studies. I and Cl atoms in **7** (jk\_577) are disordered. The Ga–Cl and Ga–I bond length of both components were restrained to be equal (SADI). Due to the proximity of the alternate positions the displacement parameters were constrained to be equal (EADP). A di-isopropyl phenyl ligand is disordered over two positions. All its corresponding bond length and angle were restrained to be equal (SADI). RIGU and SIMU restraints were applied to the anisotropic displacement parameters of these atoms. Attempts to refine the approx 4e- peak near As1 as alternate orientation of the AsMe unit failed. A suitable peak for the methyl group could be found but refining it did not yield reasonable results. Cl and I atoms in **8** (jk\_573) are disordered. The bond lengths of both orientations were restrained to be equal (SADI) and the neighbouring atoms were refined with common anisotropic displacement parameters (EADP). The highest residual density peak approx. 0.8 Å near Sb1 is likely a result of Fourier truncation effects. Refining it as second orientation of Sb1 does reduce the R-values, but no suitable electron density peak for the methyl group can be found, thus this model was discarded.

CCDC-2034837 (**1**), -2034838 (**2**), -2034839 (**5**), -2034840 (**6**), -2043843 (**7**), -2042636 (**8**), -2034841 (**9**) and -2034842 (**10**) contain the supplementary crystallographic data for this paper. These data can be obtained free of charge from The Cambridge Crystallographic Data Centre via [www.ccdc.cam.ac.uk/data\\_request/cif](http://www.ccdc.cam.ac.uk/data_request/cif)

**Table S1.** Crystallographic details of **1**, **2**, **5** and **6**

|                                                                      | <b>1</b>                                                                                         | <b>2</b>                                                                           | <b>5</b>                                                                         | <b>6</b>                                                                          |
|----------------------------------------------------------------------|--------------------------------------------------------------------------------------------------|------------------------------------------------------------------------------------|----------------------------------------------------------------------------------|-----------------------------------------------------------------------------------|
| Empirical formula                                                    | C <sub>89</sub> H <sub>131</sub> AsCl <sub>2</sub> Ga <sub>2</sub> N <sub>6</sub> O <sub>2</sub> | C <sub>96</sub> H <sub>130</sub> Cl <sub>2</sub> Ga <sub>2</sub> N <sub>6</sub> Sb | C <sub>61</sub> H <sub>90</sub> AsCl <sub>2</sub> Ga <sub>2</sub> N <sub>4</sub> | C <sub>61</sub> H <sub>90</sub> Cl <sub>2</sub> Ga <sub>2</sub> N <sub>4</sub> Sb |
| <i>M</i> [g mol <sup>-1</sup> ]                                      | 1602.25                                                                                          | 1700.14                                                                            | 1164.62                                                                          | 1211.45                                                                           |
| Crystal size [mm]                                                    | 0.395 × 0.251 ×<br>0.115                                                                         | 0.371 × 0.137 ×<br>0.130                                                           | 0.310 × 0.282 ×<br>0.205                                                         | 0.147 × 0.139 ×<br>0.068                                                          |
| <i>T</i> [K]                                                         | 100(2)                                                                                           | 100(2)                                                                             | 100(2)                                                                           | 100(2)                                                                            |
| Crystal system                                                       | triclinic                                                                                        | triclinic                                                                          | monoclinic                                                                       | monoclinic                                                                        |
| Space group                                                          | <i>P</i> $\bar{1}$                                                                               | <i>P</i> $\bar{1}$                                                                 | <i>P</i> 2 <sub>1</sub> / <i>n</i>                                               | <i>P</i> 2 <sub>1</sub> / <i>n</i>                                                |
| <i>a</i> [Å]                                                         | 13.1432(14)                                                                                      | 12.9336(10)                                                                        | 12.040(3)                                                                        | 12.2314(5)                                                                        |
| <i>b</i> [Å]                                                         | 18.927(2)                                                                                        | 18.4527(16)                                                                        | 41.955(9)                                                                        | 41.5482(15)                                                                       |
| <i>c</i> [Å]                                                         | 19.015(2)                                                                                        | 19.8000(16)                                                                        | 13.217(3)                                                                        | 13.1137(5)                                                                        |
| $\alpha$ [°]                                                         | 100.016(6)                                                                                       | 93.287(5)                                                                          | 90                                                                               | 90                                                                                |
| $\beta$ [°]                                                          | 101.582(6)                                                                                       | 91.716(4)                                                                          | 112.218(11)                                                                      | 111.6273(17)                                                                      |
| $\gamma$ [°]                                                         | 104.695(6)                                                                                       | 102.306(4)                                                                         | 90                                                                               | 90                                                                                |
| <i>V</i> [Å <sup>3</sup> ]                                           | 4354.5(8)                                                                                        | 4605.0(7)                                                                          | 6181(2)                                                                          | 6195.1(4)                                                                         |
| <i>Z</i>                                                             | 2                                                                                                | 2                                                                                  | 4                                                                                | 4                                                                                 |
| <i>D</i> <sub>calcd</sub> [g cm <sup>-3</sup> ]                      | 1.222                                                                                            | 1.226                                                                              | 1.252                                                                            | 1.299                                                                             |
| $\mu$ ( <i>K</i> <sub><math>\alpha</math></sub> [mm <sup>-1</sup> ]) | 1.105 (Mo)                                                                                       | 0.976 (Mo)                                                                         | 1.528 (Mo)                                                                       | 5.527 (Cu)                                                                        |
| Transmissions                                                        | 0.75/0.66                                                                                        | 0.75/0.59                                                                          | 0.75/0.63                                                                        | 0.75/0.61                                                                         |
| <i>F</i> (000)                                                       | 1704                                                                                             | 1790                                                                               | 2452                                                                             | 2524                                                                              |
| Index ranges                                                         | -18 ≤ <i>h</i> ≤ 16<br>-27 ≤ <i>k</i> ≤ 26<br>-27 ≤ <i>l</i> ≤ 27                                | -20 ≤ <i>h</i> ≤ 13<br>-26 ≤ <i>k</i> ≤ 28<br>-30 ≤ <i>l</i> ≤ 25                  | -15 ≤ <i>h</i> ≤ 18<br>-64 ≤ <i>k</i> ≤ 64<br>-20 ≤ <i>l</i> ≤ 16                | -15 ≤ <i>h</i> ≤ 15<br>-53 ≤ <i>k</i> ≤ 52<br>-16 ≤ <i>l</i> ≤ 16                 |
| $\theta$ <sub>max</sub> [°]                                          | 30.751                                                                                           | 33.383                                                                             | 33.628                                                                           | 80.448                                                                            |
| Reflections collected                                                | 150267                                                                                           | 101351                                                                             | 84728                                                                            | 273138                                                                            |
| Independent reflections                                              | 26307                                                                                            | 32463                                                                              | 23017                                                                            | 13549                                                                             |
| <i>R</i> <sub>int</sub>                                              | 0.0350                                                                                           | 0.0420                                                                             | 0.0265                                                                           | 0.0595                                                                            |
| Refined parameters                                                   | 861                                                                                              | 1066                                                                               | 656                                                                              | 655                                                                               |
| <i>R</i> <sub>1</sub> [ <i>I</i> > 2 $\sigma$ ( <i>I</i> )]          | 0.0432                                                                                           | 0.0375                                                                             | 0.0423                                                                           | 0.0339                                                                            |
| <i>wR</i> <sub>2</sub> [all data]                                    | 0.1278                                                                                           | 0.0929                                                                             | 0.1052                                                                           | 0.0887                                                                            |
| GooF                                                                 | 1.037                                                                                            | 1.009                                                                              | 1.088                                                                            | 1.031                                                                             |
| $\Delta\rho$ <sub>final</sub> (max/min) [e·Å <sup>-3</sup> ]         | 1.201/-0.520                                                                                     | 1.661/-1.080                                                                       | 1.288/-0.992                                                                     | 0.970/-1.386                                                                      |

**Table S2.** Crystallographic details of **7**, **8**, **9** and **10**.

|                                                                      | <b>7</b>                                                            | <b>8</b>                                                             | <b>9</b>                                                                         | <b>10</b>                                                                         |
|----------------------------------------------------------------------|---------------------------------------------------------------------|----------------------------------------------------------------------|----------------------------------------------------------------------------------|-----------------------------------------------------------------------------------|
| Empirical formula                                                    | C <sub>59</sub> H <sub>85</sub> AsClGa <sub>2</sub> IN <sub>4</sub> | C <sub>59</sub> H <sub>85</sub> ClGa <sub>2</sub> IN <sub>4</sub> Sb | C <sub>59</sub> H <sub>85</sub> AsCl <sub>2</sub> Ga <sub>2</sub> N <sub>4</sub> | C <sub>59</sub> H <sub>85</sub> Cl <sub>2</sub> Ga <sub>2</sub> N <sub>4</sub> Sb |
| <i>M</i> [g mol <sup>-1</sup> ]                                      | 1227.02                                                             | 1273.84                                                              | 1135.56                                                                          | 1182.40                                                                           |
| Crystal size [mm]                                                    | 0.222 × 0.205 ×<br>0.081                                            | 0.450 × 0.203 ×<br>0.064                                             | 0.120 × 0.090 ×<br>0.050                                                         | 0.281 × 0.157 ×<br>0.133                                                          |
| <i>T</i> [K]                                                         | 100(2)                                                              | 120(2)                                                               | 100(2)                                                                           | 100(2)                                                                            |
| Crystal system                                                       | triclinic                                                           | monoclinic                                                           | triclinic                                                                        | triclinic                                                                         |
| Space group                                                          | <i>P</i> $\bar{1}$                                                  | <i>P</i> 2 <sub>1</sub> / <i>n</i>                                   | <i>P</i> $\bar{1}$                                                               | <i>P</i> $\bar{1}$                                                                |
| <i>a</i> [Å]                                                         | 12.0283(4)                                                          | 13.143(3)                                                            | 11.8191(11)                                                                      | 12.0390(17)                                                                       |
| <i>b</i> [Å]                                                         | 13.4279(4)                                                          | 20.082(5)                                                            | 13.5581(12)                                                                      | 13.6260(19)                                                                       |
| <i>c</i> [Å]                                                         | 20.1073(6)                                                          | 22.477(5)                                                            | 19.9868(18)                                                                      | 19.833(3)                                                                         |
| $\alpha$ [°]                                                         | 80.1899(17)                                                         | 90                                                                   | 79.651(4)                                                                        | 79.981(4)                                                                         |
| $\beta$ [°]                                                          | 85.0967(18)                                                         | 101.298(7)                                                           | 84.731(5)                                                                        | 84.097(4)                                                                         |
| $\gamma$ [°]                                                         | 65.8065(17)                                                         | 90                                                                   | 66.276(4)                                                                        | 66.850(4)                                                                         |
| <i>V</i> [Å <sup>3</sup> ]                                           | 2918.62(16)                                                         | 5818(2)                                                              | 2883.7(5)                                                                        | 2943.8(7)                                                                         |
| <i>Z</i>                                                             | 2                                                                   | 4                                                                    | 2                                                                                | 2                                                                                 |
| <i>D</i> <sub>calcd</sub> [g cm <sup>-3</sup> ]                      | 1.396                                                               | 1.454                                                                | 1.308                                                                            | 1.334                                                                             |
| $\mu$ ( <i>K</i> <sub><math>\alpha</math></sub> [mm <sup>-1</sup> ]) | 6.624                                                               | 1.997                                                                | 1.636 (Mo)                                                                       | 5.803 (Cu)                                                                        |
| Transmissions                                                        | 0.75/0.38                                                           | 0.75/0.50                                                            | 0.75/0.68                                                                        | 0.75/0.62                                                                         |
| <i>F</i> (000)                                                       | 1264                                                                | 2600                                                                 | 1192                                                                             | 1228                                                                              |
| Index ranges                                                         | -15 ≤ <i>h</i> ≤ 15<br>-17 ≤ <i>k</i> ≤ 17<br>-23 ≤ <i>l</i> ≤ 25   | -18 ≤ <i>h</i> ≤ 18<br>-28 ≤ <i>k</i> ≤ 28<br>-32 ≤ <i>l</i> ≤ 32    | -16 ≤ <i>h</i> ≤ 16<br>-19 ≤ <i>k</i> ≤ 19<br>-28 ≤ <i>l</i> ≤ 28                | -15 ≤ <i>h</i> ≤ 15<br>-17 ≤ <i>k</i> ≤ 17<br>-25 ≤ <i>l</i> ≤ 25                 |
| $\theta$ <sub>max</sub> [°]                                          | 81.960                                                              | 30.531                                                               | 30.781                                                                           | 81.146                                                                            |
| Reflections collected                                                | 143658                                                              | 253879                                                               | 146102                                                                           | 236084                                                                            |
| Independent reflections                                              | 12743                                                               | 17756                                                                | 17914                                                                            | 12822                                                                             |
| <i>R</i> <sub>int</sub>                                              | 0.0717                                                              | 0.0556                                                               | 0.0887                                                                           | 0.0619                                                                            |
| Refined parameters                                                   | 755                                                                 | 641                                                                  | 634                                                                              | 634                                                                               |
| <i>R</i> <sub>1</sub> [ <i>I</i> > 2 $\sigma$ ( <i>I</i> )]          | 0.0550                                                              | 0.0329                                                               | 0.0383                                                                           | 0.0599                                                                            |
| <i>wR</i> <sub>2</sub> [all data]                                    | 0.1596                                                              | 0.0771                                                               | 0.0804                                                                           | 0.1392                                                                            |
| GooF                                                                 | 1.079                                                               | 1.123                                                                | 1.015                                                                            | 1.038                                                                             |
| $\Delta\rho$ <sub>final</sub> (max/min) [e·Å <sup>-3</sup> ]         | 3.299/-2.042                                                        | 4.605/-1.911                                                         | 1.541/-1.002                                                                     | 6.251/-4.221                                                                      |

**Table S3.** Selected bond lengths [Å] and angles [°] of pnictanides [LGa(Cl)]<sub>2</sub>E[IPrH] (E = As **1**, Sb **2**), pnictogen-centered radicals [LGa(Cl)]<sub>2</sub>E• (E = As **I**, Sb **II**) and gallapnictenes LGaEGa(Cl)L (E = As **III**, Sb **IV**).<sup>[5]</sup>

|           | <b>1</b>    | <b>2</b>   | <b>I</b>   | <b>II</b> | <b>III</b>  | <b>IV</b>  |
|-----------|-------------|------------|------------|-----------|-------------|------------|
| Ga1-E     | 2.3171(4)   | 2.5169(3)  | 2.3983(11) | 2.5899(4) | 2.2628(5);  | 2.4629(2)  |
| Ga2-E     | 2.3197(4)   | 2.5186(3)  | 2.4085(14) | 2.5909(3) | 2.3503(4)   | 2.5528(2)  |
| Ga1-Cl1   | 2.2943(6)   | 2.2611(5)  | 2.1967(10) | 2.1623(9) | -           | -          |
| Ga2-Cl2   | 2.2548(7)   | 2.3012(5)  | 2.2069(10) | 2.2028(7) | 2.2783(9)   | 2.2409(5)  |
| Ga1-E-Ga2 | 107.377(15) | 104.534(9) | 109.43(6)  | 104.89(1) | 111.419(19) | 113.184(7) |

**Table S4.** Central structural bond lengths [Å] and angles [°] of **1**, **2**, **5** and **6**.

|           | <b>1</b> (E = As) | <b>2</b> (E = Sb) | <b>5</b> (E = As) | <b>6</b> (E = Sb) |
|-----------|-------------------|-------------------|-------------------|-------------------|
| Ga1-E     | 2.3171(4)         | 2.5169(3)         | 2.4156(5)         | 2.5669(3)         |
| Ga2-E     | 2.3197(4)         | 2.5186(3)         | 2.4000(6)         | 2.5803(3)         |
| Ga1-Cl1   | 2.2943(6)         | 2.2611(5)         | 2.2320(6)         | 2.2161(6)         |
| Ga2-Cl2   | 2.2548(7)         | 2.3012(5)         | 2.2104(6)         | 2.2012(6)         |
| Ga1-E-Ga2 | 107.377(15)       | 104.534(9)        | 110.566(13)       | 107.412(10)       |

**Table S5.** Central structural bond lengths [Å] and angles [°] of **7–10**.

|           | <b>7</b> (E = As, X = I) | <b>8</b> (E = Sb X = I,) | <b>9</b> (E = As, X = Cl) | <b>10</b> (E = Sb, X = Cl) |
|-----------|--------------------------|--------------------------|---------------------------|----------------------------|
| E-C       | 1.939(6)                 | 2.164(3)                 | 1.990(2)                  | 2.129(7)                   |
| Ga1-E     | 2.4232(6)                | 2.6118(6)                | 2.4044(4)                 | 2.5837(7)                  |
| Ga2-E     | 2.3946(6)                | 2.6132(5)                | 2.4134(4)                 | 2.6045(6)                  |
| Ga1-Cl1   | 2.193(5),<br>2.166(6)    | 2.228(8),<br>2.2300(14)  | 2.2045(6)                 | 2.2084(12)                 |
| Ga2-X2    | 2.5169(7),<br>2.5197(19) | 2.5973(6),<br>2.495(5)   | 2.2003(6)                 | 2.2103(12)                 |
| Ga1-E-Ga2 | 110.14(2)                | 111.076(12)              | 108.431(12)               | 106.652(19)                |

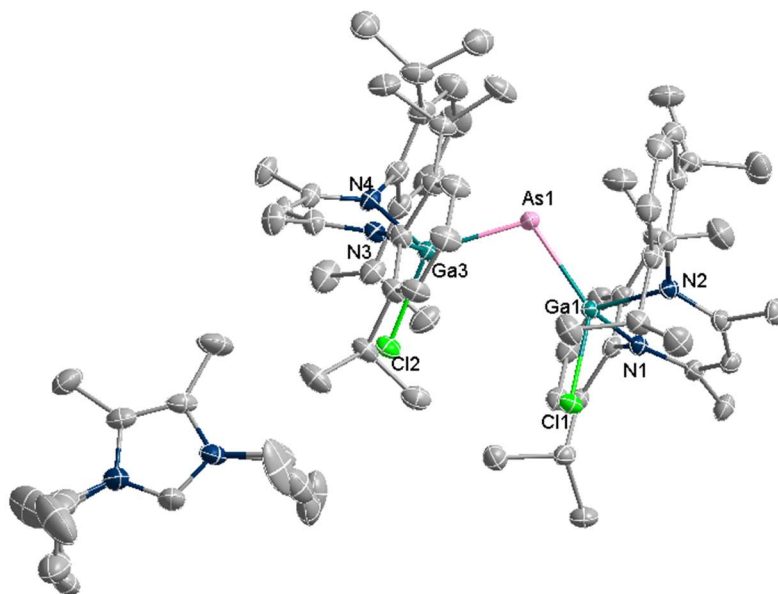

**Fig. S38.** Solid state structure of **1**. Hydrogen atoms and minor component of the disorder are omitted for clarity. Displacement ellipsoids drawn at 50% probability levels.

**Table S6:** Bond lengths [Å] for **1** (jk\_332m).

|             |            |             |          |               |           |
|-------------|------------|-------------|----------|---------------|-----------|
| As(1)-Ga(3) | 2.3171(4)  | C(9)-C(10)  | 1.378(4) | C(41)-C(42)   | 1.533(4)  |
| As(1)-Ga(1) | 2.3197(4)  | C(10)-C(11) | 1.397(3) | C(44)-C(45)   | 1.529(4)  |
| Ga(1)-N(2)  | 2.0139(18) | C(11)-C(15) | 1.521(3) | C(44)-C(46)   | 1.532(4)  |
| Ga(1)-N(1)  | 2.0166(18) | C(12)-C(14) | 1.532(3) | C(47)-C(52)   | 1.403(4)  |
| Ga(1)-Cl(1) | 2.2943(6)  | C(12)-C(13) | 1.538(3) | C(47)-C(48)   | 1.405(3)  |
| Ga(3)-N(4)  | 2.0063(18) | C(15)-C(17) | 1.521(4) | C(48)-C(49)   | 1.390(4)  |
| Ga(3)-N(3)  | 2.0093(19) | C(15)-C(16) | 1.552(4) | C(48)-C(53)   | 1.519(4)  |
| Ga(3)-Cl(2) | 2.2548(7)  | C(18)-C(19) | 1.402(3) | C(49)-C(50)   | 1.387(5)  |
| N(1)-C(1)   | 1.336(3)   | C(18)-C(23) | 1.410(3) | C(50)-C(51)   | 1.384(5)  |
| N(1)-C(6)   | 1.445(3)   | C(19)-C(20) | 1.403(3) | C(51)-C(52)   | 1.388(4)  |
| N(2)-C(3)   | 1.328(3)   | C(19)-C(24) | 1.510(4) | C(52)-C(56)   | 1.520(4)  |
| N(2)-C(18)  | 1.445(3)   | C(20)-C(21) | 1.376(4) | C(53)-C(54)   | 1.531(3)  |
| N(3)-C(30)  | 1.336(3)   | C(21)-C(22) | 1.378(4) | C(53)-C(55)   | 1.535(4)  |
| N(3)-C(35)  | 1.439(3)   | C(22)-C(23) | 1.393(3) | C(56)-C(58)   | 1.523(4)  |
| N(4)-C(32)  | 1.326(3)   | C(23)-C(27) | 1.520(4) | C(56)-C(57)   | 1.525(4)  |
| N(4)-C(47)  | 1.442(3)   | C(24)-C(26) | 1.525(4) | C(60)-C(61)   | 1.344(4)  |
| N(5)-C(59)  | 1.328(3)   | C(24)-C(25) | 1.536(4) | C(60)-C(68)   | 1.488(4)  |
| N(5)-C(60)  | 1.389(3)   | C(27)-C(29) | 1.521(4) | C(61)-C(69)   | 1.490(4)  |
| N(5)-C(62') | 1.476(13)  | C(27)-C(28) | 1.529(4) | C(62)-C(64)   | 1.509(8)  |
| N(5)-C(62)  | 1.481(8)   | C(30)-C(31) | 1.404(3) | C(62)-C(63)   | 1.515(10) |
| N(6)-C(59)  | 1.336(4)   | C(30)-C(33) | 1.510(3) | C(62')-C(63') | 1.513(13) |
| N(6)-C(61)  | 1.378(3)   | C(31)-C(32) | 1.400(3) | C(62')-C(64') | 1.516(13) |
| N(6)-C(65)  | 1.488(5)   | C(32)-C(34) | 1.515(3) | C(65)-C(66)   | 1.511(6)  |
| N(6)-C(65') | 1.489(15)  | C(35)-C(36) | 1.400(3) | C(65)-C(67)   | 1.518(8)  |
| C(1)-C(2)   | 1.406(3)   | C(35)-C(40) | 1.413(3) | C(65')-C(67') | 1.511(15) |



|            |          |             |          |               |           |
|------------|----------|-------------|----------|---------------|-----------|
| C(1)-C(4)  | 1.506(3) | C(36)-C(37) | 1.398(3) | C(65')-C(66') | 1.516(14) |
| C(2)-C(3)  | 1.402(3) | C(36)-C(41) | 1.525(3) | C11-C21       | 1.377(4)  |
| C(3)-C(5)  | 1.513(3) | C(37)-C(38) | 1.384(4) | C11-C61       | 1.382(5)  |
| C(6)-C(11) | 1.402(3) | C(38)-C(39) | 1.384(4) | C21-C31       | 1.382(4)  |
| C(6)-C(7)  | 1.410(3) | C(39)-C(40) | 1.387(3) | C31-C41       | 1.376(5)  |
| C(7)-C(8)  | 1.398(3) | C(40)-C(44) | 1.518(3) | C41-C51       | 1.380(4)  |
| C(7)-C(12) | 1.515(3) | C(41)-C(43) | 1.521(4) | C51-C61       | 1.375(4)  |
| C(8)-C(9)  | 1.384(4) |             |          |               |           |

**Table S7:** Bond angles [°] for **1** (jk\_332m).

|                   |             |                   |          |
|-------------------|-------------|-------------------|----------|
| Ga(3)-As(1)-Ga(1) | 107.377(15) | C(19)-C(24)-C(25) | 111.6(2) |
| N(2)-Ga(1)-N(1)   | 92.78(7)    | C(26)-C(24)-C(25) | 109.9(2) |
| N(2)-Ga(1)-Cl(1)  | 98.11(6)    | C(23)-C(27)-C(29) | 112.8(2) |
| N(1)-Ga(1)-Cl(1)  | 95.58(6)    | C(23)-C(27)-C(28) | 112.3(2) |
| N(2)-Ga(1)-As(1)  | 108.27(5)   | C(29)-C(27)-C(28) | 110.1(2) |
| N(1)-Ga(1)-As(1)  | 123.38(5)   | N(3)-C(30)-C(31)  | 123.9(2) |
| Cl(1)-Ga(1)-As(1) | 130.34(2)   | N(3)-C(30)-C(33)  | 120.6(2) |
| N(4)-Ga(3)-N(3)   | 91.42(8)    | C(31)-C(30)-C(33) | 115.5(2) |
| N(4)-Ga(3)-Cl(2)  | 99.86(6)    | C(32)-C(31)-C(30) | 126.9(2) |
| N(3)-Ga(3)-Cl(2)  | 97.59(6)    | N(4)-C(32)-C(31)  | 123.9(2) |
| N(4)-Ga(3)-As(1)  | 112.19(6)   | N(4)-C(32)-C(34)  | 120.1(2) |
| N(3)-Ga(3)-As(1)  | 122.03(5)   | C(31)-C(32)-C(34) | 116.0(2) |
| Cl(2)-Ga(3)-As(1) | 126.56(2)   | C(36)-C(35)-C(40) | 120.9(2) |
| C(1)-N(1)-C(6)    | 117.19(18)  | C(36)-C(35)-N(3)  | 120.7(2) |
| C(1)-N(1)-Ga(1)   | 120.73(15)  | C(40)-C(35)-N(3)  | 118.4(2) |
| C(6)-N(1)-Ga(1)   | 122.05(13)  | C(37)-C(36)-C(35) | 118.5(2) |
| C(3)-N(2)-C(18)   | 119.15(18)  | C(37)-C(36)-C(41) | 118.6(2) |
| C(3)-N(2)-Ga(1)   | 121.57(15)  | C(35)-C(36)-C(41) | 122.8(2) |
| C(18)-N(2)-Ga(1)  | 119.05(14)  | C(38)-C(37)-C(36) | 120.9(2) |
| C(30)-N(3)-C(35)  | 117.60(19)  | C(39)-C(38)-C(37) | 119.8(2) |
| C(30)-N(3)-Ga(3)  | 121.19(15)  | C(38)-C(39)-C(40) | 121.3(2) |
| C(35)-N(3)-Ga(3)  | 120.80(15)  | C(39)-C(40)-C(35) | 118.3(2) |
| C(32)-N(4)-C(47)  | 120.61(19)  | C(39)-C(40)-C(44) | 120.7(2) |
| C(32)-N(4)-Ga(3)  | 121.26(16)  | C(35)-C(40)-C(44) | 120.9(2) |
| C(47)-N(4)-Ga(3)  | 117.91(14)  | C(43)-C(41)-C(36) | 109.8(2) |
| C(59)-N(5)-C(60)  | 108.4(2)    | C(43)-C(41)-C(42) | 109.5(2) |
| C(59)-N(5)-C(62') | 126.9(10)   | C(36)-C(41)-C(42) | 113.1(2) |
| C(60)-N(5)-C(62') | 124.3(10)   | C(40)-C(44)-C(45) | 111.0(2) |
| C(59)-N(5)-C(62)  | 124.8(6)    | C(40)-C(44)-C(46) | 112.8(2) |
| C(60)-N(5)-C(62)  | 126.8(6)    | C(45)-C(44)-C(46) | 110.5(2) |
| C(59)-N(6)-C(61)  | 108.4(2)    | C(52)-C(47)-C(48) | 121.0(2) |
| C(59)-N(6)-C(65)  | 125.4(3)    | C(52)-C(47)-N(4)  | 118.8(2) |
| C(61)-N(6)-C(65)  | 126.2(3)    | C(48)-C(47)-N(4)  | 120.1(2) |

|                   |            |                      |           |
|-------------------|------------|----------------------|-----------|
| C(59)-N(6)-C(65') | 119.0(14)  | C(49)-C(48)-C(47)    | 118.3(3)  |
| C(61)-N(6)-C(65') | 124.8(11)  | C(49)-C(48)-C(53)    | 119.3(2)  |
| N(1)-C(1)-C(2)    | 124.1(2)   | C(47)-C(48)-C(53)    | 122.4(2)  |
| N(1)-C(1)-C(4)    | 120.0(2)   | C(50)-C(49)-C(48)    | 121.1(3)  |
| C(2)-C(1)-C(4)    | 115.9(2)   | C(51)-C(50)-C(49)    | 119.9(3)  |
| C(3)-C(2)-C(1)    | 128.1(2)   | C(50)-C(51)-C(52)    | 120.8(3)  |
| N(2)-C(3)-C(2)    | 123.7(2)   | C(51)-C(52)-C(47)    | 118.8(2)  |
| N(2)-C(3)-C(5)    | 119.8(2)   | C(51)-C(52)-C(56)    | 119.5(3)  |
| C(2)-C(3)-C(5)    | 116.4(2)   | C(47)-C(52)-C(56)    | 121.6(2)  |
| C(11)-C(6)-C(7)   | 120.5(2)   | C(48)-C(53)-C(54)    | 111.7(2)  |
| C(11)-C(6)-N(1)   | 118.58(19) | C(48)-C(53)-C(55)    | 110.1(2)  |
| C(7)-C(6)-N(1)    | 120.9(2)   | C(54)-C(53)-C(55)    | 109.7(2)  |
| C(8)-C(7)-C(6)    | 118.4(2)   | C(52)-C(56)-C(58)    | 112.5(3)  |
| C(8)-C(7)-C(12)   | 118.6(2)   | C(52)-C(56)-C(57)    | 110.6(2)  |
| C(6)-C(7)-C(12)   | 123.1(2)   | C(58)-C(56)-C(57)    | 110.7(2)  |
| C(9)-C(8)-C(7)    | 121.5(2)   | N(5)-C(59)-N(6)      | 108.7(2)  |
| C(10)-C(9)-C(8)   | 119.4(2)   | C(61)-C(60)-N(5)     | 107.0(2)  |
| C(9)-C(10)-C(11)  | 121.4(2)   | C(61)-C(60)-C(68)    | 130.8(3)  |
| C(10)-C(11)-C(6)  | 118.8(2)   | N(5)-C(60)-C(68)     | 122.2(3)  |
| C(10)-C(11)-C(15) | 119.2(2)   | C(60)-C(61)-N(6)     | 107.5(2)  |
| C(6)-C(11)-C(15)  | 122.1(2)   | C(60)-C(61)-C(69)    | 130.4(3)  |
| C(7)-C(12)-C(14)  | 110.83(19) | N(6)-C(61)-C(69)     | 122.2(3)  |
| C(7)-C(12)-C(13)  | 112.3(2)   | N(5)-C(62)-C(64)     | 114.7(9)  |
| C(14)-C(12)-C(13) | 109.3(2)   | N(5)-C(62)-C(63)     | 112.9(8)  |
| C(17)-C(15)-C(11) | 111.2(2)   | C(64)-C(62)-C(63)    | 112.6(7)  |
| C(17)-C(15)-C(16) | 109.9(2)   | N(5)-C(62')-C(63')   | 105.4(13) |
| C(11)-C(15)-C(16) | 110.4(2)   | N(5)-C(62')-C(64')   | 104.7(13) |
| C(19)-C(18)-C(23) | 121.0(2)   | C(63')-C(62')-C(64') | 111.9(15) |
| C(19)-C(18)-N(2)  | 120.6(2)   | N(6)-C(65)-C(66)     | 111.8(4)  |
| C(23)-C(18)-N(2)  | 118.3(2)   | N(6)-C(65)-C(67)     | 107.4(5)  |
| C(18)-C(19)-C(20) | 118.0(2)   | C(66)-C(65)-C(67)    | 111.9(5)  |
| C(18)-C(19)-C(24) | 123.1(2)   | N(6)-C(65')-C(67')   | 124(3)    |
| C(20)-C(19)-C(24) | 118.9(2)   | N(6)-C(65')-C(66')   | 100(2)    |
| C(21)-C(20)-C(19) | 121.5(2)   | C(67')-C(65')-C(66') | 105(3)    |
| C(20)-C(21)-C(22) | 119.7(2)   | C21-C11-C61          | 120.3(3)  |
| C(21)-C(22)-C(23) | 121.4(2)   | C11-C21-C31          | 119.7(3)  |
| C(22)-C(23)-C(18) | 118.3(2)   | C41-C31-C21          | 120.2(3)  |
| C(22)-C(23)-C(27) | 120.5(2)   | C31-C41-C51          | 119.8(3)  |
| C(18)-C(23)-C(27) | 121.2(2)   | C61-C51-C41          | 120.3(3)  |
| C(19)-C(24)-C(26) | 110.7(2)   | C51-C61-C11          | 119.7(3)  |

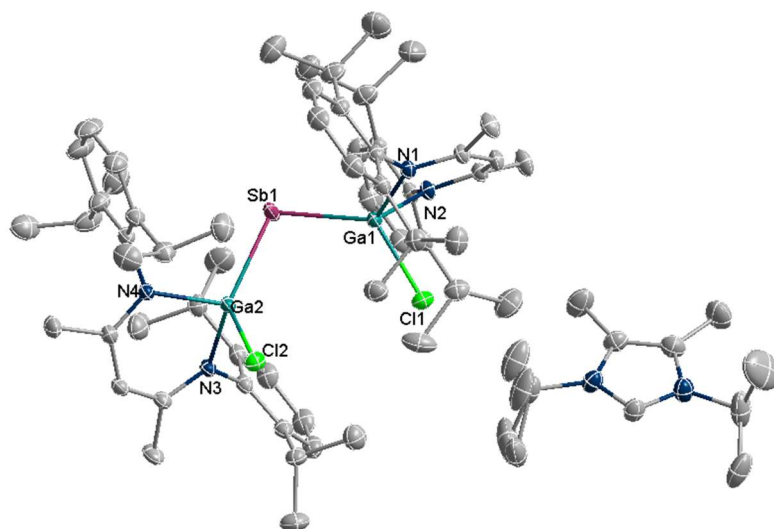

**Fig. S39.** Solid state structure of **2**. Hydrogen atoms and minor component of the disorder are omitted for clarity. Displacement ellipsoids drawn at 50% probability levels.

**Table S8:** Bond lengths [Å] for **2** (jk\_186m).

|             |            |             |          |              |           |
|-------------|------------|-------------|----------|--------------|-----------|
| Sb(1)-Ga(1) | 2.5169(3)  | C(19)-C(20) | 1.402(2) | C(61)-C(66)  | 1.492(3)  |
| Sb(1)-Ga(2) | 2.5186(3)  | C(19)-C(24) | 1.511(3) | C(62)-C(63)  | 1.500(4)  |
| Ga(1)-N(1)  | 2.0153(12) | C(20)-C(21) | 1.374(3) | C(62)-C(64)  | 1.518(4)  |
| Ga(1)-N(2)  | 2.0166(14) | C(21)-C(22) | 1.383(3) | C(67)-C(69)  | 1.466(9)  |
| Ga(1)-Cl(1) | 2.2611(5)  | C(22)-C(23) | 1.393(3) | C(67)-C(68') | 1.476(6)  |
| Ga(2)-N(4)  | 1.9985(14) | C(23)-C(27) | 1.521(3) | C(67)-C(69') | 1.516(6)  |
| Ga(2)-N(3)  | 2.0117(12) | C(24)-C(25) | 1.522(3) | C(67)-C(68)  | 1.564(8)  |
| Ga(2)-Cl(2) | 2.3012(5)  | C(24)-C(26) | 1.539(3) | C11-C21      | 1.374(5)  |
| N(1)-C(1)   | 1.326(2)   | C(27)-C(29) | 1.524(3) | C11-C61      | 1.375(5)  |
| N(1)-C(6)   | 1.447(2)   | C(27)-C(28) | 1.524(3) | C21-C31      | 1.366(4)  |
| N(2)-C(3)   | 1.329(2)   | C(30)-C(31) | 1.401(2) | C31-C41      | 1.353(4)  |
| N(2)-C(18)  | 1.440(2)   | C(30)-C(33) | 1.512(2) | C41-C51      | 1.346(4)  |
| N(3)-C(30)  | 1.330(2)   | C(31)-C(32) | 1.399(2) | C51-C61      | 1.358(5)  |
| N(3)-C(35)  | 1.446(2)   | C(32)-C(34) | 1.508(2) | C12-C22      | 1.351(13) |
| N(4)-C(32)  | 1.329(2)   | C(35)-C(36) | 1.408(3) | C12-C62      | 1.386(12) |
| N(4)-C(47)  | 1.446(2)   | C(35)-C(40) | 1.409(3) | C22-C32      | 1.375(11) |
| N(5)-C(59)  | 1.326(3)   | C(36)-C(37) | 1.397(2) | C32-C42      | 1.376(10) |
| N(5)-C(60)  | 1.387(3)   | C(36)-C(41) | 1.519(3) | C42-C52      | 1.381(10) |
| N(5)-C(62)  | 1.483(3)   | C(37)-C(38) | 1.383(3) | C52-C62      | 1.382(12) |
| N(6)-C(59)  | 1.326(2)   | C(38)-C(39) | 1.377(3) | C13-C23      | 1.349(6)  |
| N(6)-C(61)  | 1.381(3)   | C(39)-C(40) | 1.398(2) | C13-C63      | 1.366(6)  |
| N(6)-C(67)  | 1.484(3)   | C(40)-C(44) | 1.514(3) | C23-C33      | 1.325(5)  |
| C(1)-C(2)   | 1.404(2)   | C(41)-C(42) | 1.528(3) | C33-C43      | 1.336(5)  |
| C(1)-C(4)   | 1.511(2)   | C(41)-C(43) | 1.533(3) | C43-C53      | 1.369(6)  |
| C(2)-C(3)   | 1.401(2)   | C(44)-C(45) | 1.526(3) | C53-C63      | 1.360(6)  |
| C(3)-C(5)   | 1.511(2)   | C(44)-C(46) | 1.528(3) | C14-C64      | 1.366(4)  |

|             |          |             |          |           |           |
|-------------|----------|-------------|----------|-----------|-----------|
| C(6)-C(7)   | 1.404(3) | C(47)-C(52) | 1.396(3) | C14-C24   | 1.369(4)  |
| C(6)-C(11)  | 1.406(3) | C(47)-C(48) | 1.408(2) | C24-C34   | 1.376(4)  |
| C(7)-C(8)   | 1.402(2) | C(48)-C(49) | 1.398(3) | C34-C44   | 1.364(5)  |
| C(7)-C(12)  | 1.515(3) | C(48)-C(53) | 1.511(3) | C44-C54   | 1.346(5)  |
| C(8)-C(9)   | 1.379(3) | C(49)-C(50) | 1.373(3) | C54-C64   | 1.351(4)  |
| C(9)-C(10)  | 1.377(3) | C(50)-C(51) | 1.377(3) | C15-C35#1 | 1.356(5)  |
| C(10)-C(11) | 1.402(2) | C(51)-C(52) | 1.394(3) | C15-C25   | 1.373(5)  |
| C(11)-C(15) | 1.510(3) | C(52)-C(56) | 1.527(3) | C25-C35   | 1.376(5)  |
| C(12)-C(14) | 1.527(3) | C(53)-C(54) | 1.521(3) | C16-C26   | 1.361(11) |
| C(12)-C(13) | 1.540(3) | C(53)-C(55) | 1.531(3) | C16-C66   | 1.374(12) |
| C(15)-C(16) | 1.517(3) | C(56)-C(57) | 1.524(3) | C26-C36   | 1.376(13) |
| C(15)-C(17) | 1.519(3) | C(56)-C(58) | 1.527(3) | C36-C46   | 1.358(13) |
| C(18)-C(23) | 1.401(3) | C(60)-C(61) | 1.356(3) | C46-C56   | 1.352(14) |
| C(18)-C(19) | 1.406(2) | C(60)-C(65) | 1.484(3) | C56-C66   | 1.349(14) |

**Table S9:** Bond angles [°] for **2** (jk\_186m).

|                   |             |                   |            |
|-------------------|-------------|-------------------|------------|
| Ga(1)-Sb(1)-Ga(2) | 104.534(9)  | C(40)-C(35)-N(3)  | 118.49(15) |
| N(1)-Ga(1)-N(2)   | 92.64(5)    | C(37)-C(36)-C(35) | 118.16(18) |
| N(1)-Ga(1)-Cl(1)  | 97.50(4)    | C(37)-C(36)-C(41) | 119.17(17) |
| N(2)-Ga(1)-Cl(1)  | 98.25(4)    | C(35)-C(36)-C(41) | 122.65(15) |
| N(1)-Ga(1)-Sb(1)  | 120.92(4)   | C(38)-C(37)-C(36) | 121.28(19) |
| N(2)-Ga(1)-Sb(1)  | 112.97(4)   | C(39)-C(38)-C(37) | 119.73(17) |
| Cl(1)-Ga(1)-Sb(1) | 127.387(14) | C(38)-C(39)-C(40) | 121.60(19) |
| N(4)-Ga(2)-N(3)   | 92.52(5)    | C(39)-C(40)-C(35) | 117.93(18) |
| N(4)-Ga(2)-Cl(2)  | 99.47(4)    | C(39)-C(40)-C(44) | 120.07(17) |
| N(3)-Ga(2)-Cl(2)  | 96.77(4)    | C(35)-C(40)-C(44) | 121.92(15) |
| N(4)-Ga(2)-Sb(1)  | 109.26(4)   | C(36)-C(41)-C(42) | 109.72(16) |
| N(3)-Ga(2)-Sb(1)  | 123.53(4)   | C(36)-C(41)-C(43) | 113.15(14) |
| Cl(2)-Ga(2)-Sb(1) | 127.800(14) | C(42)-C(41)-C(43) | 109.57(17) |
| C(1)-N(1)-C(6)    | 117.86(12)  | C(40)-C(44)-C(45) | 112.89(17) |
| C(1)-N(1)-Ga(1)   | 120.19(10)  | C(40)-C(44)-C(46) | 110.29(16) |
| C(6)-N(1)-Ga(1)   | 121.64(10)  | C(45)-C(44)-C(46) | 110.94(18) |
| C(3)-N(2)-C(18)   | 120.22(14)  | C(52)-C(47)-C(48) | 121.11(16) |
| C(3)-N(2)-Ga(1)   | 120.72(11)  | C(52)-C(47)-N(4)  | 119.05(14) |
| C(18)-N(2)-Ga(1)  | 118.86(10)  | C(48)-C(47)-N(4)  | 119.85(16) |
| C(30)-N(3)-C(35)  | 117.38(13)  | C(49)-C(48)-C(47) | 117.76(18) |
| C(30)-N(3)-Ga(2)  | 120.01(11)  | C(49)-C(48)-C(53) | 119.29(15) |
| C(35)-N(3)-Ga(2)  | 122.36(10)  | C(47)-C(48)-C(53) | 122.96(15) |
| C(32)-N(4)-C(47)  | 118.11(14)  | C(50)-C(49)-C(48) | 121.63(17) |
| C(32)-N(4)-Ga(2)  | 120.99(11)  | C(49)-C(50)-C(51) | 119.78(18) |
| C(47)-N(4)-Ga(2)  | 120.86(10)  | C(50)-C(51)-C(52) | 121.2(2)   |
| C(59)-N(5)-C(60)  | 108.68(17)  | C(51)-C(52)-C(47) | 118.55(17) |
| C(59)-N(5)-C(62)  | 125.72(18)  | C(51)-C(52)-C(56) | 118.40(18) |

|                   |            |                     |            |
|-------------------|------------|---------------------|------------|
| C(60)-N(5)-C(62)  | 125.55(18) | C(47)-C(52)-C(56)   | 123.05(16) |
| C(59)-N(6)-C(61)  | 108.89(17) | C(48)-C(53)-C(54)   | 111.16(17) |
| C(59)-N(6)-C(67)  | 125.18(17) | C(48)-C(53)-C(55)   | 111.65(18) |
| C(61)-N(6)-C(67)  | 125.88(17) | C(54)-C(53)-C(55)   | 109.74(16) |
| N(1)-C(1)-C(2)    | 124.24(14) | C(57)-C(56)-C(58)   | 110.04(18) |
| N(1)-C(1)-C(4)    | 120.23(15) | C(57)-C(56)-C(52)   | 111.04(18) |
| C(2)-C(1)-C(4)    | 115.50(14) | C(58)-C(56)-C(52)   | 111.79(19) |
| C(3)-C(2)-C(1)    | 128.29(15) | N(6)-C(59)-N(5)     | 108.80(18) |
| N(2)-C(3)-C(2)    | 123.21(15) | C(61)-C(60)-N(5)    | 106.74(18) |
| N(2)-C(3)-C(5)    | 120.38(14) | C(61)-C(60)-C(65)   | 130.3(2)   |
| C(2)-C(3)-C(5)    | 116.39(14) | N(5)-C(60)-C(65)    | 123.0(2)   |
| C(7)-C(6)-C(11)   | 120.97(15) | C(60)-C(61)-N(6)    | 106.88(17) |
| C(7)-C(6)-N(1)    | 120.49(15) | C(60)-C(61)-C(66)   | 130.5(2)   |
| C(11)-C(6)-N(1)   | 118.54(16) | N(6)-C(61)-C(66)    | 122.55(19) |
| C(8)-C(7)-C(6)    | 118.10(17) | N(5)-C(62)-C(63)    | 111.0(2)   |
| C(8)-C(7)-C(12)   | 118.73(17) | N(5)-C(62)-C(64)    | 108.6(2)   |
| C(6)-C(7)-C(12)   | 123.14(15) | C(63)-C(62)-C(64)   | 112.2(2)   |
| C(9)-C(8)-C(7)    | 121.70(18) | C(69)-C(67)-N(6)    | 112.8(5)   |
| C(10)-C(9)-C(8)   | 119.37(17) | C(68')-C(67)-N(6)   | 109.4(3)   |
| C(9)-C(10)-C(11)  | 121.60(18) | C(68')-C(67)-C(69') | 115.3(4)   |
| C(10)-C(11)-C(6)  | 118.19(17) | N(6)-C(67)-C(69')   | 110.2(3)   |
| C(10)-C(11)-C(15) | 120.31(17) | C(69)-C(67)-C(68)   | 112.6(7)   |
| C(6)-C(11)-C(15)  | 121.47(15) | N(6)-C(67)-C(68)    | 108.1(4)   |
| C(7)-C(12)-C(14)  | 109.97(16) | C21-C11-C61         | 119.3(3)   |
| C(7)-C(12)-C(13)  | 112.69(15) | C31-C21-C11         | 119.9(3)   |
| C(14)-C(12)-C(13) | 109.95(17) | C41-C31-C21         | 120.0(3)   |
| C(11)-C(15)-C(16) | 111.57(18) | C51-C41-C31         | 120.4(3)   |
| C(11)-C(15)-C(17) | 113.01(18) | C41-C51-C61         | 120.9(3)   |
| C(16)-C(15)-C(17) | 110.32(19) | C51-C61-C11         | 119.6(3)   |
| C(23)-C(18)-C(19) | 121.06(15) | C22-C12-C62         | 122.8(10)  |
| C(23)-C(18)-N(2)  | 118.25(14) | C12-C22-C32         | 117.8(11)  |
| C(19)-C(18)-N(2)  | 120.59(16) | C22-C32-C42         | 121.5(10)  |
| C(20)-C(19)-C(18) | 117.96(18) | C32-C42-C52         | 119.9(10)  |
| C(20)-C(19)-C(24) | 119.11(16) | C42-C52-C62         | 119.2(11)  |
| C(18)-C(19)-C(24) | 122.91(15) | C52-C62-C12         | 118.8(10)  |
| C(21)-C(20)-C(19) | 121.41(17) | C23-C13-C63         | 120.8(4)   |
| C(20)-C(21)-C(22) | 119.92(17) | C33-C23-C13         | 119.9(4)   |
| C(21)-C(22)-C(23) | 121.0(2)   | C23-C33-C43         | 121.2(4)   |
| C(22)-C(23)-C(18) | 118.64(17) | C33-C43-C53         | 119.9(4)   |
| C(22)-C(23)-C(27) | 120.28(18) | C63-C53-C43         | 119.8(4)   |
| C(18)-C(23)-C(27) | 121.06(15) | C53-C63-C13         | 118.5(4)   |
| C(19)-C(24)-C(25) | 110.41(18) | C64-C14-C24         | 119.7(3)   |
| C(19)-C(24)-C(26) | 112.16(18) | C14-C24-C34         | 119.3(3)   |

|                   |            |               |           |
|-------------------|------------|---------------|-----------|
| C(25)-C(24)-C(26) | 110.18(18) | C44-C34-C24   | 119.6(3)  |
| C(23)-C(27)-C(29) | 110.62(17) | C54-C44-C34   | 120.9(3)  |
| C(23)-C(27)-C(28) | 113.62(17) | C44-C54-C64   | 119.8(3)  |
| C(29)-C(27)-C(28) | 109.89(18) | C54-C64-C14   | 120.8(3)  |
| N(3)-C(30)-C(31)  | 124.01(14) | C35#1-C15-C25 | 120.7(3)  |
| N(3)-C(30)-C(33)  | 120.44(15) | C15-C25-C35   | 120.1(3)  |
| C(31)-C(30)-C(33) | 115.52(15) | C15#1-C35-C25 | 119.3(3)  |
| C(32)-C(31)-C(30) | 128.00(15) | C26-C16-C66   | 120.0(12) |
| N(4)-C(32)-C(31)  | 123.01(15) | C16-C26-C36   | 116.0(12) |
| N(4)-C(32)-C(34)  | 119.75(14) | C46-C36-C26   | 124.6(12) |
| C(31)-C(32)-C(34) | 117.22(14) | C56-C46-C36   | 117.8(12) |
| C(36)-C(35)-C(40) | 121.04(16) | C66-C56-C46   | 119.6(13) |
| C(36)-C(35)-N(3)  | 120.40(16) | C56-C66-C16   | 122.0(13) |

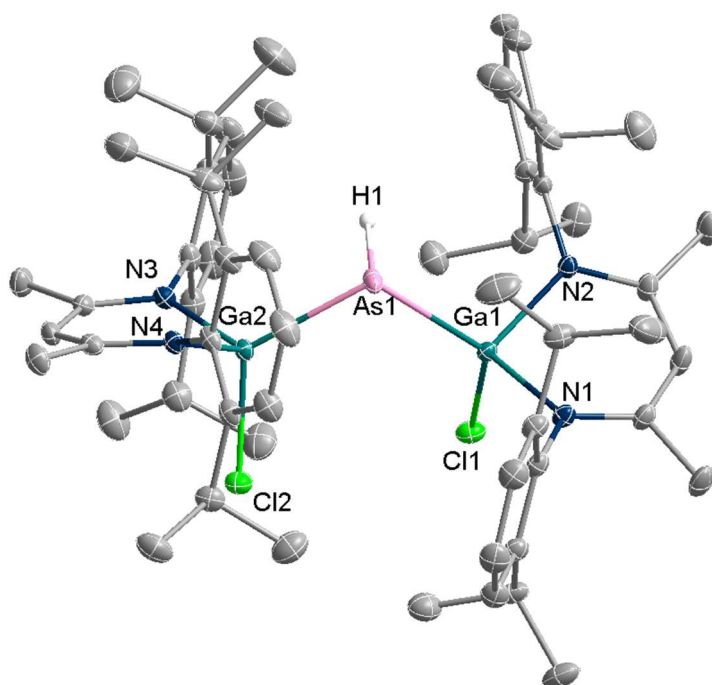

**Fig. S40.** Solid state structure of **5**. Hydrogen atoms except for As-H are omitted for clarity. H1 is displayed as sphere of arbitrary radius. Displacement ellipsoids drawn at 50% probability levels.

**Table S10:** Bond lengths [Å] for **5** (jk\_460m).

|             |            |             |          |             |          |
|-------------|------------|-------------|----------|-------------|----------|
| As(1)-Ga(2) | 2.4000(6)  | C(9)-C(10)  | 1.385(3) | C(36)-C(37) | 1.406(3) |
| As(1)-Ga(1) | 2.4156(5)  | C(10)-C(11) | 1.400(3) | C(36)-C(41) | 1.521(3) |
| Ga(1)-N(1)  | 1.9505(16) | C(11)-C(15) | 1.524(3) | C(37)-C(38) | 1.381(4) |
| Ga(1)-N(2)  | 1.9648(16) | C(12)-C(14) | 1.527(3) | C(38)-C(39) | 1.389(4) |
| Ga(1)-Cl(1) | 2.2320(6)  | C(12)-C(13) | 1.534(3) | C(39)-C(40) | 1.405(3) |
| Ga(2)-N(3)  | 1.9557(17) | C(15)-C(16) | 1.531(4) | C(40)-C(44) | 1.528(3) |
| Ga(2)-N(4)  | 1.9836(15) | C(15)-C(17) | 1.537(3) | C(41)-C(43) | 1.534(3) |
| Ga(2)-Cl(2) | 2.2104(6)  | C(18)-C(19) | 1.406(3) | C(41)-C(42) | 1.540(3) |
| N(1)-C(1)   | 1.339(2)   | C(18)-C(23) | 1.421(3) | C(44)-C(46) | 1.523(3) |
| N(1)-C(6)   | 1.449(2)   | C(19)-C(20) | 1.394(3) | C(44)-C(45) | 1.532(4) |
| N(2)-C(3)   | 1.332(2)   | C(19)-C(24) | 1.526(3) | C(47)-C(48) | 1.404(3) |
| N(2)-C(18)  | 1.446(2)   | C(20)-C(21) | 1.393(3) | C(47)-C(52) | 1.418(3) |
| N(3)-C(30)  | 1.337(2)   | C(21)-C(22) | 1.383(3) | C(48)-C(49) | 1.401(3) |
| N(3)-C(35)  | 1.456(2)   | C(22)-C(23) | 1.396(3) | C(48)-C(53) | 1.523(3) |
| N(4)-C(32)  | 1.327(2)   | C(23)-C(27) | 1.522(3) | C(49)-C(50) | 1.397(3) |
| N(4)-C(47)  | 1.449(2)   | C(24)-C(26) | 1.536(3) | C(50)-C(51) | 1.384(4) |
| C(1)-C(2)   | 1.402(3)   | C(24)-C(25) | 1.548(3) | C(51)-C(52) | 1.400(3) |
| C(1)-C(4)   | 1.513(3)   | C(27)-C(28) | 1.525(3) | C(52)-C(56) | 1.517(3) |
| C(2)-C(3)   | 1.401(3)   | C(27)-C(29) | 1.544(3) | C(53)-C(55) | 1.532(3) |
| C(3)-C(5)   | 1.519(3)   | C(30)-C(31) | 1.411(3) | C(53)-C(54) | 1.540(3) |
| C(6)-C(11)  | 1.412(3)   | C(30)-C(33) | 1.510(3) | C(56)-C(58) | 1.531(3) |
| C(6)-C(7)   | 1.416(3)   | C(31)-C(32) | 1.402(3) | C(56)-C(57) | 1.539(3) |
| C(7)-C(8)   | 1.397(3)   | C(32)-C(34) | 1.519(3) | C11-C11#1   | 1.524(9) |
| C(7)-C(12)  | 1.532(3)   | C(35)-C(40) | 1.414(3) | C11-C21     | 1.543(5) |
| C(8)-C(9)   | 1.399(3)   | C(35)-C(36) | 1.416(3) | C21-C31     | 1.542(6) |

**Table S11:** Bond angles [°] for **5** (jk\_460m).

|                   |             |                   |            |
|-------------------|-------------|-------------------|------------|
| Ga(2)-As(1)-Ga(1) | 110.566(13) | C(22)-C(21)-C(20) | 120.19(19) |
| N(1)-Ga(1)-N(2)   | 96.15(7)    | C(21)-C(22)-C(23) | 121.17(19) |
| N(1)-Ga(1)-Cl(1)  | 102.60(5)   | C(22)-C(23)-C(18) | 117.77(18) |
| N(2)-Ga(1)-Cl(1)  | 104.71(5)   | C(22)-C(23)-C(27) | 120.55(18) |
| N(1)-Ga(1)-As(1)  | 119.04(5)   | C(18)-C(23)-C(27) | 121.68(17) |
| N(2)-Ga(1)-As(1)  | 107.62(5)   | C(19)-C(24)-C(26) | 108.85(17) |
| Cl(1)-Ga(1)-As(1) | 122.75(2)   | C(19)-C(24)-C(25) | 112.88(17) |
| N(3)-Ga(2)-N(4)   | 96.14(7)    | C(26)-C(24)-C(25) | 110.58(17) |
| N(3)-Ga(2)-Cl(2)  | 103.51(5)   | C(23)-C(27)-C(28) | 111.79(17) |
| N(4)-Ga(2)-Cl(2)  | 104.13(5)   | C(23)-C(27)-C(29) | 112.55(19) |
| N(3)-Ga(2)-As(1)  | 119.41(5)   | C(28)-C(27)-C(29) | 109.74(19) |
| N(4)-Ga(2)-As(1)  | 107.50(4)   | N(3)-C(30)-C(31)  | 124.45(17) |
| Cl(2)-Ga(2)-As(1) | 122.145(19) | N(3)-C(30)-C(33)  | 119.12(17) |
| C(1)-N(1)-C(6)    | 118.67(16)  | C(31)-C(30)-C(33) | 116.43(17) |

|                   |            |                   |            |
|-------------------|------------|-------------------|------------|
| C(1)-N(1)-Ga(1)   | 118.61(13) | C(32)-C(31)-C(30) | 128.70(17) |
| C(6)-N(1)-Ga(1)   | 122.69(12) | N(4)-C(32)-C(31)  | 123.02(16) |
| C(3)-N(2)-C(18)   | 118.25(15) | N(4)-C(32)-C(34)  | 120.01(17) |
| C(3)-N(2)-Ga(1)   | 119.34(13) | C(31)-C(32)-C(34) | 116.98(17) |
| C(18)-N(2)-Ga(1)  | 122.09(12) | C(40)-C(35)-C(36) | 121.73(17) |
| C(30)-N(3)-C(35)  | 118.64(16) | C(40)-C(35)-N(3)  | 117.62(17) |
| C(30)-N(3)-Ga(2)  | 118.49(13) | C(36)-C(35)-N(3)  | 120.64(17) |
| C(35)-N(3)-Ga(2)  | 122.58(12) | C(37)-C(36)-C(35) | 118.0(2)   |
| C(32)-N(4)-C(47)  | 119.61(15) | C(37)-C(36)-C(41) | 118.95(19) |
| C(32)-N(4)-Ga(2)  | 119.50(12) | C(35)-C(36)-C(41) | 123.04(17) |
| C(47)-N(4)-Ga(2)  | 120.80(11) | C(38)-C(37)-C(36) | 121.1(2)   |
| N(1)-C(1)-C(2)    | 124.17(17) | C(37)-C(38)-C(39) | 120.2(2)   |
| N(1)-C(1)-C(4)    | 119.80(17) | C(38)-C(39)-C(40) | 121.6(2)   |
| C(2)-C(1)-C(4)    | 116.03(17) | C(39)-C(40)-C(35) | 117.4(2)   |
| C(3)-C(2)-C(1)    | 128.29(18) | C(39)-C(40)-C(44) | 120.66(19) |
| N(2)-C(3)-C(2)    | 123.39(17) | C(35)-C(40)-C(44) | 121.92(17) |
| N(2)-C(3)-C(5)    | 119.92(17) | C(36)-C(41)-C(43) | 109.80(19) |
| C(2)-C(3)-C(5)    | 116.68(17) | C(36)-C(41)-C(42) | 113.0(2)   |
| C(11)-C(6)-C(7)   | 121.56(17) | C(43)-C(41)-C(42) | 109.88(19) |
| C(11)-C(6)-N(1)   | 118.11(17) | C(46)-C(44)-C(40) | 112.9(2)   |
| C(7)-C(6)-N(1)    | 120.31(16) | C(46)-C(44)-C(45) | 109.8(2)   |
| C(8)-C(7)-C(6)    | 117.38(18) | C(40)-C(44)-C(45) | 111.8(2)   |
| C(8)-C(7)-C(12)   | 119.69(18) | C(48)-C(47)-C(52) | 121.20(17) |
| C(6)-C(7)-C(12)   | 122.92(17) | C(48)-C(47)-N(4)  | 120.71(16) |
| C(7)-C(8)-C(9)    | 121.76(19) | C(52)-C(47)-N(4)  | 118.07(17) |
| C(10)-C(9)-C(8)   | 119.86(19) | C(49)-C(48)-C(47) | 118.11(18) |
| C(9)-C(10)-C(11)  | 120.78(19) | C(49)-C(48)-C(53) | 119.31(19) |
| C(10)-C(11)-C(6)  | 118.61(18) | C(47)-C(48)-C(53) | 122.58(17) |
| C(10)-C(11)-C(15) | 119.41(18) | C(50)-C(49)-C(48) | 121.4(2)   |
| C(6)-C(11)-C(15)  | 121.92(17) | C(51)-C(50)-C(49) | 119.68(19) |
| C(14)-C(12)-C(7)  | 110.28(17) | C(50)-C(51)-C(52) | 121.09(19) |
| C(14)-C(12)-C(13) | 109.42(18) | C(51)-C(52)-C(47) | 118.5(2)   |
| C(7)-C(12)-C(13)  | 112.56(17) | C(51)-C(52)-C(56) | 119.96(18) |
| C(11)-C(15)-C(16) | 110.69(18) | C(47)-C(52)-C(56) | 121.57(17) |
| C(11)-C(15)-C(17) | 112.4(2)   | C(48)-C(53)-C(55) | 111.26(18) |
| C(16)-C(15)-C(17) | 110.1(2)   | C(48)-C(53)-C(54) | 111.12(16) |
| C(19)-C(18)-C(23) | 121.64(17) | C(55)-C(53)-C(54) | 110.11(19) |
| C(19)-C(18)-N(2)  | 119.42(16) | C(52)-C(56)-C(58) | 112.7(2)   |
| C(23)-C(18)-N(2)  | 118.92(16) | C(52)-C(56)-C(57) | 111.68(18) |
| C(20)-C(19)-C(18) | 118.00(18) | C(58)-C(56)-C(57) | 109.94(18) |
| C(20)-C(19)-C(24) | 118.94(17) | C11#1-C11-C21     | 111.8(5)   |
| C(18)-C(19)-C(24) | 123.00(17) | C31-C21-C11       | 111.8(4)   |
| C(21)-C(20)-C(19) | 121.11(19) |                   |            |



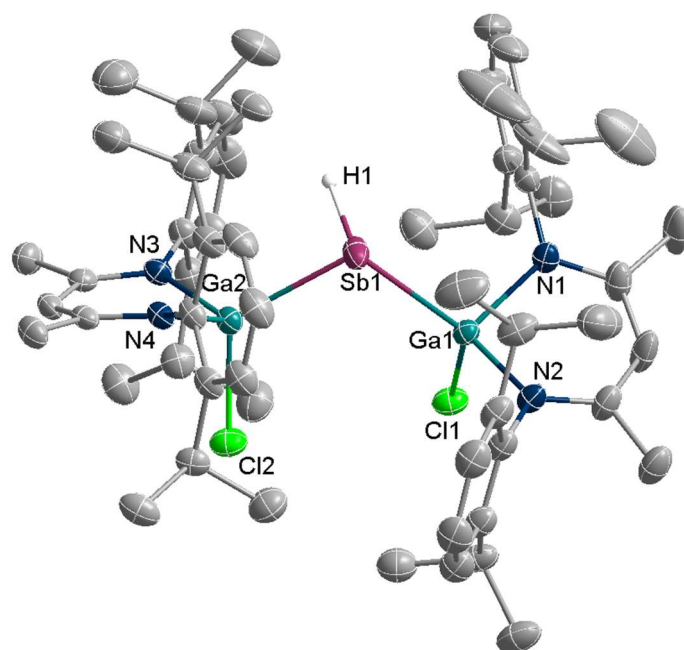

**Fig. S41.** Solid state structure of **6**. Hydrogen atoms except for Sb-H are omitted for clarity. H1 is displayed as sphere of arbitrary radius. Displacement ellipsoids drawn at 50% probability levels.

**Table S12:** Bond lengths [Å] for **6** (jk\_489m).

|             |            |             |          |             |          |
|-------------|------------|-------------|----------|-------------|----------|
| Sb(1)-Ga(2) | 2.5669(3)  | C(9)-C(10)  | 1.369(5) | C(36)-C(37) | 1.393(4) |
| Sb(1)-Ga(1) | 2.5803(3)  | C(10)-C(11) | 1.390(4) | C(36)-C(41) | 1.525(4) |
| Ga(1)-N(2)  | 1.9552(19) | C(11)-C(15) | 1.515(4) | C(37)-C(38) | 1.380(5) |
| Ga(1)-N(1)  | 1.9571(19) | C(12)-C(14) | 1.526(4) | C(38)-C(39) | 1.371(5) |
| Ga(1)-Cl(1) | 2.2161(6)  | C(12)-C(13) | 1.538(4) | C(39)-C(40) | 1.401(4) |
| Ga(2)-N(3)  | 1.9613(19) | C(15)-C(16) | 1.504(7) | C(40)-C(44) | 1.515(4) |
| Ga(2)-N(4)  | 1.9702(18) | C(15)-C(17) | 1.530(6) | C(41)-C(43) | 1.521(4) |
| Ga(2)-Cl(2) | 2.2012(6)  | C(18)-C(19) | 1.407(4) | C(41)-C(42) | 1.533(5) |
| N(1)-C(1)   | 1.328(3)   | C(18)-C(23) | 1.408(3) | C(44)-C(46) | 1.533(4) |
| N(1)-C(6)   | 1.448(3)   | C(19)-C(20) | 1.401(3) | C(44)-C(45) | 1.538(4) |
| N(2)-C(3)   | 1.338(3)   | C(19)-C(24) | 1.524(4) | C(47)-C(52) | 1.402(3) |
| N(2)-C(18)  | 1.449(3)   | C(20)-C(21) | 1.384(4) | C(47)-C(48) | 1.410(3) |
| N(3)-C(30)  | 1.331(3)   | C(21)-C(22) | 1.373(4) | C(48)-C(49) | 1.397(4) |
| N(3)-C(35)  | 1.452(3)   | C(22)-C(23) | 1.397(3) | C(48)-C(53) | 1.517(4) |
| N(4)-C(32)  | 1.328(3)   | C(23)-C(27) | 1.510(4) | C(49)-C(50) | 1.381(4) |
| N(4)-C(47)  | 1.449(3)   | C(24)-C(26) | 1.530(4) | C(50)-C(51) | 1.381(4) |
| C(1)-C(2)   | 1.397(4)   | C(24)-C(25) | 1.534(4) | C(51)-C(52) | 1.398(3) |
| C(1)-C(4)   | 1.510(4)   | C(27)-C(29) | 1.522(4) | C(52)-C(56) | 1.521(3) |
| C(2)-C(3)   | 1.402(4)   | C(27)-C(28) | 1.524(5) | C(53)-C(54) | 1.530(4) |
| C(3)-C(5)   | 1.512(3)   | C(30)-C(31) | 1.407(3) | C(53)-C(55) | 1.532(4) |
| C(6)-C(7)   | 1.397(3)   | C(30)-C(33) | 1.504(3) | C(56)-C(58) | 1.528(4) |
| C(6)-C(11)  | 1.405(4)   | C(31)-C(32) | 1.396(3) | C(56)-C(57) | 1.533(3) |

|            |          |             |          |           |           |
|------------|----------|-------------|----------|-----------|-----------|
| C(7)-C(8)  | 1.395(4) | C(32)-C(34) | 1.510(3) | C11-C11#1 | 1.516(10) |
| C(7)-C(12) | 1.512(4) | C(35)-C(36) | 1.405(3) | C11-C21   | 1.546(6)  |
| C(8)-C(9)  | 1.371(5) | C(35)-C(40) | 1.407(4) | C21-C31   | 1.533(7)  |

**Table S13:** Bond angles [°] for **6** (jk\_489m).

|                   |             |                   |          |
|-------------------|-------------|-------------------|----------|
| Ga(2)-Sb(1)-Ga(1) | 107.412(10) | C(22)-C(21)-C(20) | 120.0(2) |
| N(2)-Ga(1)-N(1)   | 96.04(8)    | C(21)-C(22)-C(23) | 121.4(3) |
| N(2)-Ga(1)-Cl(1)  | 102.85(6)   | C(22)-C(23)-C(18) | 117.9(2) |
| N(1)-Ga(1)-Cl(1)  | 104.81(6)   | C(22)-C(23)-C(27) | 120.0(2) |
| N(2)-Ga(1)-Sb(1)  | 121.54(6)   | C(18)-C(23)-C(27) | 122.1(2) |
| N(1)-Ga(1)-Sb(1)  | 105.38(6)   | C(19)-C(24)-C(26) | 110.1(2) |
| Cl(1)-Ga(1)-Sb(1) | 122.00(2)   | C(19)-C(24)-C(25) | 112.5(2) |
| N(3)-Ga(2)-N(4)   | 96.09(8)    | C(26)-C(24)-C(25) | 109.7(2) |
| N(3)-Ga(2)-Cl(2)  | 103.88(6)   | C(23)-C(27)-C(29) | 112.8(3) |
| N(4)-Ga(2)-Cl(2)  | 104.63(6)   | C(23)-C(27)-C(28) | 111.1(2) |
| N(3)-Ga(2)-Sb(1)  | 119.88(5)   | C(29)-C(27)-C(28) | 110.2(3) |
| N(4)-Ga(2)-Sb(1)  | 108.07(5)   | N(3)-C(30)-C(31)  | 123.9(2) |
| Cl(2)-Ga(2)-Sb(1) | 120.62(2)   | N(3)-C(30)-C(33)  | 119.4(2) |
| C(1)-N(1)-C(6)    | 119.3(2)    | C(31)-C(30)-C(33) | 116.7(2) |
| C(1)-N(1)-Ga(1)   | 119.18(17)  | C(32)-C(31)-C(30) | 129.1(2) |
| C(6)-N(1)-Ga(1)   | 121.27(14)  | N(4)-C(32)-C(31)  | 123.2(2) |
| C(3)-N(2)-C(18)   | 118.68(19)  | N(4)-C(32)-C(34)  | 119.9(2) |
| C(3)-N(2)-Ga(1)   | 118.45(15)  | C(31)-C(32)-C(34) | 117.0(2) |
| C(18)-N(2)-Ga(1)  | 122.79(15)  | C(36)-C(35)-C(40) | 121.5(2) |
| C(30)-N(3)-C(35)  | 118.65(19)  | C(36)-C(35)-N(3)  | 118.1(2) |
| C(30)-N(3)-Ga(2)  | 118.80(15)  | C(40)-C(35)-N(3)  | 120.4(2) |
| C(35)-N(3)-Ga(2)  | 122.28(15)  | C(37)-C(36)-C(35) | 117.9(3) |
| C(32)-N(4)-C(47)  | 120.15(18)  | C(37)-C(36)-C(41) | 120.6(2) |
| C(32)-N(4)-Ga(2)  | 119.50(15)  | C(35)-C(36)-C(41) | 121.4(2) |
| C(47)-N(4)-Ga(2)  | 120.25(14)  | C(38)-C(37)-C(36) | 121.1(3) |
| N(1)-C(1)-C(2)    | 123.0(2)    | C(39)-C(38)-C(37) | 120.5(3) |
| N(1)-C(1)-C(4)    | 119.8(2)    | C(38)-C(39)-C(40) | 121.1(3) |
| C(2)-C(1)-C(4)    | 117.1(2)    | C(39)-C(40)-C(35) | 117.8(3) |
| C(1)-C(2)-C(3)    | 128.9(2)    | C(39)-C(40)-C(44) | 119.3(2) |
| N(2)-C(3)-C(2)    | 123.7(2)    | C(35)-C(40)-C(44) | 122.9(2) |
| N(2)-C(3)-C(5)    | 119.7(2)    | C(43)-C(41)-C(36) | 113.0(3) |
| C(2)-C(3)-C(5)    | 116.6(2)    | C(43)-C(41)-C(42) | 109.7(3) |
| C(7)-C(6)-C(11)   | 121.1(2)    | C(36)-C(41)-C(42) | 111.7(3) |
| C(7)-C(6)-N(1)    | 119.8(2)    | C(40)-C(44)-C(46) | 109.6(2) |
| C(11)-C(6)-N(1)   | 119.1(2)    | C(40)-C(44)-C(45) | 113.1(2) |
| C(8)-C(7)-C(6)    | 118.0(2)    | C(46)-C(44)-C(45) | 110.0(2) |
| C(8)-C(7)-C(12)   | 118.9(2)    | C(52)-C(47)-C(48) | 121.5(2) |
| C(6)-C(7)-C(12)   | 123.1(2)    | C(52)-C(47)-N(4)  | 120.2(2) |

|                   |          |                   |          |
|-------------------|----------|-------------------|----------|
| C(9)-C(8)-C(7)    | 121.6(3) | C(48)-C(47)-N(4)  | 118.2(2) |
| C(10)-C(9)-C(8)   | 119.6(3) | C(49)-C(48)-C(47) | 118.0(2) |
| C(9)-C(10)-C(11)  | 121.7(3) | C(49)-C(48)-C(53) | 120.4(2) |
| C(10)-C(11)-C(6)  | 117.9(3) | C(47)-C(48)-C(53) | 121.6(2) |
| C(10)-C(11)-C(15) | 120.5(3) | C(50)-C(49)-C(48) | 121.2(2) |
| C(6)-C(11)-C(15)  | 121.5(3) | C(49)-C(50)-C(51) | 119.9(2) |
| C(7)-C(12)-C(14)  | 109.3(2) | C(50)-C(51)-C(52) | 121.5(3) |
| C(7)-C(12)-C(13)  | 112.0(2) | C(51)-C(52)-C(47) | 117.8(2) |
| C(14)-C(12)-C(13) | 111.2(2) | C(51)-C(52)-C(56) | 119.3(2) |
| C(16)-C(15)-C(11) | 111.2(3) | C(47)-C(52)-C(56) | 122.9(2) |
| C(16)-C(15)-C(17) | 110.0(4) | C(48)-C(53)-C(54) | 111.5(2) |
| C(11)-C(15)-C(17) | 112.8(4) | C(48)-C(53)-C(55) | 112.9(3) |
| C(19)-C(18)-C(23) | 121.7(2) | C(54)-C(53)-C(55) | 109.8(2) |
| C(19)-C(18)-N(2)  | 120.4(2) | C(52)-C(56)-C(58) | 110.6(2) |
| C(23)-C(18)-N(2)  | 117.9(2) | C(52)-C(56)-C(57) | 111.7(2) |
| C(20)-C(19)-C(18) | 117.4(2) | C(58)-C(56)-C(57) | 109.7(2) |
| C(20)-C(19)-C(24) | 119.5(2) | C11#1-C11-C21     | 111.6(5) |
| C(18)-C(19)-C(24) | 123.1(2) | C31-C21-C11       | 111.8(4) |
| C(21)-C(20)-C(19) | 121.5(3) | C(22)-C(21)-C(20) | 120.0(2) |

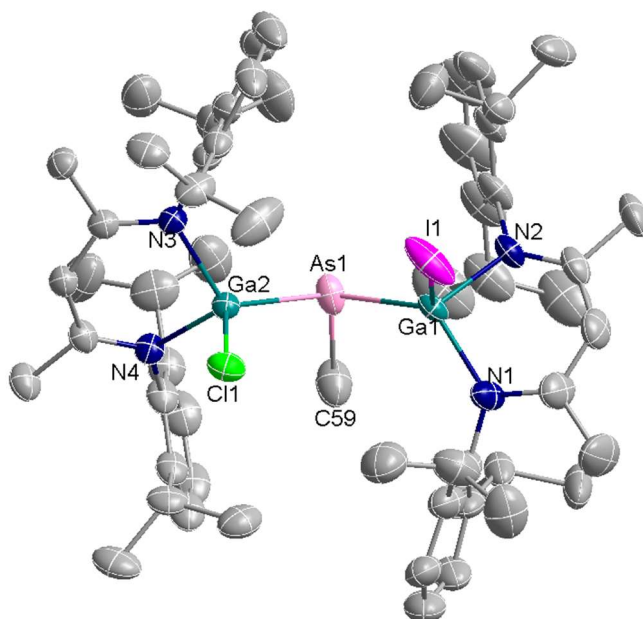

**Fig. S42.** Solid state structure of **7**. Hydrogen atoms and minor component of the disorder are omitted for clarity. Displacement ellipsoids drawn at 50% probability levels.

**Table S14:** Bond lengths [Å] for **7** (jk\_577m).

|              |            |               |           |             |          |
|--------------|------------|---------------|-----------|-------------|----------|
| I(1)-Ga(1)   | 2.5169(7)  | C(10)-C(11)   | 1.397(10) | C(27)-C(29) | 1.534(9) |
| Cl(1)-Ga(2)  | 2.193(5)   | C(11)-C(15)   | 1.530(12) | C(30)-C(31) | 1.402(5) |
| Cl(1')-Ga(1) | 2.166(6)   | C(12)-C(13)   | 1.540(10) | C(30)-C(33) | 1.513(5) |
| I(1')-Ga(2)  | 2.5197(19) | C(12)-C(14)   | 1.548(10) | C(31)-C(32) | 1.398(5) |
| As(1)-C(59)  | 1.939(6)   | C(15)-C(16)   | 1.521(13) | C(32)-C(34) | 1.510(5) |
| As(1)-Ga(2)  | 2.3946(6)  | C(15)-C(17)   | 1.552(13) | C(35)-C(40) | 1.400(6) |
| As(1)-Ga(1)  | 2.4232(6)  | C(6')-C(7')   | 1.382(11) | C(35)-C(36) | 1.413(6) |
| Ga(1)-N(1)   | 1.967(3)   | C(6')-C(11')  | 1.393(10) | C(36)-C(37) | 1.400(6) |
| Ga(1)-N(2)   | 1.975(3)   | C(7')-C(8')   | 1.396(11) | C(36)-C(41) | 1.505(7) |
| Ga(2)-N(3)   | 1.974(3)   | C(7')-C(12')  | 1.510(12) | C(37)-C(38) | 1.369(9) |
| Ga(2)-N(4)   | 1.976(3)   | C(8')-C(9')   | 1.376(11) | C(38)-C(39) | 1.377(9) |
| N(1)-C(1)    | 1.338(6)   | C(9')-C(10')  | 1.381(11) | C(39)-C(40) | 1.398(6) |
| N(1)-C(6')   | 1.418(16)  | C(10')-C(11') | 1.387(10) | C(40)-C(44) | 1.529(7) |
| N(1)-C(6)    | 1.493(13)  | C(11')-C(15') | 1.501(13) | C(41)-C(43) | 1.536(7) |
| N(2)-C(3)    | 1.321(5)   | C(12')-C(14') | 1.523(13) | C(41)-C(42) | 1.544(6) |
| N(2)-C(18)   | 1.441(5)   | C(12')-C(13') | 1.544(12) | C(44)-C(45) | 1.523(7) |
| N(3)-C(30)   | 1.323(5)   | C(15')-C(16') | 1.530(10) | C(44)-C(46) | 1.539(7) |
| N(3)-C(35)   | 1.449(5)   | C(15')-C(17') | 1.534(11) | C(47)-C(52) | 1.403(6) |
| N(4)-C(32)   | 1.333(5)   | C(18)-C(19)   | 1.387(7)  | C(47)-C(48) | 1.405(6) |
| N(4)-C(47)   | 1.442(4)   | C(18)-C(23)   | 1.414(7)  | C(48)-C(49) | 1.403(5) |
| C(1)-C(2)    | 1.389(7)   | C(19)-C(20)   | 1.403(7)  | C(48)-C(53) | 1.509(6) |
| C(1)-C(4)    | 1.514(7)   | C(19)-C(24)   | 1.515(7)  | C(49)-C(50) | 1.375(8) |
| C(2)-C(3)    | 1.401(7)   | C(20)-C(21)   | 1.390(10) | C(50)-C(51) | 1.382(8) |
| C(3)-C(5)    | 1.506(6)   | C(21)-C(22)   | 1.329(11) | C(51)-C(52) | 1.403(6) |
| C(6)-C(7)    | 1.390(10)  | C(22)-C(23)   | 1.385(9)  | C(52)-C(56) | 1.514(7) |
| C(6)-C(11)   | 1.400(10)  | C(23)-C(27)   | 1.522(9)  | C(53)-C(55) | 1.518(7) |
| C(7)-C(8)    | 1.397(9)   | C(24)-C(26)   | 1.521(7)  | C(53)-C(54) | 1.532(6) |
| C(7)-C(12)   | 1.521(11)  | C(24)-C(25)   | 1.536(6)  | C(56)-C(58) | 1.514(9) |
| C(8)-C(9)    | 1.372(10)  | C(27)-C(28)   | 1.524(11) | C(56)-C(57) | 1.520(9) |
| C(9)-C(10)   | 1.379(10)  |               |           |             |          |

**Table S15:** Bond angles [°] for **7** (jk\_577m).

|                    |            |                      |           |
|--------------------|------------|----------------------|-----------|
| C(59)-As(1)-Ga(2)  | 102.30(18) | C(10')-C(11')-C(15') | 118.4(12) |
| C(59)-As(1)-Ga(1)  | 99.36(18)  | C(6')-C(11')-C(15')  | 121.7(12) |
| Ga(2)-As(1)-Ga(1)  | 110.14(2)  | C(7')-C(12')-C(14')  | 109.2(11) |
| N(1)-Ga(1)-N(2)    | 95.15(15)  | C(7')-C(12')-C(13')  | 111.0(11) |
| N(1)-Ga(1)-Cl(1')  | 103.9(3)   | C(14')-C(12')-C(13') | 109.3(9)  |
| N(2)-Ga(1)-Cl(1')  | 104.4(2)   | C(11')-C(15')-C(16') | 110.1(14) |
| N(1)-Ga(1)-As(1)   | 122.38(10) | C(11')-C(15')-C(17') | 108.2(11) |
| N(2)-Ga(1)-As(1)   | 107.93(10) | C(16')-C(15')-C(17') | 109.9(8)  |
| Cl(1')-Ga(1)-As(1) | 119.2(3)   | C(19)-C(18)-C(23)    | 121.3(5)  |

|                   |            |                   |          |
|-------------------|------------|-------------------|----------|
| N(1)-Ga(1)-I(1)   | 106.25(11) | C(19)-C(18)-N(2)  | 121.1(4) |
| N(2)-Ga(1)-I(1)   | 101.40(9)  | C(23)-C(18)-N(2)  | 117.5(4) |
| As(1)-Ga(1)-I(1)  | 118.99(3)  | C(18)-C(19)-C(20) | 116.9(5) |
| N(3)-Ga(2)-N(4)   | 95.57(12)  | C(18)-C(19)-C(24) | 123.6(4) |
| N(3)-Ga(2)-Cl(1)  | 103.12(19) | C(20)-C(19)-C(24) | 119.5(5) |
| N(4)-Ga(2)-Cl(1)  | 104.0(2)   | C(21)-C(20)-C(19) | 121.3(6) |
| N(3)-Ga(2)-As(1)  | 118.83(9)  | C(22)-C(21)-C(20) | 120.6(5) |
| N(4)-Ga(2)-As(1)  | 110.91(9)  | C(21)-C(22)-C(23) | 121.3(6) |
| Cl(1)-Ga(2)-As(1) | 120.70(19) | C(22)-C(23)-C(18) | 118.5(6) |
| N(3)-Ga(2)-I(1')  | 99.97(11)  | C(22)-C(23)-C(27) | 120.6(5) |
| N(4)-Ga(2)-I(1')  | 105.55(12) | C(18)-C(23)-C(27) | 120.9(5) |
| As(1)-Ga(2)-I(1') | 122.15(8)  | C(19)-C(24)-C(26) | 110.2(4) |
| C(1)-N(1)-C(6')   | 110.1(10)  | C(19)-C(24)-C(25) | 112.5(5) |
| C(1)-N(1)-C(6)    | 120.7(8)   | C(26)-C(24)-C(25) | 109.6(5) |
| C(1)-N(1)-Ga(1)   | 117.5(3)   | C(23)-C(27)-C(28) | 112.5(5) |
| C(6')-N(1)-Ga(1)  | 132.4(10)  | C(23)-C(27)-C(29) | 113.9(7) |
| C(6)-N(1)-Ga(1)   | 121.3(7)   | C(28)-C(27)-C(29) | 110.4(6) |
| C(3)-N(2)-C(18)   | 119.8(3)   | N(3)-C(30)-C(31)  | 124.2(3) |
| C(3)-N(2)-Ga(1)   | 119.1(3)   | N(3)-C(30)-C(33)  | 120.3(3) |
| C(18)-N(2)-Ga(1)  | 120.9(3)   | C(31)-C(30)-C(33) | 115.5(3) |
| C(30)-N(3)-C(35)  | 118.4(3)   | C(32)-C(31)-C(30) | 128.8(3) |
| C(30)-N(3)-Ga(2)  | 118.9(2)   | N(4)-C(32)-C(31)  | 123.2(3) |
| C(35)-N(3)-Ga(2)  | 122.3(2)   | N(4)-C(32)-C(34)  | 119.6(3) |
| C(32)-N(4)-C(47)  | 118.1(3)   | C(31)-C(32)-C(34) | 117.2(3) |
| C(32)-N(4)-Ga(2)  | 118.9(2)   | C(40)-C(35)-C(36) | 121.6(4) |
| C(47)-N(4)-Ga(2)  | 122.9(2)   | C(40)-C(35)-N(3)  | 118.4(3) |
| N(1)-C(1)-C(2)    | 125.0(4)   | C(36)-C(35)-N(3)  | 120.0(4) |
| N(1)-C(1)-C(4)    | 119.8(5)   | C(37)-C(36)-C(35) | 117.4(5) |
| C(2)-C(1)-C(4)    | 115.1(5)   | C(37)-C(36)-C(41) | 118.6(4) |
| C(1)-C(2)-C(3)    | 127.7(4)   | C(35)-C(36)-C(41) | 124.1(4) |
| N(2)-C(3)-C(2)    | 123.2(4)   | C(38)-C(37)-C(36) | 121.5(5) |
| N(2)-C(3)-C(5)    | 120.7(4)   | C(37)-C(38)-C(39) | 120.4(4) |
| C(2)-C(3)-C(5)    | 116.1(4)   | C(38)-C(39)-C(40) | 121.1(5) |
| C(7)-C(6)-C(11)   | 120.5(7)   | C(39)-C(40)-C(35) | 118.0(5) |
| C(7)-C(6)-N(1)    | 122.7(10)  | C(39)-C(40)-C(44) | 120.8(4) |
| C(11)-C(6)-N(1)   | 116.4(10)  | C(35)-C(40)-C(44) | 121.2(4) |
| C(6)-C(7)-C(8)    | 119.2(7)   | C(36)-C(41)-C(43) | 113.1(5) |
| C(6)-C(7)-C(12)   | 123.4(9)   | C(36)-C(41)-C(42) | 111.3(4) |
| C(8)-C(7)-C(12)   | 117.4(9)   | C(43)-C(41)-C(42) | 108.0(4) |
| C(9)-C(8)-C(7)    | 120.2(8)   | C(45)-C(44)-C(40) | 110.5(4) |
| C(8)-C(9)-C(10)   | 120.1(8)   | C(45)-C(44)-C(46) | 112.3(5) |
| C(9)-C(10)-C(11)  | 120.6(8)   | C(40)-C(44)-C(46) | 111.9(4) |
| C(10)-C(11)-C(6)  | 118.4(8)   | C(52)-C(47)-C(48) | 121.6(4) |

|                     |           |                   |          |
|---------------------|-----------|-------------------|----------|
| C(10)-C(11)-C(15)   | 117.0(12) | C(52)-C(47)-N(4)  | 118.5(4) |
| C(6)-C(11)-C(15)    | 124.3(12) | C(48)-C(47)-N(4)  | 119.9(3) |
| C(7)-C(12)-C(13)    | 114.2(10) | C(49)-C(48)-C(47) | 117.9(4) |
| C(7)-C(12)-C(14)    | 111.8(8)  | C(49)-C(48)-C(53) | 119.2(4) |
| C(13)-C(12)-C(14)   | 108.3(7)  | C(47)-C(48)-C(53) | 122.9(3) |
| C(16)-C(15)-C(11)   | 115.8(15) | C(50)-C(49)-C(48) | 121.3(5) |
| C(16)-C(15)-C(17)   | 109.4(12) | C(49)-C(50)-C(51) | 120.2(4) |
| C(11)-C(15)-C(17)   | 115.1(15) | C(50)-C(51)-C(52) | 121.0(5) |
| C(7')-C(6')-C(11')  | 119.9(9)  | C(51)-C(52)-C(47) | 118.0(5) |
| C(7')-C(6')-N(1)    | 118.2(12) | C(51)-C(52)-C(56) | 119.5(4) |
| C(11')-C(6')-N(1)   | 121.9(12) | C(47)-C(52)-C(56) | 122.5(4) |
| C(6')-C(7')-C(8')   | 119.9(8)  | C(48)-C(53)-C(55) | 110.9(4) |
| C(6')-C(7')-C(12')  | 120.3(12) | C(48)-C(53)-C(54) | 111.1(4) |
| C(8')-C(7')-C(12')  | 119.6(13) | C(55)-C(53)-C(54) | 111.3(4) |
| C(9')-C(8')-C(7')   | 119.9(9)  | C(52)-C(56)-C(58) | 113.3(5) |
| C(8')-C(9')-C(10')  | 120.0(9)  | C(52)-C(56)-C(57) | 111.5(5) |
| C(9')-C(10')-C(11') | 120.4(9)  | C(58)-C(56)-C(57) | 109.8(5) |
| C(10')-C(11')-C(6') | 119.4(9)  |                   |          |

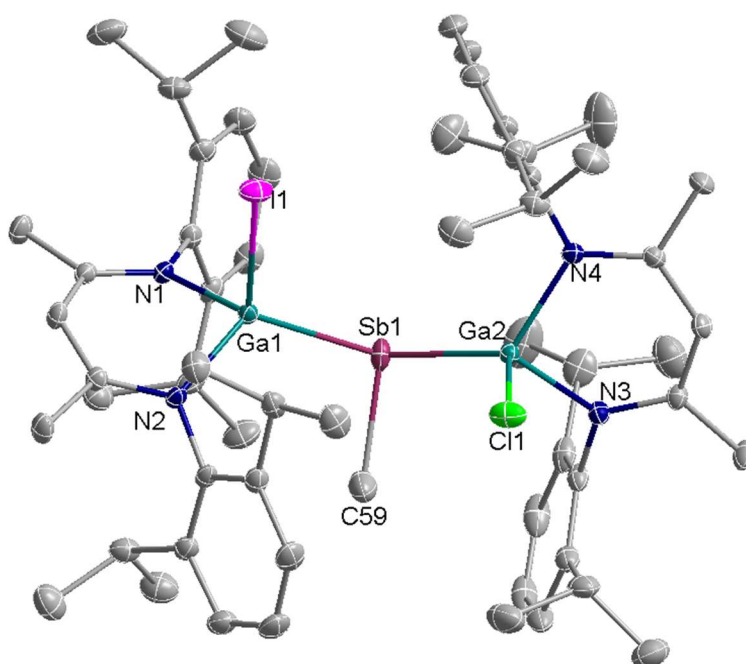

**Fig. S43.** Solid state structure of **8**. Hydrogen atoms and minor component of the disorder are omitted for clarity. Displacement ellipsoids drawn at 50% probability levels.

**Table S16:** Bond lengths [Å] for **8** (jk\_573m).

|              |            |             |          |             |          |
|--------------|------------|-------------|----------|-------------|----------|
| I(1)-Ga(1)   | 2.5973(6)  | C(7)-C(8)   | 1.402(3) | C(32)-C(34) | 1.507(3) |
| Cl(1)-Ga(2)  | 2.2300(14) | C(7)-C(12)  | 1.524(3) | C(35)-C(36) | 1.408(3) |
| I(1')-Ga(2)  | 2.495(5)   | C(8)-C(9)   | 1.381(4) | C(35)-C(40) | 1.411(3) |
| Cl(1')-Ga(1) | 2.228(8)   | C(9)-C(10)  | 1.390(4) | C(36)-C(37) | 1.401(3) |
| Sb(1)-C(59)  | 2.164(3)   | C(10)-C(11) | 1.393(3) | C(36)-C(41) | 1.526(4) |
| Sb(1)-Ga(1)  | 2.6118(6)  | C(11)-C(15) | 1.524(3) | C(37)-C(38) | 1.384(4) |
| Sb(1)-Ga(2)  | 2.6132(5)  | C(12)-C(14) | 1.534(4) | C(38)-C(39) | 1.387(5) |
| Ga(1)-N(2)   | 1.9700(17) | C(12)-C(13) | 1.546(4) | C(39)-C(40) | 1.397(3) |
| Ga(1)-N(1)   | 1.9942(17) | C(15)-C(17) | 1.532(3) | C(40)-C(44) | 1.522(4) |
| Ga(2)-N(4)   | 1.9544(18) | C(15)-C(16) | 1.544(3) | C(41)-C(43) | 1.535(4) |
| Ga(2)-N(3)   | 1.9759(18) | C(18)-C(19) | 1.416(3) | C(41)-C(42) | 1.540(4) |
| N(1)-C(1)    | 1.329(3)   | C(18)-C(23) | 1.418(3) | C(44)-C(45) | 1.530(4) |
| N(1)-C(6)    | 1.449(3)   | C(19)-C(20) | 1.399(3) | C(44)-C(46) | 1.537(4) |
| N(2)-C(3)    | 1.341(3)   | C(19)-C(24) | 1.528(3) | C(47)-C(48) | 1.410(3) |
| N(2)-C(18)   | 1.451(3)   | C(20)-C(21) | 1.385(4) | C(47)-C(52) | 1.414(3) |
| N(3)-C(30)   | 1.330(3)   | C(21)-C(22) | 1.380(4) | C(48)-C(49) | 1.402(3) |
| N(3)-C(35)   | 1.443(3)   | C(22)-C(23) | 1.400(3) | C(48)-C(53) | 1.525(3) |
| N(4)-C(32)   | 1.335(3)   | C(23)-C(27) | 1.530(3) | C(49)-C(50) | 1.392(4) |
| N(4)-C(47)   | 1.452(3)   | C(24)-C(26) | 1.536(3) | C(50)-C(51) | 1.379(4) |
| C(1)-C(2)    | 1.411(3)   | C(24)-C(25) | 1.537(3) | C(51)-C(52) | 1.395(3) |
| C(1)-C(4)    | 1.513(3)   | C(27)-C(29) | 1.533(4) | C(52)-C(56) | 1.521(3) |
| C(2)-C(3)    | 1.403(3)   | C(27)-C(28) | 1.538(4) | C(53)-C(55) | 1.531(3) |
| C(3)-C(5)    | 1.510(3)   | C(30)-C(31) | 1.404(3) | C(53)-C(54) | 1.539(3) |
| C(6)-C(7)    | 1.410(3)   | C(30)-C(33) | 1.510(3) | C(56)-C(57) | 1.513(4) |
| C(6)-C(11)   | 1.415(3)   | C(31)-C(32) | 1.404(3) | C(56)-C(58) | 1.530(4) |

**Table S17:** Bond angles [°] for **8** (jk\_573m).

|                    |             |                   |            |
|--------------------|-------------|-------------------|------------|
| C(59)-Sb(1)-Ga(1)  | 96.54(8)    | C(23)-C(18)-N(2)  | 118.77(18) |
| C(59)-Sb(1)-Ga(2)  | 94.69(9)    | C(20)-C(19)-C(18) | 117.7(2)   |
| Ga(1)-Sb(1)-Ga(2)  | 111.076(12) | C(20)-C(19)-C(24) | 120.1(2)   |
| N(2)-Ga(1)-N(1)    | 94.89(7)    | C(18)-C(19)-C(24) | 122.26(19) |
| N(2)-Ga(1)-Cl(1')  | 107.1(3)    | C(21)-C(20)-C(19) | 121.6(2)   |
| N(1)-Ga(1)-Cl(1')  | 102.0(3)    | C(22)-C(21)-C(20) | 120.0(2)   |
| N(2)-Ga(1)-I(1)    | 107.53(5)   | C(21)-C(22)-C(23) | 121.5(2)   |
| N(1)-Ga(1)-I(1)    | 100.66(5)   | C(22)-C(23)-C(18) | 117.7(2)   |
| N(2)-Ga(1)-Sb(1)   | 121.26(5)   | C(22)-C(23)-C(27) | 118.0(2)   |
| N(1)-Ga(1)-Sb(1)   | 109.41(5)   | C(18)-C(23)-C(27) | 124.19(19) |
| Cl(1')-Ga(1)-Sb(1) | 118.1(3)    | C(19)-C(24)-C(26) | 113.22(19) |
| I(1)-Ga(1)-Sb(1)   | 118.477(16) | C(19)-C(24)-C(25) | 113.43(18) |
| N(4)-Ga(2)-N(3)    | 95.48(7)    | C(26)-C(24)-C(25) | 107.4(2)   |
| N(4)-Ga(2)-Cl(1)   | 102.89(8)   | C(23)-C(27)-C(29) | 114.1(2)   |

|                   |            |                   |            |
|-------------------|------------|-------------------|------------|
| N(3)-Ga(2)-Cl(1)  | 101.54(9)  | C(23)-C(27)-C(28) | 109.8(2)   |
| N(4)-Ga(2)-I(1')  | 103.93(19) | C(29)-C(27)-C(28) | 107.0(2)   |
| N(3)-Ga(2)-I(1')  | 101.96(19) | N(3)-C(30)-C(31)  | 122.63(19) |
| N(4)-Ga(2)-Sb(1)  | 122.12(5)  | N(3)-C(30)-C(33)  | 120.53(19) |
| N(3)-Ga(2)-Sb(1)  | 108.23(5)  | C(31)-C(30)-C(33) | 116.83(18) |
| Cl(1)-Ga(2)-Sb(1) | 121.70(7)  | C(32)-C(31)-C(30) | 128.37(19) |
| I(1')-Ga(2)-Sb(1) | 120.5(2)   | N(4)-C(32)-C(31)  | 124.64(19) |
| C(1)-N(1)-C(6)    | 122.38(17) | N(4)-C(32)-C(34)  | 119.60(18) |
| C(1)-N(1)-Ga(1)   | 118.52(14) | C(31)-C(32)-C(34) | 115.75(18) |
| C(6)-N(1)-Ga(1)   | 118.86(13) | C(36)-C(35)-C(40) | 122.4(2)   |
| C(3)-N(2)-C(18)   | 119.50(17) | C(36)-C(35)-N(3)  | 120.1(2)   |
| C(3)-N(2)-Ga(1)   | 117.42(14) | C(40)-C(35)-N(3)  | 117.3(2)   |
| C(18)-N(2)-Ga(1)  | 123.06(13) | C(37)-C(36)-C(35) | 117.4(2)   |
| C(30)-N(3)-C(35)  | 120.35(17) | C(37)-C(36)-C(41) | 118.6(2)   |
| C(30)-N(3)-Ga(2)  | 121.01(14) | C(35)-C(36)-C(41) | 124.0(2)   |
| C(35)-N(3)-Ga(2)  | 118.59(13) | C(38)-C(37)-C(36) | 121.2(3)   |
| C(32)-N(4)-C(47)  | 119.80(17) | C(37)-C(38)-C(39) | 120.3(2)   |
| C(32)-N(4)-Ga(2)  | 120.07(14) | C(38)-C(39)-C(40) | 121.2(3)   |
| C(47)-N(4)-Ga(2)  | 119.98(13) | C(39)-C(40)-C(35) | 117.4(3)   |
| N(1)-C(1)-C(2)    | 123.08(18) | C(39)-C(40)-C(44) | 120.3(2)   |
| N(1)-C(1)-C(4)    | 120.96(19) | C(35)-C(40)-C(44) | 122.3(2)   |
| C(2)-C(1)-C(4)    | 115.94(18) | C(36)-C(41)-C(43) | 112.1(2)   |
| C(3)-C(2)-C(1)    | 128.00(19) | C(36)-C(41)-C(42) | 111.1(2)   |
| N(2)-C(3)-C(2)    | 123.87(18) | C(43)-C(41)-C(42) | 109.3(2)   |
| N(2)-C(3)-C(5)    | 120.31(18) | C(40)-C(44)-C(45) | 111.2(2)   |
| C(2)-C(3)-C(5)    | 115.81(18) | C(40)-C(44)-C(46) | 113.6(3)   |
| C(7)-C(6)-C(11)   | 120.64(19) | C(45)-C(44)-C(46) | 109.8(2)   |
| C(7)-C(6)-N(1)    | 121.41(19) | C(48)-C(47)-C(52) | 121.18(19) |
| C(11)-C(6)-N(1)   | 117.73(18) | C(48)-C(47)-N(4)  | 120.37(18) |
| C(8)-C(7)-C(6)    | 118.1(2)   | C(52)-C(47)-N(4)  | 118.44(19) |
| C(8)-C(7)-C(12)   | 118.2(2)   | C(49)-C(48)-C(47) | 117.8(2)   |
| C(6)-C(7)-C(12)   | 123.7(2)   | C(49)-C(48)-C(53) | 118.6(2)   |
| C(9)-C(8)-C(7)    | 121.7(2)   | C(47)-C(48)-C(53) | 123.59(19) |
| C(8)-C(9)-C(10)   | 119.6(2)   | C(50)-C(49)-C(48) | 121.3(2)   |
| C(9)-C(10)-C(11)  | 121.2(2)   | C(51)-C(50)-C(49) | 119.9(2)   |
| C(10)-C(11)-C(6)  | 118.7(2)   | C(50)-C(51)-C(52) | 121.2(2)   |
| C(10)-C(11)-C(15) | 120.3(2)   | C(51)-C(52)-C(47) | 118.5(2)   |
| C(6)-C(11)-C(15)  | 120.96(19) | C(51)-C(52)-C(56) | 119.8(2)   |
| C(7)-C(12)-C(14)  | 111.8(2)   | C(47)-C(52)-C(56) | 121.8(2)   |
| C(7)-C(12)-C(13)  | 110.4(2)   | C(48)-C(53)-C(55) | 110.2(2)   |
| C(14)-C(12)-C(13) | 109.4(2)   | C(48)-C(53)-C(54) | 113.2(2)   |
| C(11)-C(15)-C(17) | 113.5(2)   | C(55)-C(53)-C(54) | 109.7(2)   |
| C(11)-C(15)-C(16) | 110.53(18) | C(57)-C(56)-C(52) | 111.4(2)   |



|                   |            |                   |          |
|-------------------|------------|-------------------|----------|
| C(17)-C(15)-C(16) | 109.5(2)   | C(57)-C(56)-C(58) | 110.4(2) |
| C(19)-C(18)-C(23) | 121.36(19) | C(52)-C(56)-C(58) | 113.2(2) |
| C(19)-C(18)-N(2)  | 119.84(19) |                   |          |

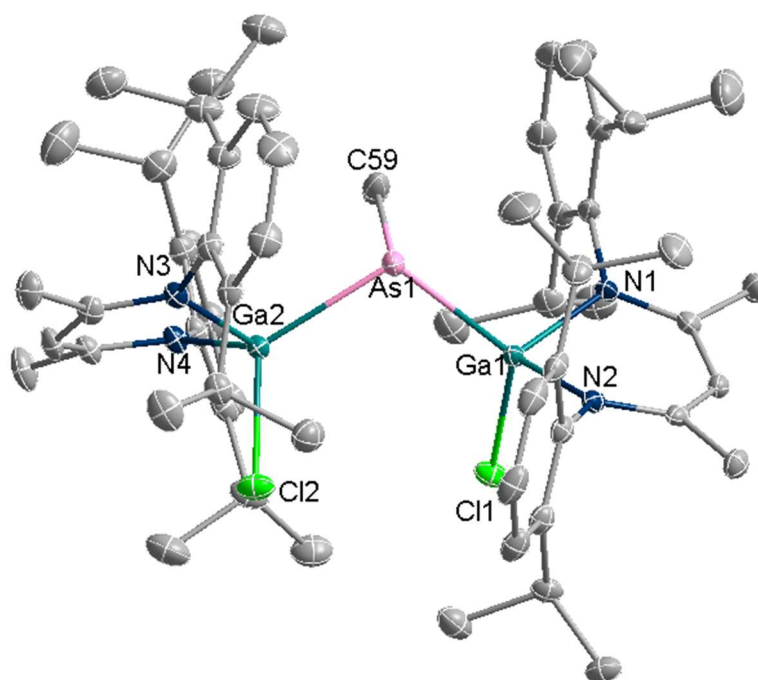

**Fig. S44.** Solid state structure of **9**. Hydrogen atoms are omitted for clarity. Displacement ellipsoids drawn at 50% probability levels.

**Table S18:** Bond lengths [Å] for **9** (jk\_347m).

|             |            |             |          |             |          |
|-------------|------------|-------------|----------|-------------|----------|
| As(1)-C(59) | 1.990(2)   | C(8)-C(9)   | 1.381(4) | C(35)-C(36) | 1.403(3) |
| As(1)-Ga(1) | 2.4044(4)  | C(9)-C(10)  | 1.373(4) | C(35)-C(40) | 1.408(3) |
| As(1)-Ga(2) | 2.4134(4)  | C(10)-C(11) | 1.401(3) | C(36)-C(37) | 1.397(3) |
| Ga(1)-N(1)  | 1.9702(16) | C(11)-C(15) | 1.517(3) | C(36)-C(41) | 1.513(3) |
| Ga(1)-N(2)  | 1.9726(16) | C(12)-C(13) | 1.531(3) | C(37)-C(38) | 1.380(3) |
| Ga(1)-Cl(1) | 2.2045(6)  | C(12)-C(14) | 1.534(3) | C(38)-C(39) | 1.374(3) |
| Ga(2)-N(4)  | 1.9668(16) | C(15)-C(16) | 1.526(4) | C(39)-C(40) | 1.387(3) |
| Ga(2)-N(3)  | 1.9726(16) | C(15)-C(17) | 1.531(3) | C(40)-C(44) | 1.519(3) |
| Ga(2)-Cl(2) | 2.2003(6)  | C(18)-C(19) | 1.404(3) | C(41)-C(42) | 1.528(3) |
| N(1)-C(1)   | 1.334(3)   | C(18)-C(23) | 1.404(3) | C(41)-C(43) | 1.532(3) |
| N(1)-C(6)   | 1.449(2)   | C(19)-C(20) | 1.398(3) | C(44)-C(45) | 1.530(3) |
| N(2)-C(3)   | 1.325(2)   | C(19)-C(24) | 1.521(3) | C(44)-C(46) | 1.531(3) |
| N(2)-C(18)  | 1.456(2)   | C(20)-C(21) | 1.382(3) | C(47)-C(48) | 1.402(3) |
| N(3)-C(30)  | 1.322(3)   | C(21)-C(22) | 1.379(3) | C(47)-C(52) | 1.412(3) |
| N(3)-C(35)  | 1.446(3)   | C(22)-C(23) | 1.397(3) | C(48)-C(49) | 1.396(3) |
| N(4)-C(32)  | 1.346(3)   | C(23)-C(27) | 1.519(3) | C(48)-C(53) | 1.532(3) |
| N(4)-C(47)  | 1.452(2)   | C(24)-C(26) | 1.526(3) | C(49)-C(50) | 1.377(3) |
| C(1)-C(2)   | 1.389(3)   | C(24)-C(25) | 1.538(3) | C(50)-C(51) | 1.376(3) |

|            |          |             |          |             |          |
|------------|----------|-------------|----------|-------------|----------|
| C(1)-C(4)  | 1.509(3) | C(27)-C(28) | 1.527(3) | C(51)-C(52) | 1.395(3) |
| C(2)-C(3)  | 1.407(3) | C(27)-C(29) | 1.532(3) | C(52)-C(56) | 1.519(3) |
| C(3)-C(5)  | 1.504(3) | C(30)-C(31) | 1.404(3) | C(53)-C(54) | 1.527(3) |
| C(6)-C(7)  | 1.401(3) | C(30)-C(33) | 1.510(3) | C(53)-C(55) | 1.534(3) |
| C(6)-C(11) | 1.406(3) | C(31)-C(32) | 1.388(3) | C(56)-C(57) | 1.536(3) |
| C(7)-C(8)  | 1.396(3) | C(32)-C(34) | 1.516(3) | C(56)-C(58) | 1.539(3) |
| C(7)-C(12) | 1.517(3) |             |          |             |          |

**Table S19:** Bond angles [°] for **9** (jk\_347m).

|                   |             |                   |            |
|-------------------|-------------|-------------------|------------|
| C(59)-As(1)-Ga(1) | 100.86(7)   | C(18)-C(19)-C(24) | 123.72(17) |
| C(59)-As(1)-Ga(2) | 97.46(7)    | C(21)-C(20)-C(19) | 121.3(2)   |
| Ga(1)-As(1)-Ga(2) | 108.431(12) | C(22)-C(21)-C(20) | 119.9(2)   |
| N(1)-Ga(1)-N(2)   | 95.20(7)    | C(21)-C(22)-C(23) | 121.4(2)   |
| N(1)-Ga(1)-Cl(1)  | 103.96(5)   | C(22)-C(23)-C(18) | 117.8(2)   |
| N(2)-Ga(1)-Cl(1)  | 102.44(5)   | C(22)-C(23)-C(27) | 120.40(19) |
| N(1)-Ga(1)-As(1)  | 113.17(5)   | C(18)-C(23)-C(27) | 121.78(19) |
| N(2)-Ga(1)-As(1)  | 116.73(5)   | C(19)-C(24)-C(26) | 110.74(18) |
| Cl(1)-Ga(1)-As(1) | 121.479(18) | C(19)-C(24)-C(25) | 112.40(17) |
| N(4)-Ga(2)-N(3)   | 95.16(7)    | C(26)-C(24)-C(25) | 109.05(17) |
| N(4)-Ga(2)-Cl(2)  | 104.33(5)   | C(23)-C(27)-C(28) | 111.33(19) |
| N(3)-Ga(2)-Cl(2)  | 101.17(5)   | C(23)-C(27)-C(29) | 112.5(2)   |
| N(4)-Ga(2)-As(1)  | 124.31(5)   | C(28)-C(27)-C(29) | 110.8(2)   |
| N(3)-Ga(2)-As(1)  | 106.23(5)   | N(3)-C(30)-C(31)  | 122.76(18) |
| Cl(2)-Ga(2)-As(1) | 120.195(19) | N(3)-C(30)-C(33)  | 120.10(18) |
| C(1)-N(1)-C(6)    | 118.32(16)  | C(31)-C(30)-C(33) | 117.14(18) |
| C(1)-N(1)-Ga(1)   | 118.88(13)  | C(32)-C(31)-C(30) | 128.15(19) |
| C(6)-N(1)-Ga(1)   | 122.76(13)  | N(4)-C(32)-C(31)  | 124.97(18) |
| C(3)-N(2)-C(18)   | 117.62(16)  | N(4)-C(32)-C(34)  | 119.30(18) |
| C(3)-N(2)-Ga(1)   | 118.82(13)  | C(31)-C(32)-C(34) | 115.73(18) |
| C(18)-N(2)-Ga(1)  | 123.15(12)  | C(36)-C(35)-C(40) | 121.76(19) |
| C(30)-N(3)-C(35)  | 120.00(17)  | C(36)-C(35)-N(3)  | 120.71(18) |
| C(30)-N(3)-Ga(2)  | 119.45(14)  | C(40)-C(35)-N(3)  | 117.50(18) |
| C(35)-N(3)-Ga(2)  | 120.37(13)  | C(37)-C(36)-C(35) | 117.5(2)   |
| C(32)-N(4)-C(47)  | 115.66(16)  | C(37)-C(36)-C(41) | 119.62(19) |
| C(32)-N(4)-Ga(2)  | 117.04(13)  | C(35)-C(36)-C(41) | 122.86(18) |
| C(47)-N(4)-Ga(2)  | 127.08(13)  | C(38)-C(37)-C(36) | 121.3(2)   |
| N(1)-C(1)-C(2)    | 123.47(18)  | C(39)-C(38)-C(37) | 120.1(2)   |
| N(1)-C(1)-C(4)    | 119.37(17)  | C(38)-C(39)-C(40) | 121.4(2)   |
| C(2)-C(1)-C(4)    | 117.14(18)  | C(39)-C(40)-C(35) | 117.9(2)   |
| C(1)-C(2)-C(3)    | 128.15(19)  | C(39)-C(40)-C(44) | 121.2(2)   |
| N(2)-C(3)-C(2)    | 124.25(18)  | C(35)-C(40)-C(44) | 120.92(19) |
| N(2)-C(3)-C(5)    | 119.83(17)  | C(36)-C(41)-C(42) | 110.56(17) |
| C(2)-C(3)-C(5)    | 115.91(17)  | C(36)-C(41)-C(43) | 111.86(18) |

|                   |            |                   |            |
|-------------------|------------|-------------------|------------|
| C(7)-C(6)-C(11)   | 121.83(19) | C(42)-C(41)-C(43) | 109.34(18) |
| C(7)-C(6)-N(1)    | 120.20(18) | C(40)-C(44)-C(45) | 112.42(18) |
| C(11)-C(6)-N(1)   | 117.95(19) | C(40)-C(44)-C(46) | 112.7(2)   |
| C(8)-C(7)-C(6)    | 117.8(2)   | C(45)-C(44)-C(46) | 110.9(2)   |
| C(8)-C(7)-C(12)   | 119.5(2)   | C(48)-C(47)-C(52) | 121.31(18) |
| C(6)-C(7)-C(12)   | 122.68(18) | C(48)-C(47)-N(4)  | 120.31(17) |
| C(9)-C(8)-C(7)    | 121.2(2)   | C(52)-C(47)-N(4)  | 118.17(18) |
| C(10)-C(9)-C(8)   | 120.2(2)   | C(49)-C(48)-C(47) | 117.67(19) |
| C(9)-C(10)-C(11)  | 121.2(2)   | C(49)-C(48)-C(53) | 119.9(2)   |
| C(10)-C(11)-C(6)  | 117.6(2)   | C(47)-C(48)-C(53) | 122.44(18) |
| C(10)-C(11)-C(15) | 119.9(2)   | C(50)-C(49)-C(48) | 121.8(2)   |
| C(6)-C(11)-C(15)  | 122.48(19) | C(51)-C(50)-C(49) | 119.7(2)   |
| C(7)-C(12)-C(13)  | 110.96(19) | C(50)-C(51)-C(52) | 121.5(2)   |
| C(7)-C(12)-C(14)  | 111.76(17) | C(51)-C(52)-C(47) | 117.7(2)   |
| C(13)-C(12)-C(14) | 110.08(19) | C(51)-C(52)-C(56) | 119.14(19) |
| C(11)-C(15)-C(16) | 112.7(2)   | C(47)-C(52)-C(56) | 123.10(18) |
| C(11)-C(15)-C(17) | 111.4(2)   | C(54)-C(53)-C(48) | 113.16(18) |
| C(16)-C(15)-C(17) | 110.0(2)   | C(54)-C(53)-C(55) | 109.08(19) |
| C(19)-C(18)-C(23) | 121.78(18) | C(48)-C(53)-C(55) | 113.1(2)   |
| C(19)-C(18)-N(2)  | 119.86(17) | C(52)-C(56)-C(57) | 111.94(19) |
| C(23)-C(18)-N(2)  | 118.33(17) | C(52)-C(56)-C(58) | 113.4(2)   |
| C(20)-C(19)-C(18) | 117.79(19) | C(57)-C(56)-C(58) | 108.3(2)   |
| C(20)-C(19)-C(24) | 118.49(18) |                   |            |

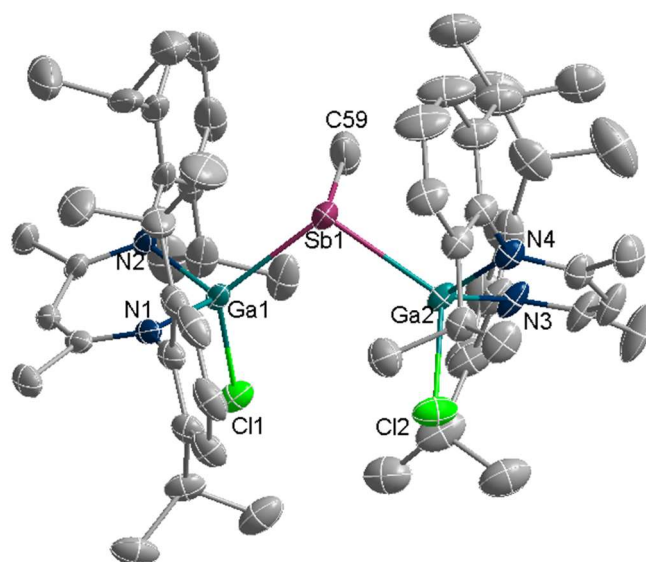

**Fig. S45.** Solid state structure of **10**. Hydrogen atoms are omitted for clarity. Displacement ellipsoids drawn at 50% probability levels.

**Table S20:** Bond lengths [Å] for **10** (jk\_312m).

|             |            |             |           |             |          |
|-------------|------------|-------------|-----------|-------------|----------|
| Sb(1)-C(59) | 2.129(7)   | C(8)-C(9)   | 1.378(7)  | C(35)-C(36) | 1.409(7) |
| Sb(1)-Ga(1) | 2.5837(7)  | C(9)-C(10)  | 1.373(8)  | C(35)-C(40) | 1.417(8) |
| Sb(1)-Ga(2) | 2.6045(6)  | C(10)-C(11) | 1.398(8)  | C(36)-C(37) | 1.403(6) |
| Ga(1)-N(2)  | 1.963(3)   | C(11)-C(15) | 1.527(7)  | C(36)-C(41) | 1.523(8) |
| Ga(1)-N(1)  | 1.975(3)   | C(12)-C(13) | 1.517(7)  | C(37)-C(38) | 1.376(8) |
| Ga(1)-Cl(1) | 2.2084(12) | C(12)-C(14) | 1.542(7)  | C(38)-C(39) | 1.372(8) |
| Ga(2)-N(3)  | 1.960(3)   | C(15)-C(17) | 1.527(8)  | C(39)-C(40) | 1.401(6) |
| Ga(2)-N(4)  | 1.975(4)   | C(15)-C(16) | 1.536(8)  | C(40)-C(44) | 1.600(8) |
| Ga(2)-Cl(2) | 2.2103(12) | C(18)-C(19) | 1.396(8)  | C(41)-C(43) | 1.512(9) |
| N(1)-C(1)   | 1.331(5)   | C(18)-C(23) | 1.409(8)  | C(41)-C(42) | 1.544(9) |
| N(1)-C(6)   | 1.445(5)   | C(19)-C(20) | 1.410(6)  | C(44)-C(46) | 1.488(9) |
| N(2)-C(3)   | 1.335(5)   | C(19)-C(24) | 1.511(9)  | C(44)-C(45) | 1.513(9) |
| N(2)-C(18)  | 1.449(5)   | C(20)-C(21) | 1.373(12) | C(47)-C(52) | 1.404(6) |
| N(3)-C(30)  | 1.341(6)   | C(21)-C(22) | 1.372(12) | C(47)-C(48) | 1.408(7) |
| N(3)-C(35)  | 1.454(5)   | C(22)-C(23) | 1.399(7)  | C(48)-C(49) | 1.394(8) |
| N(4)-C(32)  | 1.319(6)   | C(23)-C(27) | 1.514(10) | C(48)-C(53) | 1.526(7) |
| N(4)-C(47)  | 1.445(5)   | C(24)-C(26) | 1.533(7)  | C(49)-C(50) | 1.373(9) |
| C(1)-C(2)   | 1.408(6)   | C(24)-C(25) | 1.539(8)  | C(50)-C(51) | 1.378(8) |
| C(1)-C(4)   | 1.509(5)   | C(27)-C(29) | 1.529(10) | C(51)-C(52) | 1.397(6) |
| C(2)-C(3)   | 1.395(6)   | C(27)-C(28) | 1.532(9)  | C(52)-C(56) | 1.513(6) |
| C(3)-C(5)   | 1.507(6)   | C(30)-C(31) | 1.394(7)  | C(53)-C(54) | 1.525(9) |
| C(6)-C(7)   | 1.405(6)   | C(30)-C(33) | 1.519(6)  | C(53)-C(55) | 1.534(8) |
| C(6)-C(11)  | 1.413(6)   | C(31)-C(32) | 1.405(7)  | C(56)-C(58) | 1.520(7) |
| C(7)-C(8)   | 1.405(6)   | C(32)-C(34) | 1.505(6)  | C(56)-C(57) | 1.537(6) |
| C(7)-C(12)  | 1.517(6)   |             |           |             |          |

**Table S21:** Bond angles [°] for **10** (jk\_312m).

|                   |             |                   |          |
|-------------------|-------------|-------------------|----------|
| C(59)-Sb(1)-Ga(1) | 101.0(2)    | C(20)-C(19)-C(24) | 119.4(6) |
| C(59)-Sb(1)-Ga(2) | 97.95(18)   | C(21)-C(20)-C(19) | 121.1(7) |
| Ga(1)-Sb(1)-Ga(2) | 106.652(19) | C(22)-C(21)-C(20) | 120.5(5) |
| N(2)-Ga(1)-N(1)   | 95.42(14)   | C(21)-C(22)-C(23) | 121.4(7) |
| N(2)-Ga(1)-Cl(1)  | 103.69(13)  | C(22)-C(23)-C(18) | 117.4(7) |
| N(1)-Ga(1)-Cl(1)  | 102.24(10)  | C(22)-C(23)-C(27) | 120.1(6) |
| N(2)-Ga(1)-Sb(1)  | 112.33(11)  | C(18)-C(23)-C(27) | 122.4(4) |
| N(1)-Ga(1)-Sb(1)  | 117.55(11)  | C(19)-C(24)-C(26) | 110.8(5) |
| Cl(1)-Ga(1)-Sb(1) | 121.69(4)   | C(19)-C(24)-C(25) | 112.7(5) |
| N(3)-Ga(2)-N(4)   | 95.43(15)   | C(26)-C(24)-C(25) | 110.1(5) |
| N(3)-Ga(2)-Cl(2)  | 103.79(12)  | C(23)-C(27)-C(29) | 113.5(5) |
| N(4)-Ga(2)-Cl(2)  | 101.96(10)  | C(23)-C(27)-C(28) | 111.1(7) |
| N(3)-Ga(2)-Sb(1)  | 125.48(10)  | C(29)-C(27)-C(28) | 109.9(6) |
| N(4)-Ga(2)-Sb(1)  | 105.89(10)  | N(3)-C(30)-C(31)  | 124.9(4) |

|                   |           |                   |          |
|-------------------|-----------|-------------------|----------|
| Cl(2)-Ga(2)-Sb(1) | 119.19(4) | N(3)-C(30)-C(33)  | 119.2(4) |
| C(1)-N(1)-C(6)    | 118.6(3)  | C(31)-C(30)-C(33) | 115.9(4) |
| C(1)-N(1)-Ga(1)   | 118.3(3)  | C(30)-C(31)-C(32) | 128.2(4) |
| C(6)-N(1)-Ga(1)   | 122.6(3)  | N(4)-C(32)-C(31)  | 122.6(4) |
| C(3)-N(2)-C(18)   | 118.6(4)  | N(4)-C(32)-C(34)  | 120.0(4) |
| C(3)-N(2)-Ga(1)   | 119.2(3)  | C(31)-C(32)-C(34) | 117.5(4) |
| C(18)-N(2)-Ga(1)  | 122.1(3)  | C(36)-C(35)-C(40) | 121.7(4) |
| C(30)-N(3)-C(35)  | 116.6(3)  | C(36)-C(35)-N(3)  | 117.8(4) |
| C(30)-N(3)-Ga(2)  | 117.1(3)  | C(40)-C(35)-N(3)  | 120.4(4) |
| C(35)-N(3)-Ga(2)  | 126.1(3)  | C(37)-C(36)-C(35) | 117.2(5) |
| C(32)-N(4)-C(47)  | 120.7(4)  | C(37)-C(36)-C(41) | 119.5(5) |
| C(32)-N(4)-Ga(2)  | 119.4(3)  | C(35)-C(36)-C(41) | 123.3(4) |
| C(47)-N(4)-Ga(2)  | 119.7(3)  | C(38)-C(37)-C(36) | 121.5(5) |
| N(1)-C(1)-C(2)    | 124.4(4)  | C(39)-C(38)-C(37) | 120.4(4) |
| N(1)-C(1)-C(4)    | 119.8(4)  | C(38)-C(39)-C(40) | 121.4(5) |
| C(2)-C(1)-C(4)    | 115.8(4)  | C(39)-C(40)-C(35) | 117.3(5) |
| C(3)-C(2)-C(1)    | 128.4(4)  | C(39)-C(40)-C(44) | 117.9(5) |
| N(2)-C(3)-C(2)    | 122.8(4)  | C(35)-C(40)-C(44) | 124.7(4) |
| N(2)-C(3)-C(5)    | 120.0(4)  | C(43)-C(41)-C(36) | 112.9(5) |
| C(2)-C(3)-C(5)    | 117.2(4)  | C(43)-C(41)-C(42) | 108.1(6) |
| C(7)-C(6)-C(11)   | 121.3(4)  | C(36)-C(41)-C(42) | 112.9(6) |
| C(7)-C(6)-N(1)    | 120.0(4)  | C(46)-C(44)-C(45) | 111.5(5) |
| C(11)-C(6)-N(1)   | 118.8(4)  | C(46)-C(44)-C(40) | 114.7(4) |
| C(6)-C(7)-C(8)    | 118.0(4)  | C(45)-C(44)-C(40) | 108.9(6) |
| C(6)-C(7)-C(12)   | 123.3(4)  | C(52)-C(47)-C(48) | 121.9(4) |
| C(8)-C(7)-C(12)   | 118.7(4)  | C(52)-C(47)-N(4)  | 120.4(4) |
| C(9)-C(8)-C(7)    | 121.0(5)  | C(48)-C(47)-N(4)  | 117.6(4) |
| C(10)-C(9)-C(8)   | 120.4(5)  | C(49)-C(48)-C(47) | 118.0(5) |
| C(9)-C(10)-C(11)  | 121.3(5)  | C(49)-C(48)-C(53) | 120.6(5) |
| C(10)-C(11)-C(6)  | 117.9(5)  | C(47)-C(48)-C(53) | 121.3(4) |
| C(10)-C(11)-C(15) | 120.6(5)  | C(50)-C(49)-C(48) | 120.7(5) |
| C(6)-C(11)-C(15)  | 121.5(5)  | C(49)-C(50)-C(51) | 120.9(5) |
| C(7)-C(12)-C(13)  | 111.1(5)  | C(50)-C(51)-C(52) | 121.1(5) |
| C(7)-C(12)-C(14)  | 112.0(4)  | C(51)-C(52)-C(47) | 117.5(4) |
| C(13)-C(12)-C(14) | 109.5(4)  | C(51)-C(52)-C(56) | 119.7(4) |
| C(17)-C(15)-C(11) | 110.9(5)  | C(47)-C(52)-C(56) | 122.8(4) |
| C(17)-C(15)-C(16) | 110.7(5)  | C(54)-C(53)-C(48) | 112.5(5) |
| C(11)-C(15)-C(16) | 112.7(5)  | C(54)-C(53)-C(55) | 109.9(5) |
| C(19)-C(18)-C(23) | 122.2(4)  | C(48)-C(53)-C(55) | 113.1(5) |
| C(19)-C(18)-N(2)  | 119.8(5)  | C(52)-C(56)-C(58) | 110.8(4) |
| C(23)-C(18)-N(2)  | 118.0(5)  | C(52)-C(56)-C(57) | 111.3(4) |
| C(18)-C(19)-C(20) | 117.4(6)  | C(58)-C(56)-C(57) | 109.6(4) |
| C(18)-C(19)-C(24) | 123.2(4)  |                   |          |

### C) Computational methods

All quantum chemical calculations were employed with the ORCA quantum chemistry package (version 4.12).<sup>[10]</sup> Geometry optimizations of the anionic model systems were calculated with a PBE0 density functional, def2-TZVP<sup>[11]</sup> and atom-pairwise dispersion correction with Becke-Johnson damping Scheme (D3BJ).<sup>[12]</sup> The quantum chemical calculations of **1** and **2** were carried out without the counter cation IPrH<sup>+</sup> (**1'** and **2'**) and the ground-state geometry optimizations of **1'** and **2'** as well as **5-6** and **9-10** and LGaEGa(Cl)L (E = As **III**, Sb **IV**) were performed with a PBE0 density functional, def2-SVP basis sets for C, H and N atoms and def2-TZVP basis set for Cl, Ga, As and Sb atoms basis set and atom-pairwise dispersion correction with Becke-Johnson damping Scheme.<sup>[13]</sup> Additionally, effective core potentials (ECP) were employed for Sb atoms to accelerate geometry optimizations.<sup>[14]</sup> The RIJCOSX approximation was employed to accelerate the calculations in conjunction with the appropriate auxiliary basis sets.<sup>[15]</sup> Frequency calculations were carried out to determine the optimized structures as minima on the potential energy surface. Natural bond orbital analysis was performed using the NBO version 6.0.<sup>[16]</sup>

**Table S22.** Calculated bond lengths, Mayer bond order, natural charge (e) and Wiberg bond index of anionic model system [ER<sub>2</sub>]<sup>-</sup> (E = As, Sb; R = Me, NMe<sub>2</sub>, OMe, SiMe<sub>3</sub>, GaMe<sub>2</sub>) (PBE0-D3BJ/def2-TZVP).

|                                | [As(OMe) <sub>2</sub> ] <sup>-</sup>                | [Sb(OMe) <sub>2</sub> ] <sup>-</sup>                |
|--------------------------------|-----------------------------------------------------|-----------------------------------------------------|
| bond lengths E-O1/2            | 1.864                                               | 2.037                                               |
| Mayer bond order E-O1/2        | 0.83                                                | 0.73                                                |
| Wiberg bond index E-O1/2       | 0.63                                                | 0.55                                                |
| Mulliken atomic charge (E; O)  | -0.15; -0.45                                        | -0.06; -0.54                                        |
| Natural charge (E; O)          | 0.29; -0.80                                         | 0.37; -0.84                                         |
|                                | [As(NMe <sub>2</sub> ) <sub>2</sub> ] <sup>-</sup>  | [Sb(NMe <sub>2</sub> ) <sub>2</sub> ] <sup>-</sup>  |
| bond lengths E-N1/2            | 1.910                                               | 2.098                                               |
| Mayer bond order E-N1/2        | 0.95                                                | 0.86                                                |
| Wiberg bond index E-N1/2       | 0.72                                                | 0.64                                                |
| Mulliken atomic charge (E; N)  | -0.34; -0.26                                        | -0.26; -0.38                                        |
| Natural charge (E; N)          | 0.16; -0.71                                         | 0.23; -0.75                                         |
|                                | [As(CMe <sub>3</sub> ) <sub>2</sub> ] <sup>-</sup>  | [Sb(CMe <sub>3</sub> ) <sub>2</sub> ] <sup>-</sup>  |
| bond lengths E-C1/2            | 2.0089                                              | 2.212                                               |
| Mayer bond order E-C1/2        | 1.08                                                | 0.88                                                |
| Wiberg bond index As-C1/2      | 0.92                                                | 0.87                                                |
| Mulliken atomic charge (E; C)  | -0.42; -0.53                                        | -0.31; -0.62                                        |
| Natural charge (E; C)          | -0.19; -0.93                                        | -0.16; -0.98                                        |
|                                | [As(SiMe <sub>3</sub> ) <sub>2</sub> ] <sup>-</sup> | [Sb(SiMe <sub>3</sub> ) <sub>2</sub> ] <sup>-</sup> |
| bond lengths E-Si1/2           | 2.292                                               | 2.519                                               |
| Mayer bond order E-Si1/2       | 1.49                                                | 1.26                                                |
| Wiberg bond index E-Si1/2      | 1.15                                                | 1.10                                                |
| Mulliken atomic charge (E; Si) | -0.58; 0.22                                         | -0.47; 0.23                                         |
| Natural charge (E; Si)         | -0.86; 1.33                                         | -0.72; 1.25                                         |
|                                | [As(GaMe <sub>2</sub> ) <sub>2</sub> ] <sup>-</sup> | [Sb(GaMe <sub>2</sub> ) <sub>2</sub> ] <sup>-</sup> |
| bond lengths E-Ga1/2           | 2.330                                               | 2.528                                               |
| Mayer bond order E-Ga1/2       | 1.48                                                | 1.39                                                |
| Wiberg bond index E-Ga1/2      | 1.24                                                | 1.26                                                |
| Mulliken atomic charge (E; Ga) | -0.48; 0.25                                         | -0.52; 0.23                                         |
| Natural charge (E; Ga)         | -1.06; 1.19                                         | -0.89; 1.10                                         |

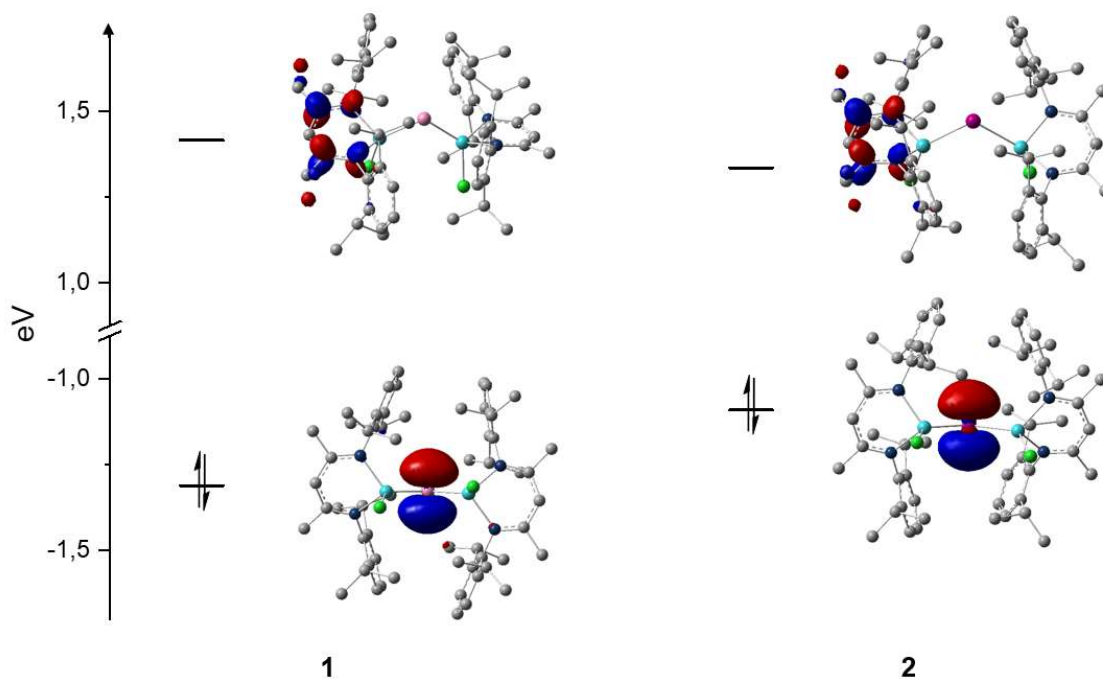

**Fig. S46.** Calculated HOMO's and LUMO's with their corresponding orbital energy in eV of **1'** (left) and **2'** (right) (PBE0-D3BJ/def2-TZVP).

**Table S23.** Mayer bond order of LGaEGa(Cl)L (E = As **III**, Sb **IV**), **1'**, **2'**, **5**, **6**, **9** and **10** (PBE0-D3BJ/def2-SVP; def2-TZVP E, Ga, Cl).

| X-Y         | <b>III'</b> | <b>IV'</b> | <b>1</b> | <b>2</b> | <b>5</b> | <b>6</b> | <b>9</b> | <b>10</b> |
|-------------|-------------|------------|----------|----------|----------|----------|----------|-----------|
| E-Ga(1)     | 1.65        | 1.62       | 1.28     | 1.22     | 0.97     | 0.95     | 0.95     | 0.94      |
| E-Ga(2)     | 1.09        | 1.06       | 1.30     | 1.23     | 0.97     | 0.96     | 0.95     | 0.95      |
| Ga(1)-Cl(1) | -           | -          | 0.78     | 0.78     | 0.90     | 0.89     | 0.86     | 0.85      |
| Ga(2)-Cl(1) | 0.81        | 0.81       | 0.78     | 0.78     | 0.90     | 0.89     | 0.87     | 0.87      |
| E-H         | -           | -          | -        | -        | 0.88     | 0.92     | -        | -         |
| E-C         | -           | -          | -        | -        | -        | -        | 1.08     | 1.10      |

**Table S24.** Wiberg bond index of LGaEGa(Cl)L (E = As **III**, Sb **IV**), **1'**, **2'**, **5**, **6**, **9** and **10** (PBE0-D3BJ/def2-SVP; def2-TZVP E, Ga, Cl).

| X-Y         | <b>III'</b> | <b>IV'</b> | <b>1</b> | <b>2</b> | <b>5</b> | <b>6</b> | <b>9</b> | <b>10</b> |
|-------------|-------------|------------|----------|----------|----------|----------|----------|-----------|
| E-Ga(1)     | 1.49        | 1.54       | 1.12     | 1.17     | 0.85     | 0.92     | 0.86     | 0.93      |
| E-Ga(2)     | 0.98        | 1.04       | 1.11     | 1.17     | 0.85     | 0.93     | 0.86     | 0.94      |
| Ga(1)-Cl(1) | -           | -          | 0.63     | 0.63     | 0.69     | 0.69     | 0.66     | 0.67      |
| Ga(2)-Cl(1) | 0.66        | 0.65       | 0.63     | 0.63     | 0.69     | 0.69     | 0.68     | 0.66      |
| E-H         | -           | -          | -        | -        | 0.95     | 0.94     | -        | -         |
| E-C         | -           | -          | -        | -        | -        | -        | 0.95     | 0.90      |

**Table S25.** Natural Charge of LGaEGa(Cl)L (E = As **III**, Sb **IV**), **1'**, **2'**, **5**, **6**, **9** and **10** (PBE0-D3BJ/def2-SVP; def2-TZVP E, Ga, Cl).

| X     | <b>III'</b> | <b>IV'</b> | <b>1</b> | <b>2</b> | <b>5</b> | <b>6</b> | <b>9</b> | <b>10</b> |
|-------|-------------|------------|----------|----------|----------|----------|----------|-----------|
| E     | -1.00       | -0.71      | -1.21    | -0.93    | -0.69    | -0.33    | -0.38    | -0.03     |
| Ga(1) | 1.27        | 1.12       | 1.29     | 1.17     | 1.40     | 1.28     | 1.39     | 1.26      |
| Ga(2) | 1.33        | 1.21       | 1.29     | 1.16     | 1.39     | 1.27     | 1.38     | 1.25      |
| Cl1   | -           | -          | -0.57    | -0.57    | -0.53    | -0.53    | -0.55    | -0.55     |
| Cl2   | -0.55       | -0.56      | -0.57    | -0.58    | -0.53    | -0.53    | -0.54    | -0.55     |
| H     | -           | -          | -        | -        | 0.04     | -0.07    | -        | -         |
| C     | -           | -          | -        | -        | -        | -        | -0.94    | -1.02     |

**Table S26.** Bond polarization P(X; Y) of LGaEGa(Cl)L (E = As **III**, Sb **IV**), **1'**, **2'**, **5**, **6**, **9** and **10** in % (PBE0-D3BJ/def2-SVP; def2-TZVP E, Ga, Cl).

| X-Y     | <b>III'</b>      | <b>IV'</b>       | <b>1</b> | <b>2</b> | <b>5</b> | <b>6</b> | <b>9</b> | <b>10</b> |
|---------|------------------|------------------|----------|----------|----------|----------|----------|-----------|
| E-Ga(1) | 63; 37<br>84; 16 | 55; 45<br>83; 17 | 69; 32   | 59; 41   | 71; 29   | 64; 36   | 70; 30   | 62; 38    |
| E-Ga(2) | 69; 31           | 61; 39           | 69; 31   | 59; 41   | 71; 29   | 64; 37   | 69; 31   | 62; 38    |
| E-H     | -                | -                | -        | -        | 51; 49   | 46; 54   | -        | -         |
| E-C     | -                | -                | -        | -        | -        | -        | 39; 61   | 35; 65    |



**Table S27.** Cartesian coordinates (x,y,z) for the optimized geometry of **1'**.

|    |          |          |          |   |          |          |          |
|----|----------|----------|----------|---|----------|----------|----------|
| As | 5,23323  | 10,22928 | 14,48519 | C | 6,36326  | 10,57134 | 18,04366 |
| Ga | 5,00833  | 7,92103  | 14,4338  | H | 7,4441   | 10,64282 | 18,24857 |
| Ga | 4,45483  | 11,07741 | 12,47432 | H | 5,85845  | 11,32198 | 18,67243 |
| Cl | 3,69071  | 6,60802  | 13,15898 | H | 6,18511  | 10,83147 | 16,98946 |
| Cl | 3,97972  | 10,0473  | 10,52602 | C | 2,76804  | 13,43895 | 11,90011 |
| N  | 6,66017  | 6,74122  | 14,37855 | C | 3,821    | 13,96125 | 11,12738 |
| N  | 4,59478  | 7,35011  | 16,34753 | H | 3,57461  | 14,8316  | 10,52178 |
| N  | 2,85414  | 12,33784 | 12,63349 | C | 5,18162  | 13,61864 | 11,17015 |
| N  | 5,66655  | 12,57724 | 11,83647 | C | 1,48521  | 14,22839 | 11,89396 |
| C  | 6,75005  | 5,64121  | 15,11239 | H | 1,58967  | 15,14017 | 11,29391 |
| C  | 5,88209  | 5,32059  | 16,17174 | H | 1,18914  | 14,5017  | 12,91718 |
| H  | 6,05856  | 4,35847  | 16,64977 | H | 0,66345  | 13,62471 | 11,48637 |
| C  | 4,95845  | 6,16202  | 16,81172 | C | 6,12906  | 14,54569 | 10,45164 |
| C  | 7,8757   | 4,67314  | 14,86413 | H | 6,78042  | 13,98274 | 9,76997  |
| H  | 7,77357  | 4,21122  | 13,87292 | H | 6,79786  | 15,04861 | 11,16627 |
| H  | 7,88682  | 3,88048  | 15,62175 | H | 5,57604  | 15,3048  | 9,88483  |
| H  | 8,84399  | 5,19523  | 14,87186 | C | 1,77038  | 12,00294 | 13,50083 |
| C  | 4,40395  | 5,68314  | 18,12768 | C | 0,63408  | 11,32524 | 13,00291 |
| H  | 3,30557  | 5,72235  | 18,12879 | C | -0,42348 | 11,05505 | 13,87646 |
| H  | 4,73647  | 6,34311  | 18,94151 | H | -1,29855 | 10,52261 | 13,49588 |
| H  | 4,73386  | 4,66021  | 18,34739 | C | -0,37364 | 11,42521 | 15,21288 |
| C  | 7,71654  | 7,06635  | 13,47902 | H | -1,20806 | 11,19936 | 15,88158 |
| C  | 7,82257  | 6,46076  | 12,20718 | C | 0,75789  | 12,06625 | 15,6978  |
| C  | 8,92559  | 6,78803  | 11,40974 | H | 0,81166  | 12,33982 | 16,75372 |
| H  | 9,02152  | 6,32834  | 10,42298 | C | 1,83733  | 12,37161 | 14,8646  |
| C  | 9,87849  | 7,70579  | 11,82895 | C | 0,51046  | 10,85883 | 11,56465 |
| H  | 10,71935 | 7,96259  | 11,17911 | H | 1,3521   | 11,27858 | 10,99329 |
| C  | 9,73343  | 8,33287  | 13,06142 | C | -0,79921 | 11,32632 | 10,9253  |
| H  | 10,45884 | 9,08845  | 13,36579 | H | -0,9416  | 12,41534 | 11,01078 |
| C  | 8,66465  | 8,0257   | 13,90686 | H | -1,66911 | 10,84334 | 11,39825 |
| C  | 6,77463  | 5,51167  | 11,65002 | H | -0,82327 | 11,06045 | 9,85652  |
| H  | 6,04902  | 5,30454  | 12,45021 | C | 0,62186  | 9,33732  | 11,47711 |
| C  | 7,37432  | 4,1867   | 11,1704  | H | 0,51099  | 9,00294  | 10,43349 |
| H  | 6,57988  | 3,51621  | 10,80641 | H | -0,164   | 8,85158  | 12,07717 |
| H  | 7,92546  | 3,65961  | 11,96477 | H | 1,59611  | 8,98136  | 11,83855 |
| H  | 8,0767   | 4,33837  | 10,33487 | C | 3,00965  | 13,13888 | 15,44689 |
| C  | 5,99782  | 6,1724   | 10,50954 | H | 3,83247  | 13,07084 | 14,71977 |
| H  | 6,65734  | 6,36028  | 9,64648  | C | 2,65079  | 14,61445 | 15,64144 |
| H  | 5,55075  | 7,12742  | 10,81973 | H | 2,34167  | 15,09621 | 14,70145 |
| H  | 5,17653  | 5,51887  | 10,17663 | H | 3,50912  | 15,17546 | 16,04555 |
| C  | 8,52597  | 8,69591  | 15,26076 | H | 1,81876  | 14,72276 | 16,35703 |
| H  | 7,44531  | 8,84155  | 15,4189  | C | 3,49939  | 12,52469 | 16,75265 |
| C  | 9,05764  | 7,82684  | 16,40136 | H | 3,73901  | 11,46301 | 16,60343 |

|   |          |          |          |   |          |          |          |
|---|----------|----------|----------|---|----------|----------|----------|
| H | 8,485    | 6,89536  | 16,51402 | H | 2,75291  | 12,61072 | 17,55865 |
| H | 8,98311  | 8,37312  | 17,35572 | H | 4,41445  | 13,03111 | 17,09781 |
| H | 10,11728 | 7,56122  | 16,24553 | C | 7,0805   | 12,5069  | 12,01009 |
| C | 9,13908  | 10,0865  | 15,29626 | C | 7,89256  | 11,89228 | 11,03462 |
| H | 10,23961 | 10,07164 | 15,22519 | C | 9,28231  | 11,95037 | 11,19002 |
| H | 8,88204  | 10,57732 | 16,24671 | H | 9,92144  | 11,47622 | 10,43986 |
| H | 8,74085  | 10,70452 | 14,47957 | C | 9,85777  | 12,59189 | 12,27974 |
| C | 3,77427  | 8,18833  | 17,16133 | H | 10,94509 | 12,64013 | 12,3847  |
| C | 2,37259  | 8,14906  | 17,0008  | C | 9,04337  | 13,14546 | 13,26275 |
| C | 1,57624  | 8,98343  | 17,78936 | H | 9,50213  | 13,60593 | 14,13971 |
| H | 0,49287  | 8,97102  | 17,64444 | C | 7,65106  | 13,09913 | 13,16111 |
| C | 2,1337   | 9,82593  | 18,74146 | C | 7,29198  | 11,13318 | 9,86807  |
| H | 1,49655  | 10,47444 | 19,34802 | H | 6,20223  | 11,2631  | 9,91671  |
| C | 3,51288  | 9,84968  | 18,90017 | C | 7,75644  | 11,62487 | 8,49818  |
| H | 3,95833  | 10,52608 | 19,63415 | H | 7,26509  | 11,03831 | 7,70636  |
| C | 4,35394  | 9,05339  | 18,11775 | H | 8,84559  | 11,50778 | 8,36704  |
| C | 1,70682  | 7,23278  | 15,99651 | H | 7,50591  | 12,68355 | 8,32617  |
| H | 2,49018  | 6,64048  | 15,50554 | C | 7,56719  | 9,63841  | 10,0176  |
| C | 0,74259  | 6,2556   | 16,66879 | H | 6,95522  | 9,06042  | 9,30912  |
| H | 0,29082  | 5,58497  | 15,92045 | H | 7,32448  | 9,2863   | 11,03041 |
| H | -0,07672 | 6,78281  | 17,18449 | H | 8,62739  | 9,40585  | 9,82541  |
| H | 1,25471  | 5,62924  | 17,41635 | C | 6,77597  | 13,6461  | 14,27463 |
| C | 1,01037  | 8,03925  | 14,90588 | H | 5,87571  | 13,01142 | 14,28151 |
| H | 1,7015   | 8,76302  | 14,44999 | C | 6,33495  | 15,09157 | 14,03944 |
| H | 0,15507  | 8,60493  | 15,3062  | H | 5,71422  | 15,19882 | 13,13955 |
| H | 0,64834  | 7,37336  | 14,10847 | H | 7,20877  | 15,75803 | 13,94432 |
| C | 5,85055  | 9,16241  | 18,34556 | H | 5,73232  | 15,44627 | 14,88989 |
| H | 6,34434  | 8,47049  | 17,64757 | C | 7,41679  | 13,51249 | 15,65235 |
| C | 6,22742  | 8,7635   | 19,77438 | H | 7,78051  | 12,4914  | 15,82587 |
| H | 5,89825  | 7,74328  | 20,02576 | H | 6,67412  | 13,7432  | 16,43095 |
| H | 5,7665   | 9,44523  | 20,50676 | H | 8,25924  | 14,21053 | 15,78988 |
| H | 7,31885  | 8,8199   | 19,91596 |   |          |          |          |

**Table S28.** Cartesian coordinates (x,y,z) for the optimized geometry of **2<sup>+</sup>**.

|    |          |         |          |   |          |          |          |
|----|----------|---------|----------|---|----------|----------|----------|
| Sb | 0,69145  | 4,34393 | 14,60856 | C | 0,55077  | -1,63867 | 13,80965 |
| Ga | 1,13915  | 3,72109 | 12,20478 | H | -0,52025 | -1,88816 | 13,87848 |
| Ga | 2,09981  | 6,31232 | 15,37077 | H | 1,06449  | -2,20573 | 14,60177 |
| Cl | 2,18834  | 4,72691 | 10,47436 | H | 0,93148  | -2,0077  | 12,84465 |
| Cl | 2,929    | 8,10895 | 14,28183 | C | 3,67609  | 7,08643  | 17,74341 |
| N  | -0,59394 | 3,31307 | 11,22638 | C | 2,66395  | 8,01351  | 18,06501 |
| N  | 1,77387  | 1,80126 | 11,98976 | H | 2,91013  | 8,72968  | 18,84795 |
| N  | 3,61344  | 6,21508 | 16,74513 | C | 1,3282   | 8,02234  | 17,63407 |
| N  | 0,85738  | 7,20327 | 16,70454 | C | 4,8946   | 7,10963  | 18,62994 |
| C  | -0,62641 | 2,40663 | 10,26271 | H | 5,21104  | 6,09103  | 18,89604 |
| C  | 0,39908  | 1,46905 | 10,033   | H | 4,69464  | 7,67849  | 19,5461  |

|   |          |          |          |   |          |         |          |
|---|----------|----------|----------|---|----------|---------|----------|
| H | 0,27607  | 0,83732  | 9,15444  | H | 5,74171  | 7,57654 | 18,10865 |
| C | 1,45302  | 1,12125  | 10,89341 | C | 0,3895   | 8,9884  | 18,30741 |
| C | -1,84254 | 2,31441  | 9,38054  | H | 0,92866  | 9,63502 | 19,01105 |
| H | -2,7437  | 2,15827  | 9,99204  | H | -0,40521 | 8,45292 | 18,84678 |
| H | -1,74742 | 1,48988  | 8,66362  | H | -0,1156  | 9,61239 | 17,55692 |
| H | -1,99844 | 3,25133  | 8,82879  | C | 4,66472  | 5,27125 | 16,55502 |
| C | 2,21907  | -0,13052 | 10,55636 | C | 5,90166  | 5,64917 | 15,98421 |
| H | 2,00794  | -0,92046 | 11,29168 | C | 6,89269  | 4,67257 | 15,83473 |
| H | 3,30191  | 0,0574   | 10,59851 | H | 7,84825  | 4,95667 | 15,3867  |
| H | 1,95107  | -0,50267 | 9,55967  | C | 6,68077  | 3,35582 | 16,21717 |
| C | -1,74324 | 4,10085  | 11,51609 | H | 7,46837  | 2,60986 | 16,08346 |
| C | -2,02935 | 5,27216  | 10,78105 | C | 5,45292  | 2,99057 | 16,75589 |
| C | -3,15049 | 6,02646  | 11,14679 | H | 5,27244  | 1,95293 | 17,04011 |
| H | -3,37776 | 6,94063  | 10,59208 | C | 4,43522  | 3,92835 | 16,93631 |
| C | -3,96383 | 5,6483   | 12,20585 | C | 6,21144  | 7,05435 | 15,50025 |
| H | -4,82391 | 6,26089  | 12,48865 | H | 5,39092  | 7,71616 | 15,81439 |
| C | -3,66135 | 4,49948  | 12,92889 | C | 6,25601  | 7,1017  | 13,97386 |
| H | -4,28478 | 4,22793  | 13,78126 | H | 5,28557  | 6,82436 | 13,54417 |
| C | -2,55504 | 3,71056  | 12,60835 | H | 7,02178  | 6,41384 | 13,58053 |
| C | -1,15426 | 5,77226  | 9,64381  | H | 6,4964   | 8,11861 | 13,62515 |
| H | -0,38601 | 5,01002  | 9,44716  | C | 7,52728  | 7,58153 | 16,07895 |
| C | -1,94691 | 6,00987  | 8,35608  | H | 7,57259  | 7,49228 | 17,17567 |
| H | -2,7176  | 6,78522  | 8,49357  | H | 7,66719  | 8,64165 | 15,81428 |
| H | -2,4585  | 5,10089  | 8,00074  | H | 8,3892   | 7,02921 | 15,67158 |
| H | -1,276   | 6,35842  | 7,55494  | C | 3,13666  | 3,51648 | 17,59615 |
| C | -0,41369 | 7,05154  | 10,0356  | H | 2,35948  | 4,19326 | 17,21135 |
| H | 0,16147  | 6,91349  | 10,95945 | C | 2,70033  | 2,10775 | 17,22523 |
| H | -1,11863 | 7,88523  | 10,18639 | H | 1,68556  | 1,91523 | 17,60401 |
| H | 0,29583  | 7,34069  | 9,24518  | H | 3,36501  | 1,33579 | 17,64713 |
| C | -2,21406 | 2,48531  | 13,44052 | H | 2,66967  | 1,99254 | 16,13399 |
| H | -1,11457 | 2,46957  | 13,51955 | C | 3,21865  | 3,69445 | 19,11111 |
| C | -2,63177 | 1,16553  | 12,78902 | H | 4,02995  | 3,07876 | 19,53308 |
| H | -2,39991 | 0,32637  | 13,46434 | H | 2,27637  | 3,38059 | 19,58844 |
| H | -2,09889 | 0,98102  | 11,8458  | H | 3,40667  | 4,74068 | 19,39349 |
| H | -3,71585 | 1,14328  | 12,5879  | C | -0,54879 | 7,05001 | 16,53727 |
| C | -2,75115 | 2,57182  | 14,86302 | C | -1,25612 | 7,84668 | 15,61546 |
| H | -2,49828 | 3,54229  | 15,31341 | C | -2,62357 | 7,61211 | 15,44162 |
| H | -2,29523 | 1,78655  | 15,482   | H | -3,17557 | 8,20507 | 14,70752 |
| H | -3,84432 | 2,43001  | 14,90531 | C | -3,27893 | 6,61269 | 16,14689 |
| C | 2,68253  | 1,22307  | 12,92576 | H | -4,33979 | 6,4174  | 15,96764 |
| C | 4,04023  | 1,61369  | 12,93529 | C | -2,56848 | 5,82625 | 17,04791 |
| C | 4,90818  | 1,01894  | 13,85569 | H | -3,08221 | 5,02137 | 17,57676 |
| H | 5,9518   | 1,34063  | 13,8797  | C | -1,20181 | 6,01946 | 17,25437 |
| C | 4,47346  | 0,03989  | 14,73794 | C | -0,55422 | 8,8651  | 14,73973 |
| H | 5,17051  | -0,41585 | 15,44588 | H | 0,50936  | 8,86292 | 15,01606 |
| C | 3,13573  | -0,33103 | 14,72979 | C | -0,62921 | 8,4453  | 13,27437 |

|   |          |          |          |   |          |          |          |
|---|----------|----------|----------|---|----------|----------|----------|
| H | 2,77958  | -1,07614 | 15,44582 | H | -1,65114 | 8,56206  | 12,87609 |
| C | 2,22116  | 0,25926  | 13,85349 | H | -0,33676 | 7,39068  | 13,15959 |
| C | 4,58693  | 2,66589  | 11,99448 | H | 0,05061  | 9,05654  | 12,66196 |
| H | 3,80466  | 2,90698  | 11,26233 | C | -1,07132 | 10,28971 | 14,92198 |
| C | 4,9125   | 3,95294  | 12,75242 | H | -0,94889 | 10,64617 | 15,95688 |
| H | 5,70069  | 3,79093  | 13,50376 | H | -2,13889 | 10,37384 | 14,65626 |
| H | 4,02643  | 4,33738  | 13,28098 | H | -0,51506 | 10,97901 | 14,26839 |
| H | 5,25308  | 4,73185  | 12,05404 | C | -0,42779 | 5,10215  | 18,18471 |
| C | 5,80193  | 2,16833  | 11,21165 | H | 0,58708  | 5,03157  | 17,76357 |
| H | 6,6538   | 1,94711  | 11,87447 | C | -0,98934 | 3,68455  | 18,23403 |
| H | 6,13215  | 2,93684  | 10,49555 | H | -1,9498  | 3,63172  | 18,77336 |
| H | 5,57376  | 1,25284  | 10,64278 | H | -0,28696 | 3,02392  | 18,76526 |
| C | 0,76217  | -0,1352  | 13,98091 | H | -1,1318  | 3,2796   | 17,22192 |
| H | 0,20369  | 0,38656  | 13,19064 | C | -0,29505 | 5,67403  | 19,59794 |
| C | 0,20373  | 0,32291  | 15,32971 | H | 0,21355  | 4,95282  | 20,25698 |
| H | 0,28208  | 1,41646  | 15,43568 | H | -1,28558 | 5,89148  | 20,0311  |
| H | 0,75914  | -0,13839 | 16,16153 | H | 0,29655  | 6,59866  | 19,61527 |
| H | -0,85321 | 0,02845  | 15,43212 |   |          |          |          |

**Table S29.** Cartesian coordinates (x,y,z) for the optimized geometry of **5**.

|    |          |          |          |   |          |          |          |
|----|----------|----------|----------|---|----------|----------|----------|
| As | 2,30322  | 15,99906 | 5,09862  | H | 7,66114  | 16,40607 | 6,58695  |
| H  | 2,56577  | 15,18711 | 3,83353  | C | 5,92437  | 17,3264  | 4,71657  |
| Ga | 2,84227  | 14,03226 | 6,3852   | H | 4,93651  | 17,50148 | 4,26649  |
| Ga | -0,06534 | 15,96539 | 4,67873  | H | 6,69554  | 17,58189 | 3,97302  |
| Cl | 1,63802  | 12,18758 | 6,37285  | H | 6,04322  | 18,02682 | 5,55731  |
| Cl | -1,42458 | 14,61674 | 5,76746  | C | -1,64179 | 16,36545 | 2,31649  |
| N  | 3,31169  | 14,27392 | 8,2787   | C | -2,3565  | 17,34788 | 3,0216   |
| N  | 4,63837  | 13,45832 | 5,80059  | H | -3,26624 | 17,70346 | 2,54139  |
| N  | -0,54599 | 15,76657 | 2,77948  | C | -1,9605  | 18,0536  | 4,16723  |
| N  | -0,88884 | 17,74211 | 4,8943   | C | -2,15443 | 16,00673 | 0,95009  |
| C  | 4,3232   | 13,57903 | 8,79859  | H | -1,34244 | 16,00395 | 0,20948  |
| C  | 5,23178  | 12,8169  | 8,04506  | H | -2,9367  | 16,70449 | 0,63048  |
| H  | 5,95989  | 12,25073 | 8,6234   | H | -2,57371 | 14,99045 | 0,95838  |
| C  | 5,43635  | 12,82624 | 6,65731  | C | -2,8015  | 19,23138 | 4,56931  |
| C  | 4,54401  | 13,61009 | 10,28515 | H | -2,18418 | 20,11183 | 4,79276  |
| H  | 5,50602  | 13,15502 | 10,54712 | H | -3,34667 | 18,99005 | 5,49437  |
| H  | 3,74337  | 13,06129 | 10,80068 | H | -3,52968 | 19,48396 | 3,79016  |
| H  | 4,51099  | 14,63907 | 10,66888 | C | 0,19043  | 14,89425 | 1,92009  |
| C  | 6,63247  | 12,0812  | 6,13552  | C | -0,23232 | 13,56351 | 1,72139  |
| H  | 7,14292  | 12,63683 | 5,33799  | C | 0,48455  | 12,77335 | 0,81734  |
| H  | 6,29764  | 11,12923 | 5,69443  | H | 0,1673   | 11,74197 | 0,64665  |
| H  | 7,3431   | 11,85791 | 6,93971  | C | 1,59908  | 13,26513 | 0,15234  |
| C  | 2,5455   | 15,11698 | 9,14391  | H | 2,14688  | 12,62749 | -0,54607 |
| C  | 1,5356   | 14,57248 | 9,96682  | C | 2,03139  | 14,56395 | 0,39521  |
| C  | 0,91429  | 15,41844 | 10,8901  | H | 2,92415  | 14,9351  | -0,10997 |

|   |          |          |          |   |          |          |          |
|---|----------|----------|----------|---|----------|----------|----------|
| H | 0,13926  | 15,01224 | 11,54419 | C | 1,34007  | 15,40212 | 1,27353  |
| C | 1,2489   | 16,76351 | 10,98078 | C | -1,40416 | 12,95565 | 2,46881  |
| H | 0,75153  | 17,40447 | 11,71283 | H | -1,91387 | 13,76214 | 3,01656  |
| C | 2,19479  | 17,29877 | 10,11523 | C | -2,41784 | 12,29533 | 1,53381  |
| H | 2,42815  | 18,36397 | 10,16349 | H | -1,99624 | 11,40195 | 1,04673  |
| C | 2,85948  | 16,49223 | 9,18728  | H | -2,75899 | 12,9712  | 0,73478  |
| C | 1,08281  | 13,12837 | 9,86268  | H | -3,30172 | 11,96853 | 2,10237  |
| H | 1,78212  | 12,59976 | 9,19811  | C | -0,91288 | 11,95236 | 3,5116   |
| C | 1,07073  | 12,41054 | 11,21229 | H | -0,2103  | 12,4085  | 4,22111  |
| H | 0,82761  | 11,3461  | 11,0729  | H | -0,40818 | 11,09944 | 3,03046  |
| H | 0,31194  | 12,83155 | 11,8905  | H | -1,76055 | 11,5634  | 4,0959   |
| H | 2,04048  | 12,46998 | 11,72958 | C | 1,79713  | 16,83272 | 1,49353  |
| C | -0,29865 | 13,05214 | 9,20982  | H | 1,53777  | 17,09115 | 2,53257  |
| H | -0,60189 | 12,00212 | 9,07946  | C | 1,05069  | 17,81399 | 0,58833  |
| H | -0,30958 | 13,52349 | 8,21794  | H | 1,19218  | 17,55419 | -0,47306 |
| H | -1,05545 | 13,5525  | 9,83558  | H | 1,42859  | 18,8375  | 0,73808  |
| C | 3,92665  | 17,0845  | 8,28842  | H | -0,02809 | 17,83031 | 0,7962   |
| H | 4,01488  | 16,42045 | 7,41607  | C | 3,30471  | 17,00652 | 1,3533   |
| C | 5,29287  | 17,1106  | 8,97468  | H | 3,63707  | 16,89468 | 0,30892  |
| H | 6,04716  | 17,56547 | 8,31318  | H | 3,85615  | 16,27893 | 1,96514  |
| H | 5,64341  | 16,09959 | 9,22893  | H | 3,60053  | 18,01495 | 1,67849  |
| H | 5,25655  | 17,70282 | 9,90324  | C | -0,41407 | 18,66482 | 5,8762   |
| C | 3,54071  | 18,45923 | 7,75798  | C | -0,91069 | 18,63127 | 7,19472  |
| H | 2,54005  | 18,44509 | 7,30531  | C | -0,42524 | 19,57162 | 8,11015  |
| H | 4,25362  | 18,78242 | 6,98492  | H | -0,79447 | 19,55091 | 9,13813  |
| H | 3,54161  | 19,22813 | 8,54686  | C | 0,50411  | 20,53249 | 7,734    |
| C | 5,05687  | 13,66337 | 4,45084  | H | 0,86169  | 21,26527 | 8,46119  |
| C | 4,78037  | 12,70448 | 3,45723  | C | 0,98649  | 20,55173 | 6,4298   |
| C | 5,19559  | 12,96757 | 2,14708  | H | 1,72471  | 21,30275 | 6,14079  |
| H | 4,97859  | 12,23707 | 1,36418  | C | 0,55411  | 19,61723 | 5,48575  |
| C | 5,87847  | 14,13275 | 1,8275   | C | -1,94071 | 17,61572 | 7,64386  |
| H | 6,19925  | 14,3168  | 0,79932  | H | -2,25805 | 17,04465 | 6,75988  |
| C | 6,14629  | 15,07018 | 2,82026  | C | -3,17887 | 18,27208 | 8,25535  |
| H | 6,67909  | 15,98725 | 2,56209  | H | -3,63341 | 19,01653 | 7,58393  |
| C | 5,73658  | 14,86338 | 4,13916  | H | -2,93949 | 18,78662 | 9,19937  |
| C | 4,04629  | 11,41496 | 3,75922  | H | -3,93956 | 17,50929 | 8,48211  |
| H | 3,86588  | 11,37577 | 4,84314  | C | -1,32336 | 16,62486 | 8,6259   |
| C | 4,85929  | 10,18174 | 3,3641   | H | -0,40964 | 16,16625 | 8,2229   |
| H | 4,99657  | 10,12203 | 2,27278  | H | -2,02859 | 15,81218 | 8,85467  |
| H | 4,33868  | 9,26465  | 3,68072  | H | -1,05381 | 17,12234 | 9,56879  |
| H | 5,86036  | 10,17971 | 3,82058  | C | 1,08972  | 19,66541 | 4,06756  |
| C | 2,68365  | 11,40075 | 3,07418  | H | 0,86297  | 18,69201 | 3,60834  |
| H | 2,79111  | 11,35848 | 1,97972  | C | 0,37788  | 20,7353  | 3,23786  |
| H | 2,10214  | 12,30078 | 3,31373  | H | 0,77868  | 20,7617  | 2,21278  |
| H | 2,09622  | 10,52841 | 3,39805  | H | 0,51667  | 21,73443 | 3,6814   |
| C | 6,0566   | 15,88957 | 5,21044  | H | -0,70241 | 20,54591 | 3,16581  |

|   |         |          |         |   |         |          |         |
|---|---------|----------|---------|---|---------|----------|---------|
| H | 5,31917 | 15,74953 | 6,0154  | C | 2,60318 | 19,84955 | 4,02013 |
| C | 7,44185 | 15,6514  | 5,81558 | H | 2,95948 | 19,7914  | 2,98043 |
| H | 8,22336 | 15,7179  | 5,04126 | H | 3,11215 | 19,06639 | 4,60018 |
| H | 7,52042 | 14,66351 | 6,28957 | H | 2,91531 | 20,83019 | 4,41215 |

**Table S30.** Cartesian coordinates (x,y,z) for the optimized geometry of **6**.

|    |          |          |          |   |          |          |          |
|----|----------|----------|----------|---|----------|----------|----------|
| Sb | 8,70709  | 15,96944 | 5,04287  | H | 11,61017 | 17,312   | 10,13538 |
| H  | 8,94851  | 15,00265 | 3,65438  | C | 9,9628   | 18,22397 | 7,99156  |
| Ga | 9,19546  | 13,84391 | 6,45382  | H | 8,96629  | 18,26952 | 7,52979  |
| Ga | 6,14947  | 15,87981 | 4,63822  | H | 10,69546 | 18,5508  | 7,23894  |
| Cl | 7,9782   | 12,00619 | 6,36214  | H | 9,98574  | 18,95888 | 8,81179  |
| Cl | 4,81639  | 14,53447 | 5,77     | C | 4,48988  | 16,2704  | 2,33587  |
| N  | 11,00113 | 13,26779 | 5,89675  | C | 3,80163  | 17,25594 | 3,06345  |
| N  | 9,62969  | 14,01262 | 8,36346  | H | 2,87246  | 17,60606 | 2,61725  |
| N  | 5,60587  | 15,67516 | 2,75551  | C | 4,23576  | 17,96666 | 4,19358  |
| N  | 5,33421  | 17,65857 | 4,87767  | C | 3,92303  | 15,90071 | 0,99374  |
| C  | 11,7454  | 12,55524 | 6,7356   | H | 4,7009   | 15,91945 | 0,21733  |
| C  | 11,4968  | 12,4878  | 8,1156   | H | 3,11061  | 16,57961 | 0,71079  |
| H  | 12,18053 | 11,86192 | 8,68706  | H | 3,53149  | 14,87361 | 1,0179   |
| C  | 10,59945 | 13,2559  | 8,87816  | C | 3,3973   | 19,13254 | 4,63336  |
| C  | 12,91362 | 11,77535 | 6,20261  | H | 2,71703  | 19,45683 | 3,83732  |
| H  | 13,40971 | 12,29841 | 5,37479  | H | 4,01529  | 19,97985 | 4,95807  |
| H  | 12,54312 | 10,81797 | 5,80155  | H | 2,79316  | 18,82877 | 5,50255  |
| H  | 13,6432  | 11,5559  | 6,99124  | C | 6,30745  | 14,79876 | 1,86996  |
| C  | 10,78004 | 13,219   | 10,36982 | C | 7,42184  | 15,30525 | 1,16317  |
| H  | 11,71078 | 12,70695 | 10,63945 | C | 8,06615  | 14,4674  | 0,24966  |
| H  | 9,93891  | 12,6936  | 10,84361 | H | 8,92652  | 14,8421  | -0,30675 |
| H  | 10,7872  | 14,23416 | 10,79064 | C | 7,6282   | 13,16513 | 0,03655  |
| C  | 11,44628 | 13,57015 | 4,57516  | H | 8,13768  | 12,52751 | -0,69021 |
| C  | 11,10803 | 12,73423 | 3,49396  | C | 6,55839  | 12,66997 | 0,76899  |
| C  | 11,48915 | 13,12661 | 2,2062   | H | 6,23991  | 11,63499 | 0,6246   |
| H  | 11,21959 | 12,49482 | 1,3567   | C | 5,88691  | 13,46273 | 1,70536  |
| C  | 12,19399 | 14,30243 | 1,98992  | C | 7,89484  | 16,73292 | 1,36245  |
| H  | 12,479   | 14,59348 | 0,97601  | H | 7,67899  | 16,98881 | 2,41251  |
| C  | 12,53084 | 15,11397 | 3,06867  | C | 7,11406  | 17,71961 | 0,4928   |
| H  | 13,08231 | 16,0386  | 2,89047  | H | 7,20546  | 17,4587  | -0,57374 |
| C  | 12,16314 | 14,77314 | 4,37204  | H | 7,50473  | 18,74073 | 0,62451  |
| C  | 10,33888 | 11,44336 | 3,67911  | H | 6,04595  | 17,7421  | 0,7496   |
| H  | 10,13993 | 11,32006 | 4,75333  | C | 9,39647  | 16,90234 | 1,15706  |
| C  | 11,14076 | 10,232   | 3,20135  | H | 9,67975  | 16,80298 | 0,09712  |
| H  | 11,31599 | 10,26958 | 2,11437  | H | 9,97235  | 16,16638 | 1,73668  |
| H  | 10,59169 | 9,30182  | 3,41548  | H | 9,70954  | 17,90634 | 1,48052  |
| H  | 12,124   | 10,16828 | 3,69104  | C | 4,77134  | 12,84886 | 2,52883  |
| C  | 8,98806  | 11,51038 | 2,97369  | H | 4,28501  | 13,65413 | 3,09888  |
| H  | 9,1091   | 11,55447 | 1,88084  | C | 3,70939  | 12,16463 | 1,66827  |
| H  | 8,417    | 12,39825 | 3,27787  | H | 4,11353  | 11,2794  | 1,15241  |

|   |          |          |          |   |         |          |         |
|---|----------|----------|----------|---|---------|----------|---------|
| H | 8,3808   | 10,62554 | 3,21604  | H | 3,29753 | 12,83245 | 0,89605 |
| C | 12,554   | 15,66345 | 5,53784  | H | 2,87544 | 11,82098 | 2,29882 |
| H | 11,80912 | 15,49309 | 6,33076  | C | 5,34668 | 11,8661  | 3,54864 |
| C | 13,91955 | 15,27005 | 6,10655  | H | 5,83598 | 11,01717 | 3,04469 |
| H | 14,70388 | 15,36884 | 5,33878  | H | 4,54702 | 11,46876 | 4,19182 |
| H | 13,93302 | 14,23346 | 6,4684   | H | 6,08558 | 12,34284 | 4,20597 |
| H | 14,18737 | 15,92109 | 6,95341  | C | 5,8616  | 18,55687 | 5,85394 |
| C | 12,53102 | 17,14911 | 5,19274  | C | 6,85696 | 19,47573 | 5,44677 |
| H | 11,56211 | 17,44643 | 4,76401  | C | 7,37388 | 20,36013 | 6,39605 |
| H | 13,32306 | 17,41783 | 4,4764   | H | 8,13758 | 21,08059 | 6,09743 |
| H | 12,70197 | 17,7504  | 6,09849  | C | 6,94043 | 20,33114 | 7,71762 |
| C | 8,86057  | 14,84625 | 9,23486  | H | 7,36273 | 21,02598 | 8,44733 |
| C | 7,81011  | 14,30239 | 10,00625 | C | 5,98059 | 19,40728 | 8,10723 |
| C | 7,17273  | 15,13602 | 10,92999 | H | 5,65168 | 19,37678 | 9,14862 |
| H | 6,36585  | 14,72869 | 11,54349 | C | 5,41968 | 18,5102  | 7,1911  |
| C | 7,53015  | 16,47068 | 11,07037 | C | 7,32501 | 19,53765 | 4,00548 |
| H | 7,02031  | 17,10157 | 11,80263 | H | 7,14682 | 18,54105 | 3,57335 |
| C | 8,51522  | 17,00932 | 10,25192 | C | 6,49761 | 20,53561 | 3,19305 |
| H | 8,76674  | 18,06803 | 10,33673 | H | 6,85382 | 20,57785 | 2,15226 |
| C | 9,19451  | 16,21521 | 9,32393  | H | 6,57651 | 21,54809 | 3,62049 |
| C | 7,32257  | 12,8757  | 9,83822  | H | 5,43396 | 20,2622  | 3,16641 |
| H | 8,03268  | 12,34704 | 9,18534  | C | 8,8148  | 19,83582 | 3,87244 |
| C | 7,23327  | 12,11567 | 11,16135 | H | 9,12464 | 19,74382 | 2,82046 |
| H | 6,96047  | 11,06537 | 10,97687 | H | 9,41723 | 19,13326 | 4,46745 |
| H | 6,46251  | 12,5402  | 11,82367 | H | 9,06231 | 20,86088 | 4,19004 |
| H | 8,18353  | 12,12463 | 11,71692 | C | 4,37526 | 17,52175 | 7,66577 |
| C | 5,96833  | 12,86481 | 9,12642  | H | 4,01432 | 16,96461 | 6,78963 |
| H | 5,64015  | 11,83028 | 8,94361  | C | 3,17764 | 18,21443 | 8,31679 |
| H | 6,01307  | 13,37191 | 8,15339  | H | 2,72684 | 18,97293 | 7,65899 |
| H | 5,20025  | 13,36571 | 9,73772  | H | 3,46338 | 18,7212  | 9,25214 |
| C | 10,29369 | 16,81475 | 8,46975  | H | 2,40125 | 17,4756  | 8,56829 |
| H | 10,37853 | 16,18443 | 7,57163  | C | 4,99449 | 16,50778 | 8,62351 |
| C | 11,64702 | 16,76497 | 9,17962  | H | 5,87531 | 16,01876 | 8,18446 |
| H | 12,42886 | 17,22665 | 8,55617  | H | 4,27098 | 15,71841 | 8,87605 |
| H | 11,95876 | 15,73141 | 9,38993  | H | 5,31594 | 16,99123 | 9,5575  |

**Table S31.** Cartesian coordinates (x,y,z) for the optimized geometry of **9**.

|    |          |         |         |   |         |         |         |
|----|----------|---------|---------|---|---------|---------|---------|
| As | 7,81128  | 3,40181 | 5,20603 | H | 6,33419 | 0,00169 | 3,82827 |
| Ga | 10,17437 | 2,9719  | 4,91998 | H | 6,36584 | -0,0161 | 2,05631 |
| Ga | 7,26864  | 5,40744 | 3,98195 | C | 4,72162 | 6,58261 | 3,30429 |
| Cl | 11,69864 | 4,56978 | 4,86433 | C | 5,3225  | 7,83801 | 3,52208 |
| Cl | 8,1415   | 5,58878 | 1,96061 | H | 4,74842 | 8,697   | 3,17851 |
| N  | 10,83969 | 1,84327 | 6,39767 | C | 6,45287 | 8,13359 | 4,29055 |
| N  | 10,7655  | 1,77358 | 3,47924 | C | 3,32666 | 6,60276 | 2,74474 |
| N  | 5,31812  | 5,4309  | 3,57443 | H | 3,37773 | 6,61142 | 1,64509 |
| N  | 7,2911   | 7,20884 | 4,78211 | H | 2,79513 | 7,50843 | 3,06244 |

|   |          |          |          |   |          |          |          |
|---|----------|----------|----------|---|----------|----------|----------|
| C | 11,89022 | 1,05011  | 6,20591  | H | 2,75214  | 5,71582  | 3,0396   |
| C | 12,36775 | 0,69296  | 4,93804  | C | 6,70855  | 9,5893   | 4,58259  |
| H | 13,236   | 0,03569  | 4,92998  | H | 7,66818  | 9,89433  | 4,14486  |
| C | 11,78041 | 0,93611  | 3,68467  | H | 6,78902  | 9,78351  | 5,65916  |
| C | 12,62374 | 0,49239  | 7,39307  | H | 5,91092  | 10,21492 | 4,16556  |
| H | 13,14684 | -0,43664 | 7,13629  | C | 4,62066  | 4,1922   | 3,44687  |
| H | 11,95571 | 0,3154   | 8,24541  | C | 4,43276  | 3,59368  | 2,18436  |
| H | 13,37725 | 1,22806  | 7,71776  | C | 3,7731   | 2,36015  | 2,13078  |
| C | 12,35098 | 0,1731   | 2,52184  | H | 3,62239  | 1,88111  | 1,16039  |
| H | 11,55575 | -0,24517 | 1,88973  | C | 3,32069  | 1,72964  | 3,2809   |
| H | 13,00375 | -0,63534 | 2,87067  | H | 2,81714  | 0,76257  | 3,21517  |
| H | 12,9395  | 0,84461  | 1,88026  | C | 3,51364  | 2,33289  | 4,51951  |
| C | 10,21466 | 1,92695  | 7,67585  | H | 3,15566  | 1,83283  | 5,4208   |
| C | 10,62361 | 2,88649  | 8,62369  | C | 4,15767  | 3,56623  | 4,62645  |
| C | 9,92814  | 2,95461  | 9,836    | C | 4,92585  | 4,21799  | 0,89309  |
| H | 10,22906 | 3,69631  | 10,57994 | H | 5,36063  | 5,19929  | 1,13259  |
| C | 8,86382  | 2,10466  | 10,10807 | C | 6,04511  | 3,38058  | 0,28193  |
| H | 8,33314  | 2,1778   | 11,06014 | H | 5,68472  | 2,3775   | 0,00178  |
| C | 8,47478  | 1,15939  | 9,16329  | H | 6,88199  | 3,26208  | 0,98021  |
| H | 7,63766  | 0,4932   | 9,38216  | H | 6,44242  | 3,8641   | -0,62389 |
| C | 9,13412  | 1,05252  | 7,93648  | C | 3,79451  | 4,42032  | -0,11659 |
| C | 11,78057 | 3,83576  | 8,37886  | H | 4,16301  | 4,96639  | -0,99884 |
| H | 12,2083  | 3,59514  | 7,3948   | H | 2,94999  | 4,98432  | 0,30613  |
| C | 11,31313 | 5,28951  | 8,31575  | H | 3,39765  | 3,45582  | -0,47137 |
| H | 12,16535 | 5,95887  | 8,1244   | C | 4,30816  | 4,24957  | 5,97035  |
| H | 10,83932 | 5,60655  | 9,2589   | H | 5,23903  | 4,83641  | 5,92061  |
| H | 10,59318 | 5,44982  | 7,50255  | C | 3,17235  | 5,24522  | 6,21458  |
| C | 12,87905 | 3,66439  | 9,42987  | H | 3,14778  | 6,0353   | 5,45136  |
| H | 13,21937 | 2,62063  | 9,50348  | H | 3,29123  | 5,73448  | 7,19412  |
| H | 12,53358 | 3,96846  | 10,43092 | H | 2,1967   | 4,73387  | 6,20552  |
| H | 13,74942 | 4,28985  | 9,1779   | C | 4,43714  | 3,27934  | 7,13747  |
| C | 8,72199  | -0,00744 | 6,93136  | H | 3,4982   | 2,73483  | 7,32377  |
| H | 9,09896  | 0,317    | 5,95007  | H | 4,6794   | 3,82769  | 8,06052  |
| C | 7,21059  | -0,16447 | 6,80518  | H | 5,23431  | 2,54287  | 6,95886  |
| H | 6,73444  | 0,79133  | 6,54013  | C | 8,19671  | 7,63396  | 5,8049   |
| H | 6,75155  | -0,5417  | 7,73253  | C | 9,53255  | 7,9766   | 5,49111  |
| H | 6,97307  | -0,88871 | 6,0113   | C | 10,31936 | 8,51201  | 6,51781  |
| C | 9,38759  | -1,34779 | 7,25304  | H | 11,34951 | 8,79634  | 6,30656  |
| H | 9,11637  | -2,10657 | 6,50248  | C | 9,8265   | 8,68458  | 7,8053   |
| H | 9,06632  | -1,71601 | 8,24096  | H | 10,46624 | 9,10959  | 8,58234  |
| H | 10,4837  | -1,26777 | 7,26667  | C | 8,53206  | 8,28569  | 8,10795  |
| C | 10,19086 | 1,8595   | 2,17193  | H | 8,16249  | 8,38774  | 9,12987  |
| C | 10,81064 | 2,6265   | 1,16216  | C | 7,69694  | 7,74886  | 7,1242   |
| C | 10,24492 | 2,60777  | -0,11678 | C | 10,13703 | 7,74867  | 4,1101   |
| H | 10,70741 | 3,19979  | -0,90989 | H | 9,90057  | 6,70494  | 3,84089  |
| C | 9,11723  | 1,84976  | -0,39993 | C | 11,65711 | 7,87475  | 4,09872  |



|   |          |          |          |   |          |         |         |
|---|----------|----------|----------|---|----------|---------|---------|
| H | 8,70248  | 1,8389   | -1,41045 | H | 12,0438  | 7,52846 | 3,1298  |
| C | 8,50255  | 1,12479  | 0,61418  | H | 12,13228 | 7,26542 | 4,87797 |
| H | 7,60095  | 0,54979  | 0,39516  | H | 11,97584 | 8,92265 | 4,22483 |
| C | 9,00772  | 1,13275  | 1,91553  | C | 9,57156  | 8,63647 | 2,99935 |
| C | 12,04862 | 3,47048  | 1,40493  | H | 10,11399 | 8,43314 | 2,06407 |
| H | 12,41162 | 3,25584  | 2,42103  | H | 9,70775  | 9,70427 | 3,23811 |
| C | 13,17336 | 3,15863  | 0,4149   | H | 8,51372  | 8,44065 | 2,79126 |
| H | 12,9076  | 3,46817  | -0,60806 | C | 6,29464  | 7,29388 | 7,50468 |
| H | 13,41997 | 2,08673  | 0,37469  | H | 6,00176  | 6,53068 | 6,76789 |
| H | 14,08692 | 3,70665  | 0,69283  | C | 6,2525   | 6,65127 | 8,89251 |
| C | 11,71083 | 4,96091  | 1,35767  | H | 5,29077  | 6,13529 | 9,03892 |
| H | 11,36881 | 5,25708  | 0,35298  | H | 6,33268  | 7,40561 | 9,69092 |
| H | 12,60044 | 5,55981  | 1,60646  | H | 7,05884  | 5,91876 | 9,03706 |
| H | 10,91567 | 5,2155   | 2,0687   | C | 5,24339  | 8,40618 | 7,43693 |
| C | 8,31186  | 0,34079  | 3,00627  | H | 5,04274  | 8,73432 | 6,40973 |
| H | 8,62908  | 0,77118  | 3,96807  | H | 5,55779  | 9,28218 | 8,0271  |
| C | 8,75033  | -1,12366 | 3,00322  | H | 4,28902  | 8,04903 | 7,85432 |
| H | 8,48595  | -1,61181 | 2,05125  | C | 7,85047  | 4,20558 | 7,01462 |
| H | 8,25579  | -1,67873 | 3,81634  | H | 8,5719   | 5,02189 | 7,12014 |
| H | 9,83671  | -1,22475 | 3,14331  | H | 8,06306  | 3,42528 | 7,75164 |
| C | 6,7936   | 0,47162  | 2,94643  | H | 6,84763  | 4,59311 | 7,21401 |
| H | 6,48008  | 1,52474  | 2,94039  |   |          |         |         |

**Table S32.** Cartesian coordinates (x,y,z) for the optimized geometry of **10**.

|    |         |         |         |   |          |          |         |
|----|---------|---------|---------|---|----------|----------|---------|
| Sb | 7,93711 | 4,40713 | 4,4874  | H | 8,54362  | 8,80353  | 3,74758 |
| Ga | 5,39263 | 4,8233  | 4,87936 | H | 8,68686  | 8,52349  | 2,00625 |
| Ga | 8,50802 | 2,22192 | 5,77591 | C | 9,34053  | -0,49234 | 5,47673 |
| Cl | 3,8423  | 3,24908 | 4,97202 | C | 10,45146 | -0,19173 | 6,27211 |
| Cl | 7,6199  | 1,98165 | 7,79134 | H | 11,01705 | -1,04807 | 6,6364  |
| N  | 4,86161 | 6,00872 | 6,35957 | C | 11,04873 | 1,06614  | 6,49167 |
| N  | 4,70053 | 5,99472 | 3,44866 | C | 9,08686  | -1,94785 | 5,18401 |
| N  | 8,51877 | 0,43195 | 4,95837 | H | 9,02889  | -2,14388 | 4,10606 |
| N  | 10,4545 | 2,21433 | 6,20423 | H | 8,1163   | -2,24659 | 5,60265 |
| C  | 3,83428 | 6,84099 | 6,20324 | H | 9,87271  | -2,57587 | 5,61945 |
| C  | 3,20561 | 7,10183 | 4,9728  | C | 12,43518 | 1,05216  | 7,07204 |
| H  | 2,3299  | 7,74751 | 5,02021 | H | 12,98623 | 0,16456  | 6,73635 |
| C  | 3,64703 | 6,77216 | 3,6842  | H | 12,36794 | 1,00939  | 8,17002 |
| C  | 3,2938  | 7,57297 | 7,39989 | H | 12,99911 | 1,95623  | 6,81073 |
| H  | 4,10506 | 7,99028 | 8,01211 | C | 7,65627  | 0,02732  | 3,89273 |
| H  | 2,73894 | 6,87904 | 8,04791 | C | 8,21513  | -0,08479 | 2,59666 |
| H  | 2,61751 | 8,3785  | 7,09133 | C | 7,41749  | -0,59782 | 1,57028 |
| C  | 2,86874 | 7,33451 | 2,52825 | H | 7,833    | -0,69982 | 0,56625 |
| H  | 3,50565 | 7,52513 | 1,6553  | C | 6,09973  | -0,96562 | 1,80589 |
| H  | 2,34505 | 8,25582 | 2,81077 | H | 5,48922  | -1,37093 | 0,99557 |
| H  | 2,11217 | 6,59349 | 2,22283 | C | 5,54711  | -0,78389 | 3,06755 |
| C  | 5,48223 | 5,89674 | 7,64325 | H | 4,49972  | -1,03858 | 3,22535 |

|   |         |         |          |   |          |          |          |
|---|---------|---------|----------|---|----------|----------|----------|
| C | 4,90795 | 5,09467 | 8,65276  | C | 6,29681  | -0,2764  | 4,13554  |
| C | 5,5205  | 5,08108 | 9,91015  | C | 9,6351   | 0,36893  | 2,28561  |
| H | 5,09195 | 4,46243 | 10,70194 | H | 9,87682  | 1,15288  | 3,02006  |
| C | 6,65504 | 5,83602 | 10,17178 | C | 10,68886 | -0,73296 | 2,43654  |
| H | 7,11001 | 5,81812 | 11,16469 | H | 10,4096  | -1,6256  | 1,85372  |
| C | 7,22851 | 6,59188 | 9,1559   | H | 10,84044 | -1,03276 | 3,48044  |
| H | 8,138   | 7,16072 | 9,35644  | H | 11,66085 | -0,38016 | 2,05814  |
| C | 6,6711  | 6,62335 | 7,87639  | C | 9,75502  | 0,98002  | 0,88828  |
| C | 3,67606 | 4,23798 | 8,4272   | H | 9,73505  | 0,20686  | 0,10404  |
| H | 3,27607 | 4,47459 | 7,43035  | H | 10,71746 | 1,50604  | 0,7901   |
| C | 4,04471 | 2,75379 | 8,41922  | H | 8,94952  | 1,69684  | 0,67732  |
| H | 3,16522 | 2,14431 | 8,16031  | C | 5,63105  | -0,0339  | 5,48487  |
| H | 4,40673 | 2,43087 | 9,40851  | H | 5,88909  | 0,99953  | 5,7769   |
| H | 4,83601 | 2,53915 | 7,69029  | C | 6,11375  | -0,95232 | 6,60947  |
| C | 2,57838 | 4,50204 | 9,45996  | H | 5,95679  | -2,01154 | 6,34655  |
| H | 2,3082  | 5,56687 | 9,52923  | H | 5,53516  | -0,74458 | 7,52176  |
| H | 2,88408 | 4,1786  | 10,46737 | H | 7,16647  | -0,79247 | 6,86821  |
| H | 1,6692  | 3,93843 | 9,19966  | C | 4,1091   | -0,10678 | 5,41872  |
| C | 7,32045 | 7,44929 | 6,78197  | H | 3,69543  | 0,52173  | 4,61983  |
| H | 7,01084 | 7,00573 | 5,82306  | H | 3,68549  | 0,25204  | 6,36738  |
| C | 8,84404 | 7,391   | 6,82637  | H | 3,76198  | -1,14289 | 5,272    |
| H | 9,21044 | 6,35559 | 6,87262  | C | 11,1261  | 3,46427  | 6,3512   |
| H | 9,25575 | 7,93513 | 7,69095  | C | 11,58518 | 4,11802  | 5,18398  |
| H | 9,26985 | 7,84691 | 5,92055  | C | 12,18783 | 5,37008  | 5,3137   |
| C | 6,81922 | 8,89338 | 6,78796  | H | 12,54187 | 5,89171  | 4,42361  |
| H | 7,29397 | 9,4718  | 5,97942  | C | 12,34172 | 5,96789  | 6,56026  |
| H | 7,05917 | 9,38787 | 7,7431   | H | 12,81218 | 6,95024  | 6,64212  |
| H | 5,73077 | 8,94931 | 6,64146  | C | 11,89045 | 5,31306  | 7,69691  |
| C | 5,29667 | 5,93621 | 2,1556   | H | 12,00854 | 5,7878   | 8,67394  |
| C | 4,86957 | 4,9904  | 1,20202  | C | 11,27307 | 4,05899  | 7,62155  |
| C | 5,52236 | 4,95749 | -0,0353  | C | 11,46584 | 3,45221  | 3,82705  |
| H | 5,20379 | 4,22915 | -0,78493 | H | 10,51591 | 2,89177  | 3,83351  |
| C | 6,5713  | 5,8216  | -0,32181 | C | 12,58478 | 2,43052  | 3,61264  |
| H | 7,07114 | 5,77469 | -1,29197 | H | 12,49936 | 1,9659   | 2,61803  |
| C | 6,98764 | 6,74464 | 0,63318  | H | 12,55308 | 1,62375  | 4,35755  |
| H | 7,81366 | 7,42059 | 0,403    | H | 13,57137 | 2,91598  | 3,67775  |
| C | 6,36445 | 6,82294 | 1,88098  | C | 11,407   | 4,43659  | 2,66522  |
| C | 3,74543 | 4,01143 | 1,47602  | H | 11,18127 | 3,9032   | 1,7295   |
| H | 3,33537 | 4,24234 | 2,46967  | H | 12,36811 | 4,9532   | 2,51624  |
| C | 2,61426 | 4,14476 | 0,45581  | H | 10,62768 | 5,19793  | 2,82145  |
| H | 2,24072 | 5,17787 | 0,39063  | C | 10,77636 | 3,41134  | 8,89978  |
| H | 1,77061 | 3,49472 | 0,73492  | H | 10,36089 | 2,42571  | 8,64518  |
| H | 2,93875 | 3,84793 | -0,55436 | C | 11,90081 | 3,2174   | 9,91887  |
| C | 4,26563 | 2,57504 | 1,53538  | H | 12,75783 | 2,67035  | 9,49917  |
| H | 4,71439 | 2,26532 | 0,57754  | H | 11,53254 | 2,65788  | 10,79277 |
| H | 3,44592 | 1,87854 | 1,76805  | H | 12,27929 | 4,18496  | 10,28537 |

|   |         |         |         |   |         |         |          |
|---|---------|---------|---------|---|---------|---------|----------|
| H | 5,02413 | 2,45381 | 2,32027 | C | 9,63651 | 4,22336 | 9,50814  |
| C | 6,78757 | 7,87647 | 2,88875 | H | 9,97986 | 5,22444 | 9,81544  |
| H | 6,47069 | 7,51774 | 3,87989 | H | 9,22987 | 3,71688 | 10,39701 |
| C | 6,05855 | 9,19701 | 2,62883 | H | 8,80981 | 4,34688 | 8,79815  |
| H | 6,32008 | 9,59588 | 1,63524 | C | 7,82272 | 3,49871 | 2,52537  |
| H | 6,33794 | 9,95012 | 3,38206 | H | 7,41237 | 4,22712 | 1,81798  |
| H | 4,96696 | 9,07764 | 2,66434 | H | 7,22286 | 2,58306 | 2,5131   |
| C | 8,29544 | 8,09548 | 2,94236 | H | 8,85112 | 3,26378 | 2,23025  |
| H | 8,82799 | 7,15441 | 3,14622 |   |         |         |          |

**Table S33.** Cartesian coordinates (x,y,z) for the optimized geometry of **III**.

|    |          |          |         |   |          |          |          |
|----|----------|----------|---------|---|----------|----------|----------|
| As | 7,38934  | 3,65609  | 4,20298 | H | 4,81583  | -1,89994 | 3,22763  |
| Ga | 8,19579  | 2,12829  | 5,81941 | H | 6,77542  | -0,73993 | 6,20233  |
| Ga | 5,65114  | 4,87603  | 4,98362 | C | 5,69215  | -2,54005 | 5,795    |
| Cl | 7,23451  | 1,54449  | 7,73787 | C | 4,75611  | -0,20294 | 5,81088  |
| N  | 10,10727 | 2,28273  | 6,37476 | H | 7,45452  | 6,97912  | 9,78122  |
| N  | 8,46376  | 0,38765  | 4,88364 | C | 5,95464  | 5,54449  | 10,34282 |
| N  | 4,64103  | 5,78622  | 6,35889 | H | 6,53413  | 7,19218  | 6,13476  |
| N  | 4,71342  | 5,76303  | 3,49835 | C | 8,43873  | 6,98149  | 7,05811  |
| C  | 10,84084 | 1,19054  | 6,56564 | C | 6,75879  | 8,82251  | 7,48033  |
| C  | 10,65375 | 3,56521  | 6,67873 | H | 4,39582  | 4,09412  | 10,63066 |
| C  | 9,40614  | -0,45668 | 5,30081 | H | 2,77044  | 4,50034  | 7,3196   |
| C  | 7,60404  | -0,04068 | 3,82488 | C | 3,79224  | 2,64622  | 7,49924  |
| C  | 3,62483  | 6,63025  | 6,12648 | C | 2,24871  | 3,66507  | 9,20463  |
| C  | 5,11371  | 5,66254  | 7,70354 | H | 7,61851  | 6,78125  | 0,09096  |
| C  | 3,66404  | 6,56271  | 3,615   | C | 6,54184  | 4,94137  | -0,19464 |
| C  | 5,29026  | 5,51153  | 2,21638 | H | 5,91749  | 7,80655  | 3,28848  |
| C  | 10,45184 | -0,09738 | 6,16256 | C | 6,52656  | 8,92442  | 1,5776   |
| C  | 12,18188 | 1,29545  | 7,23998 | C | 8,02067  | 7,55906  | 3,08262  |
| C  | 11,15181 | 4,34912  | 5,61381 | H | 5,34717  | 3,1522   | -0,22699 |
| C  | 10,70122 | 4,03338  | 8,00823 | H | 3,66597  | 3,68027  | 3,09575  |
| C  | 9,39336  | -1,87848 | 4,80977 | C | 2,62312  | 3,42751  | 1,24695  |
| C  | 7,95696  | 0,2792   | 2,49514 | C | 4,43529  | 1,93173  | 2,1522   |
| C  | 6,45275  | -0,80576 | 4,10007 | H | 12,20724 | 7,04588  | 7,42339  |
| C  | 3,12718  | 6,93741  | 4,85829 | H | 10,85628 | 4,4106   | 2,14712  |
| C  | 2,9835   | 7,32618  | 7,29462 | H | 11,79782 | 5,58787  | 3,0793   |
| C  | 6,2153   | 6,44116  | 8,10363 | H | 10,03201 | 5,44495  | 3,33149  |
| C  | 4,44413  | 4,80006  | 8,59532 | H | 12,46319 | 2,63537  | 2,9019   |
| C  | 3,0462   | 7,15415  | 2,3826  | H | 12,55698 | 2,16468  | 4,61044  |
| C  | 6,24653  | 6,41453  | 1,7114  | H | 13,33956 | 3,66628  | 4,06151  |
| C  | 4,95188  | 4,32643  | 1,53392 | H | 8,12179  | 4,03532  | 8,90363  |
| H  | 11,1352  | -0,90008 | 6,43444 | H | 9,09513  | 4,91061  | 10,11109 |
| H  | 12,81481 | 0,43802  | 6,98177 | H | 8,40721  | 3,31168  | 10,49449 |
| H  | 12,04522 | 1,30103  | 8,33191 | H | 12,09693 | 2,62404  | 9,94828  |
| H  | 12,70123 | 2,2258   | 6,97651 | H | 10,73957 | 2,39754  | 11,0802  |
| C  | 11,69903 | 5,60049  | 5,90503 | H | 11,39558 | 4,01836  | 10,78726 |

|   |          |          |          |   |          |          |          |
|---|----------|----------|----------|---|----------|----------|----------|
| C | 11,16922 | 3,81074  | 4,19787  | H | 5,48734  | -1,44879 | 0,886    |
| C | 11,27343 | 5,28702  | 8,24888  | H | 8,77274  | 1,60524  | 0,07523  |
| C | 10,1362  | 3,24476  | 9,17352  | H | 9,7522   | 2,80818  | 0,92778  |
| H | 9,36167  | -1,92039 | 3,71189  | H | 8,00428  | 2,72607  | 1,23622  |
| H | 8,48826  | -2,39257 | 5,16372  | H | 10,24609 | -0,39241 | 1,0794   |
| H | 10,27372 | -2,42546 | 5,16676  | H | 10,69737 | -0,29099 | 2,79966  |
| C | 7,18562  | -0,24581 | 1,45562  | H | 11,26442 | 0,94775  | 1,66224  |
| C | 9,16229  | 1,14431  | 2,18352  | H | 4,83424  | -2,90856 | 5,21039  |
| C | 5,70625  | -1,29963 | 3,02548  | H | 5,44955  | -2,68392 | 6,85927  |
| C | 5,98116  | -1,06656 | 5,51554  | H | 6,55295  | -3,18371 | 5,55694  |
| H | 2,27136  | 7,60966  | 4,82827  | H | 4,97155  | 0,85605  | 5,61337  |
| H | 2,20752  | 8,02014  | 6,95223  | H | 4,45804  | -0,29601 | 6,86611  |
| H | 3,73613  | 7,88327  | 7,87116  | H | 3,90202  | -0,50054 | 5,18023  |
| H | 2,53593  | 6,60486  | 7,99344  | H | 6,2835   | 5,49931  | 11,38347 |
| C | 6,60917  | 6,37526  | 9,44326  | H | 8,57908  | 5,93426  | 6,75077  |
| C | 6,95994  | 7,34592  | 7,13944  | H | 8,94721  | 7,12072  | 8,02377  |
| C | 4,89176  | 4,75355  | 9,91671  | H | 8,95246  | 7,61471  | 6,31902  |
| C | 3,28394  | 3,94471  | 8,12053  | H | 7,28119  | 9,46078  | 6,75076  |
| H | 3,68907  | 7,95923  | 1,99391  | H | 7,15872  | 9,061    | 8,47875  |
| H | 2,05787  | 7,57573  | 2,60166  | H | 5,69403  | 9,10148  | 7,47232  |
| H | 2,96245  | 6,40805  | 1,58175  | H | 4,50637  | 2,83453  | 6,68256  |
| C | 6,86458  | 6,10305  | 0,49786  | H | 2,95853  | 2,05346  | 7,09197  |
| C | 6,62965  | 7,67967  | 2,45879  | H | 4,32844  | 2,03531  | 8,23988  |
| C | 5,59055  | 4,06663  | 0,31881  | H | 1,37512  | 3,15694  | 8,76911  |
| C | 3,91151  | 3,36133  | 2,07083  | H | 1,89999  | 4,59161  | 9,6872   |
| H | 12,08755 | 6,21714  | 5,09259  | H | 2,64506  | 3,00365  | 9,99038  |
| C | 11,76937 | 6,06722  | 7,21318  | H | 7,04025  | 4,71396  | -1,13972 |
| H | 10,32835 | 3,10619  | 4,11828  | H | 7,26893  | 8,90842  | 0,7644   |
| C | 10,95442 | 4,88115  | 3,13696  | H | 6,71182  | 9,83263  | 2,17201  |
| C | 12,45372 | 3,02352  | 3,93231  | H | 5,53221  | 9,01769  | 1,11413  |
| H | 11,32298 | 5,66013  | 9,27496  | H | 8,79651  | 7,47272  | 2,30528  |
| H | 9,84186  | 2,25197  | 8,80301  | H | 8,09165  | 6,66677  | 3,72367  |
| C | 8,86936  | 3,91455  | 9,6976   | H | 8,2509   | 8,44792  | 3,69189  |
| C | 11,1507  | 3,05979  | 10,30266 | H | 2,19867  | 4,44224  | 1,21827  |
| H | 7,45666  | -0,01836 | 0,42274  | H | 1,8591   | 2,75514  | 1,66761  |
| C | 6,07655  | -1,04382 | 1,71225  | H | 2,80639  | 3,11633  | 0,2061   |
| H | 9,35778  | 1,74519  | 3,0838   | H | 4,6384   | 1,51537  | 1,15413  |
| C | 8,90069  | 2,12008  | 1,04083  | H | 3,69361  | 1,2761   | 2,63373  |
| C | 10,41035 | 0,30182  | 1,91943  | H | 5,36581  | 1,88481  | 2,7367   |

**Table S34.** Cartesian coordinates (x,y,z) for the optimized geometry of **IV**.

|    |         |         |          |   |         |          |          |
|----|---------|---------|----------|---|---------|----------|----------|
| Sb | 4,20185 | 5,06923 | 9,78872  | C | 3,20612 | 11,53362 | 9,69624  |
| Ga | 2,01586 | 6,39224 | 9,68637  | H | 4,18313 | 12,04134 | 9,66     |
| Ga | 4,78057 | 4,3849  | 7,5133   | H | 2,73261 | 11,80084 | 10,65327 |
| Cl | 1,26937 | 7,52335 | 7,91486  | H | 2,58875 | 11,95055 | 8,88549  |
| N  | 0,31425 | 5,68565 | 10,44989 | C | 5,2871  | 3,40396  | 4,82989  |

|   |          |          |          |   |          |         |          |
|---|----------|----------|----------|---|----------|---------|----------|
| N | 2,23125  | 7,79095  | 11,09444 | C | 6,56637  | 2,9768  | 5,1952   |
| N | 4,43     | 4,03244  | 5,64973  | H | 7,1454   | 2,48707 | 4,41418  |
| N | 6,63355  | 3,7124   | 7,47464  | C | 7,21841  | 3,1472  | 6,43057  |
| C | -0,47903 | 6,47512  | 11,16892 | C | 4,86805  | 3,15142 | 3,40837  |
| C | -0,1126  | 7,74803  | 11,64071 | H | 4,50692  | 4,07623 | 2,93655  |
| H | -0,89629 | 8,29906  | 12,15852 | H | 4,03122  | 2,43847 | 3,36987  |
| C | 1,16473  | 8,32524  | 11,68214 | H | 5,70311  | 2,74778 | 2,82426  |
| C | -1,86417 | 6,01158  | 11,53087 | C | 8,62624  | 2,64159 | 6,54902  |
| H | -2,55093 | 6,21016  | 10,69412 | H | 9,08476  | 2,51897 | 5,56046  |
| H | -2,23618 | 6,55125  | 12,41011 | H | 8,62684  | 1,66202 | 7,05236  |
| H | -1,89613 | 4,93125  | 11,72371 | H | 9,24173  | 3,31217 | 7,16307  |
| C | 1,31592  | 9,6078   | 12,45213 | C | 3,18351  | 4,47725 | 5,1069   |
| H | 1,52291  | 10,43206 | 11,75287 | C | 2,13647  | 3,5496  | 4,93837  |
| H | 2,16912  | 9,565    | 13,14272 | C | 0,97782  | 3,98364 | 4,2911   |
| H | 0,40467  | 9,8436   | 13,01433 | H | 0,1558   | 3,28403 | 4,13159  |
| C | -0,1059  | 4,3609   | 10,12028 | C | 0,84865  | 5,29973 | 3,86329  |
| C | 0,41837  | 3,28363  | 10,87115 | H | -0,06665 | 5,62299 | 3,36238  |
| C | 0,00189  | 1,98711  | 10,5609  | C | 1,86371  | 6,21695 | 4,10808  |
| H | 0,39972  | 1,14668  | 11,13204 | H | 1,72582  | 7,25607 | 3,8092   |
| C | -0,9142  | 1,74955  | 9,54196  | C | 3,0517   | 5,83138 | 4,73658  |
| H | -1,23372 | 0,72891  | 9,31775  | C | 2,23808  | 2,14303 | 5,4998   |
| C | -1,41075 | 2,81537  | 8,80451  | H | 3,3034   | 1,86437 | 5,52339  |
| H | -2,11927 | 2,62523  | 7,99414  | C | 1,73296  | 2,12199 | 6,94478  |
| C | -1,01441 | 4,1319   | 9,06552  | H | 0,67371  | 2,41314 | 6,99651  |
| C | 1,37337  | 3,53046  | 12,0216  | H | 2,28911  | 2,81907 | 7,5923   |
| H | 1,96789  | 4,41508  | 11,74519 | H | 1,82695  | 1,11475 | 7,38012  |
| C | 2,35968  | 2,39098  | 12,24151 | C | 1,51589  | 1,09794 | 4,65531  |
| H | 1,87222  | 1,4886   | 12,64404 | H | 1,82394  | 1,13627 | 3,59858  |
| H | 3,12976  | 2,69529  | 12,96569 | H | 0,42317  | 1,22815 | 4,69094  |
| H | 2,8712   | 2,12769  | 11,30495 | H | 1,73042  | 0,0882  | 5,0369   |
| C | 0,62277  | 3,86473  | 13,31116 | C | 4,15343  | 6,8391  | 5,02791  |
| H | 0,00927  | 4,77059  | 13,20743 | H | 4,49188  | 6,63827 | 6,06405  |
| H | 1,3325   | 4,03994  | 14,13491 | C | 3,66241  | 8,28049 | 5,00481  |
| H | -0,04126 | 3,03593  | 13,6052  | H | 3,39695  | 8,59975 | 3,9842   |
| C | -1,54495 | 5,24249  | 8,18001  | H | 4,4609   | 8,95    | 5,35513  |
| H | -1,19697 | 6,20202  | 8,58947  | H | 2,79082  | 8,41791 | 5,65927  |
| C | -0,95642 | 5,11967  | 6,77664  | C | 5,3675   | 6,69674 | 4,10666  |
| H | -1,29692 | 4,19348  | 6,28555  | H | 5,0783   | 6,86077 | 3,05604  |
| H | 0,14054  | 5,11216  | 6,79972  | H | 5,85231  | 5,71462 | 4,17919  |
| H | -1,26321 | 5,96965  | 6,14834  | H | 6,12561  | 7,45226 | 4,36636  |
| C | -3,07233 | 5,26631  | 8,11686  | C | 7,32938  | 3,90424 | 8,70701  |
| H | -3,41719 | 6,14169  | 7,54504  | C | 7,40966  | 2,8508  | 9,63859  |
| H | -3,53246 | 5,3084   | 9,11535  | C | 8,00453  | 3,1131  | 10,8764  |
| H | -3,4702  | 4,3712   | 7,61292  | H | 8,06795  | 2,31358 | 11,61845 |
| C | 3,53234  | 8,29005  | 11,4044  | C | 8,50102  | 4,37345 | 11,18383 |
| C | 4,27063  | 7,65433  | 12,42962 | H | 8,95663  | 4,55863 | 12,15933 |

|   |         |          |          |   |         |          |          |
|---|---------|----------|----------|---|---------|----------|----------|
| C | 5,54394 | 8,14071  | 12,73367 | C | 8,40814 | 5,40261  | 10,2532  |
| H | 6,12708 | 7,66003  | 13,52101 | H | 8,78292 | 6,39493  | 10,50958 |
| C | 6,08584 | 9,22107  | 12,04605 | C | 7,81388 | 5,19675  | 9,00707  |
| H | 7,0837  | 9,58805  | 12,29832 | C | 6,8395  | 1,47182  | 9,36089  |
| C | 5,35801 | 9,82187  | 11,0284  | H | 6,52627 | 1,44318  | 8,30609  |
| H | 5,7932  | 10,65869 | 10,4765  | C | 7,8799  | 0,37004  | 9,56629  |
| C | 4,07958 | 9,37021  | 10,68482 | H | 7,47067 | -0,60818 | 9,27018  |
| C | 3,698   | 6,48008  | 13,2019  | H | 8,17992 | 0,29168  | 10,62285 |
| H | 2,97616 | 5,98463  | 12,53345 | H | 8,79364 | 0,55121  | 8,97954  |
| C | 4,75295 | 5,44678  | 13,58572 | C | 5,59104 | 1,21323  | 10,20601 |
| H | 5,3486  | 5,13789  | 12,71367 | H | 4,83321 | 1,9924   | 10,03489 |
| H | 4,26813 | 4,55004  | 14,00048 | H | 5,83229 | 1,21849  | 11,28096 |
| H | 5,43956 | 5,82715  | 14,35845 | H | 5,15158 | 0,23287  | 9,96244  |
| C | 2,922   | 6,93765  | 14,43871 | C | 7,70959 | 6,33559  | 8,00966  |
| H | 2,05698 | 7,56221  | 14,17658 | H | 6,88847 | 6,08643  | 7,31663  |
| H | 3,57137 | 7,51779  | 15,11405 | C | 8,98421 | 6,45537  | 7,17197  |
| H | 2,54353 | 6,06783  | 14,99816 | H | 9,20326 | 5,52751  | 6,62321  |
| C | 3,34935 | 10,0217  | 9,52908  | H | 9,85272 | 6,67885  | 7,81225  |
| H | 2,34076 | 9,58677  | 9,47759  | H | 8,88972 | 7,26725  | 6,43366  |
| C | 4,04384 | 9,68642  | 8,21146  | C | 7,341   | 7,66251  | 8,66279  |
| H | 3,46926 | 10,08684 | 7,36376  | H | 7,15126 | 8,42368  | 7,89049  |
| H | 4,13164 | 8,59841  | 8,07738  | H | 8,14625 | 8,04777  | 9,30769  |
| H | 5,057   | 10,11937 | 8,17683  | H | 6,43125 | 7,55881  | 9,27282  |

**Table S35.** Cartesian coordinates (x,y,z) for the optimized geometry of [AsMe<sub>2</sub>]<sup>-</sup>.

|    |          |         |          |   |          |         |          |
|----|----------|---------|----------|---|----------|---------|----------|
| As | -5,51506 | 5,23683 | -0,43843 | C | -4,19048 | 3,81246 | 0,06397  |
| C  | -7,10284 | 4,05297 | -0,10201 | H | -3,18063 | 4,22529 | -0,0389  |
| H  | -7,10954 | 3,16384 | -0,74722 | H | -4,25644 | 2,9282  | -0,58461 |
| H  | -8,01346 | 4,62436 | -0,31438 | H | -4,30827 | 3,47551 | 1,10296  |
| H  | -7,15976 | 3,71098 | 0,94045  |   |          |         |          |

**Table S36.** Cartesian coordinates (x,y,z) for the optimized geometry of [SbMe<sub>2</sub>]<sup>-</sup>.

|    |          |         |          |   |          |         |          |
|----|----------|---------|----------|---|----------|---------|----------|
| Sb | -5,50473 | 5,37586 | -0,46537 | C | -4,06716 | 3,78103 | 0,06645  |
| C  | -7,23029 | 4,04344 | -0,09126 | H | -3,0531  | 4,17878 | -0,03423 |
| H  | -7,20639 | 3,17271 | -0,75209 | H | -4,16825 | 2,92073 | -0,60072 |
| H  | -8,15021 | 4,60154 | -0,28859 | H | -4,20781 | 3,45198 | 1,0996   |
| H  | -7,24853 | 3,70438 | 0,94804  |   |          |         |          |

**Table S37.** Cartesian coordinates (x,y,z) for the optimized geometry of [As(NMe<sub>2</sub>)<sub>2</sub>]<sup>-</sup>.

|    |          |         |          |   |         |          |          |
|----|----------|---------|----------|---|---------|----------|----------|
| As | 0,28331  | 0,95981 | 1,876    | H | -1,1191 | -1,31988 | 0,73539  |
| N  | -1,16525 | 0,7466  | 0,64899  | C | 2,13626 | 2,02109  | -0,08852 |
| N  | 1,83623  | 0,9107  | 0,76443  | H | 1,80516 | 2,94496  | 0,3891   |
| C  | -1,52049 | 1,82294 | -0,22619 | H | 1,64339 | 1,96239  | -1,08168 |
| H  | -1,33212 | 2,77435 | 0,27442  | H | 3,22344 | 2,09663  | -0,28863 |
| H  | -2,59069 | 1,77865 | -0,50971 | C | 2,2559  | -0,32866 | 0,18271  |

|   |          |          |          |   |         |          |          |
|---|----------|----------|----------|---|---------|----------|----------|
| H | -0,94926 | 1,82691  | -1,17826 | H | 3,34744 | -0,33825 | -0,0074  |
| C | -1,39874 | -0,52763 | 0,03866  | H | 1,77127 | -0,54702 | -0,79211 |
| H | -0,81979 | -0,68374 | -0,89574 | H | 2,01346 | -1,14821 | 0,86157  |
| H | -2,46469 | -0,65735 | -0,23454 |   |         |          |          |

**Table S38.** Cartesian coordinates (x,y,z) for the optimized geometry of [Sb(NMe<sub>2</sub>)<sub>2</sub>]<sup>-</sup>.

|    |          |          |          |   |          |          |          |
|----|----------|----------|----------|---|----------|----------|----------|
| Sb | 0,32995  | 1,10742  | 2,02844  | H | -1,24664 | -1,26214 | 0,90145  |
| N  | -1,25995 | 0,80504  | 0,69379  | C | 2,23841  | 1,98903  | -0,21262 |
| N  | 1,96847  | 0,9434   | 0,72879  | H | 1,95829  | 2,95549  | 0,21083  |
| C  | -1,59276 | 1,8207   | -0,26014 | H | 1,68876  | 1,8735   | -1,17004 |
| H  | -1,40127 | 2,80874  | 0,16288  | H | 3,31361  | 2,02505  | -0,47828 |
| H  | -2,66119 | 1,76816  | -0,5494  | C | 2,32876  | -0,33614 | 0,19468  |
| H  | -1,01447 | 1,74546  | -1,20463 | H | 3,40693  | -0,37895 | -0,05769 |
| C  | -1,50596 | -0,50218 | 0,16184  | H | 1,78431  | -0,59442 | -0,73757 |
| H  | -0,9245  | -0,72132 | -0,75801 | H | 2,11706  | -1,11961 | 0,92487  |
| H  | -2,57209 | -0,63293 | -0,11069 |   |          |          |          |

**Table S39.** Cartesian coordinates (x,y,z) for the optimized geometry of [As(OMe)<sub>2</sub>]<sup>-</sup>.

|    |          |          |          |   |          |         |          |
|----|----------|----------|----------|---|----------|---------|----------|
| As | 0,41465  | -0,28936 | -1,56487 | H | -2,40316 | 0,83289 | 0,56913  |
| O  | -1,06156 | -0,348   | -0,42678 | C | 2,26463  | 0,29011 | 0,45625  |
| O  | 1,76487  | -0,72111 | -0,35325 | H | 2,20914  | 1,27496 | -0,03619 |
| C  | -1,31984 | 0,76279  | 0,36513  | H | 3,31932  | 0,08039 | 0,70883  |
| H  | -0,99095 | 1,69719  | -0,11889 | H | 1,71322  | 0,37414 | 1,40964  |
| H  | -0,80842 | 0,70824  | 1,34264  | H | -2,40316 | 0,83289 | 0,56913  |

**Table S40.** Cartesian coordinates (x,y,z) for the optimized geometry of [Sb(OMe)<sub>2</sub>]<sup>-</sup>.

|    |          |          |          |   |         |         |         |
|----|----------|----------|----------|---|---------|---------|---------|
| Sb | 0,43119  | -0,10931 | -1,7954  | H | -2,4574 | 0,81911 | 0,64067 |
| O  | -1,16117 | -0,24445 | -0,5318  | C | 2,32281 | 0,24583 | 0,47285 |
| O  | 1,87226  | -0,66708 | -0,46776 | H | 2,30026 | 1,28514 | 0,10265 |
| C  | -1,38207 | 0,76174  | 0,39562  | H | 3,36294 | 0,00973 | 0,75937 |
| H  | -1,06327 | 1,75365  | 0,03199  | H | 1,7216  | 0,22478 | 1,39919 |
| H  | -0,84525 | 0,5831   | 1,34426  |   |         |         |         |

**Table S41.** Cartesian coordinates (x,y,z) for the optimized geometry of [As(SiMe<sub>3</sub>)<sub>2</sub>]<sup>-</sup>.

|    |         |          |          |   |         |          |         |
|----|---------|----------|----------|---|---------|----------|---------|
| As | 4,73125 | 9,42346  | 4,18903  | H | 2,73441 | 10,16726 | 1,07793 |
| Si | 5,0184  | 9,56749  | 1,91939  | C | 1,6111  | 8,11985  | 2,96121 |
| Si | 3,0506  | 7,86456  | 4,17727  | H | 0,8194  | 7,37933  | 3,1277  |
| C  | 5,11727 | 7,94479  | 0,93301  | H | 1,94721 | 8,0255   | 1,92496 |
| H  | 4,16535 | 7,40736  | 0,9589   | H | 1,18566 | 9,11945  | 3,08138 |
| H  | 5,87975 | 7,28794  | 1,35943  | C | 2,24354 | 7,85049  | 5,89676 |
| H  | 5,36753 | 8,13722  | -0,11733 | H | 1,4759  | 7,07209  | 5,97589 |
| C  | 6,66921 | 10,44577 | 1,58512  | H | 1,78115 | 8,81852  | 6,10727 |
| H  | 7,50051 | 9,85489  | 1,97883  | H | 2,99811 | 7,66916  | 6,66758 |
| H  | 6,68839 | 11,41865 | 2,08469  | C | 3,59131 | 6,06325  | 3,89262 |
| H  | 6,83137 | 10,60559 | 0,51291  | H | 4,34882 | 5,78494  | 4,63047 |

|   |         |          |          |   |         |         |         |
|---|---------|----------|----------|---|---------|---------|---------|
| C | 3,73    | 10,60799 | 0,98382  | H | 4,04096 | 5,94563 | 2,9035  |
| H | 3,97163 | 10,69496 | -0,08299 | H | 2,74844 | 5,36562 | 3,97581 |
| H | 3,68431 | 11,61217 | 1,41421  |   |         |         |         |

**Table S42.** Cartesian coordinates (x,y,z) for the optimized geometry of [Sb(SiMe<sub>3</sub>)<sub>2</sub>].

|    |         |          |          |   |         |          |         |
|----|---------|----------|----------|---|---------|----------|---------|
| Sb | 4,82801 | 9,53542  | 4,36021  | H | 2,77755 | 10,20416 | 1,09043 |
| Si | 5,09218 | 9,63351  | 1,85686  | C | 1,60193 | 8,12209  | 3,00393 |
| Si | 2,9889  | 7,81614  | 4,26494  | H | 0,80548 | 7,37483  | 3,10612 |
| C  | 5,16051 | 7,97025  | 0,94234  | H | 1,98285 | 8,071    | 1,98049 |
| H  | 4,2102  | 7,43628  | 1,02558  | H | 1,17078 | 9,11586  | 3,14728 |
| H  | 5,93699 | 7,33262  | 1,37191  | C | 2,1262  | 7,74978  | 5,95488 |
| H  | 5,37445 | 8,11589  | -0,12358 | H | 1,3549  | 6,97111  | 5,97954 |
| C  | 6,73175 | 10,49907 | 1,44786  | H | 1,65778 | 8,71091  | 6,18173 |
| H  | 7,57473 | 9,9235   | 1,83871  | H | 2,8516  | 7,53914  | 6,74571 |
| H  | 6,76508 | 11,4907  | 1,9078   | C | 3,55613 | 6,03295  | 3,93694 |
| H  | 6,86169 | 10,61744 | 0,36576  | H | 4,28311 | 5,72952  | 4,69486 |
| C  | 3,76846 | 10,63805 | 0,9361   | H | 4,04846 | 5,95686  | 2,96438 |
| H  | 3,96678 | 10,67775 | -0,14247 | H | 2,71404 | 5,3296   | 3,95651 |
| H  | 3,74103 | 11,65952 | 1,32453  |   |         |          |         |

**Table S43.** Cartesian coordinates (x,y,z) for the optimized geometry of [As(GaMe<sub>2</sub>)<sub>2</sub>].

|    |          |          |          |   |          |          |          |
|----|----------|----------|----------|---|----------|----------|----------|
| As | -0,68676 | 2,64078  | -1,36344 | H | -4,3385  | 2,93928  | -0,71538 |
| Ga | 1,22977  | 1,50847  | -0,67553 | H | -4,5299  | 2,27105  | 0,91892  |
| C  | 1,51286  | 0,08137  | 0,71579  | H | -4,80432 | 1,24203  | -0,48482 |
| C  | 3,00823  | 1,95798  | -1,51904 | H | 0,84075  | 0,19496  | 1,56786  |
| Ga | -2,24054 | 1,4882   | -0,06492 | H | 2,54808  | 0,09556  | 1,07187  |
| C  | -4,1785  | 2,05384  | -0,09634 | H | 1,32438  | -0,90629 | 0,28089  |
| C  | -2,04686 | -0,09902 | 1,15807  | H | 2,91079  | 2,70195  | -2,31265 |
| H  | -1,28175 | -0,79647 | 0,8134   | H | 3,46974  | 1,0577   | -1,94085 |
| H  | -3,00036 | -0,62943 | 1,24854  | H | 3,69918  | 2,34733  | -0,76233 |
| H  | -1,7562  | 0,2354   | 2,15998  |   |          |          |          |

**Table S44.** Cartesian coordinates (x,y,z) for the optimized geometry of [Sb(GaMe<sub>2</sub>)<sub>2</sub>].

|    |          |          |          |   |          |          |          |
|----|----------|----------|----------|---|----------|----------|----------|
| Sb | -0,70439 | 2,79821  | -1,46401 | H | -4,50205 | 2,92039  | -0,63988 |
| Ga | 1,34425  | 1,52675  | -0,70436 | H | -4,63722 | 2,23001  | 0,99069  |
| C  | 1,53997  | 0,07613  | 0,67417  | H | -4,91911 | 1,20925  | -0,41857 |
| C  | 3,15048  | 1,94031  | -1,50077 | H | 0,82654  | 0,18653  | 1,4919   |
| Ga | -2,358   | 1,50986  | -0,05073 | H | 2,55596  | 0,06882  | 1,08193  |
| C  | -4,30581 | 2,03277  | -0,03518 | H | 1,35979  | -0,90014 | 0,21098  |
| C  | -2,08609 | -0,08658 | 1,14135  | H | 3,09367  | 2,6933   | -2,28935 |
| H  | -1,30775 | -0,75155 | 0,76433  | H | 3,59805  | 1,03131  | -1,91851 |
| H  | -3,01889 | -0,64955 | 1,24829  | H | 3,83     | 2,30474  | -0,72183 |
| H  | -1,77928 | 0,24413  | 2,13955  |   |          |          |          |



- [1] N. J. Hardman, B. E. Eichler, P. P. Power, *Chem. Commun.* **2000**, 1991-1992.
- [2] N. Kuhn, T. Kratz, *Synthesis* **1993**, 561-562.
- [3] P. Jutzi, C. Müller, A. Stammler, H.-G. Stammler, *Organomet.* **2000**, *19*, 1442-1444.
- [4] I. Krossing, A. Reisinger, *Eur. J. Inorg. Chem.* **2005**, 1979-1989.
- [5] a) C. Ganesamoorthy, C. Helling, C. Wölper, W. Frank, E. Bill, G. E. Cutsail III, S. Schulz, *Nat. Commun.* **2018**, *9*, 87–95; b) J. Krüger, C. Ganesamoorthy, L. John, C. Wölper, S. Schulz, *Chem. Eur. J.* **2018**, *24*, 9157–9164; c) J. Schoening, L. John, C. Wölper, S. Schulz, *Dalton Transaction*, **2019**, *48*, 17729–17734.
- [6] G. M. Sheldrick, *Acta Crystallogr.* 1990, **A46**, 467.
- [7] G. M. Sheldrick, SHELXL-2017, Program for the Refinement of Crystal Structures University of Göttingen, Göttingen (Germany) **2017**. (see also: Sheldrick, G. M. *Acta Crystallogr.* 2008, **A64**, 112).
- [8] shelXle, A Qt GUI for SHELXL, C. B. Hübschle, G. M. Sheldrick, B. Dittrich, *J. Appl. Cryst.* **2011**, *44*, 1281-1284.
- [9] PLATON/SQUEEZE, P. van der Sluis, A. L. Spek, *Acta Crystallogr.* **1990**, *A46*, 194-201.
- [10] F. Neese, The ORCA program system. *Wiley Interdisciplinary Reviews: Computational Molecular Science* **2012**, *2*, 73.
- [11] a) F. Weigend, R. Ahlrichs, *Phys. Chem. Chem. Phys.* **2005**, *7*, 3297-3305.
- [12] a) S. Grimme, S. Ehrlich, L. Goerigk, *J. Comput. Chem.* **2011**, *32*, 1456–1465; b) S. Grimme, J. Antony, S. Ehrlich; H. Krieg, *J. Chem. Phys.* **2010**, *132*, 154104.
- [13] F. Weigend, R. Ahlrichs, *Phys. Chem. Chem. Phys.* **2005**, *7*, 3297-3305.
- [14] B. Metz, H. Stoll, M. Dolg, *J. Chem. Phys.* **2000**, *113*, 2563-2569.
- [15] S. Kossmann, F. Neese, *Chem. Phys. Lett.* **2009**, *481*, 240-243.
- [16] NBO 6.0: E. D. Glendening, J. K. Badenhoop, A. E. Reed, J. E. Carpenter, J. A. Bohmann, C. M. Morales, C. R. Landis, F. Weinhold (Theoretical Chemistry Institute, University of Wisconsin, Madison, WI, 2013); <http://nbo6.chem.wisc.edu/>
